# Supplementary material for: Changes and Trend Disparities in Life Expectancy and Health-Adjusted Life Expectancy Attributed to Disability and Mortality From 1990 to 2019 in China
Source: PubMed Central journal article supplement (PMC9339800; doi:10.3389/fpubh.2022.925114), 2022-07-18
Supplement: Data_Sheet_1.pdf [file Data_Sheet_1.pdf]

**Table S1 | List of International Classification of Diseases (ICD) codes for causes from Global Burden of Disease 2019 (Level 1-3).**

| Level | Cause | ICD10                                         | ICD9                                                                                                                                                                                                                                                                                  |                                                                                                                                                                                                         |
|-------|-------|-----------------------------------------------|---------------------------------------------------------------------------------------------------------------------------------------------------------------------------------------------------------------------------------------------------------------------------------------|---------------------------------------------------------------------------------------------------------------------------------------------------------------------------------------------------------|
| 2     | A.1   | HIV/AIDS and sexually transmitted infections  | A50-A60.9, A63-A64.0, B20-B23.8, B24-B24.0, B63, B97.81, C46-C46.52, C46.7-C46.9, F02.4, I98.0, K67.0-K67.2, M73.0-M73.8, N70-N71.9, N73-N74, N74.2-N74.8, O98.7-O98.73, Z11.3-Z11.4, Z20.2, Z20.6, Z21, Z22.4, Z83.0                                                                 | 042-044.9, 054.1, 054.11-054.19, 090-099.9, 131-131.9, 176-176.9, 613-615.9, V01.6, V02.7-V02.9, V08, V73.8, V73.88, V73.9-V73.98, V74.5-V74.6                                                          |
| 3     | A.1.1 | HIV/AIDS                                      | B20-B23.8, B24-B24.0, B97.81, C46-C46.52, C46.7-C46.9, F02.4, O98.7-O98.73, Z11.4, Z20.6, Z21, Z83.0                                                                                                                                                                                  | 042-044.9, 176-176.9, V08                                                                                                                                                                               |
| 3     | A.1.2 | Sexually transmitted infections excluding HIV | A50-A60.9, A63-A64.0, B63, I98.0, K67.0-K67.2, M73.0-M73.8, N70-N71.9, N73-N74, N74.2-N74.8, Z11.3, Z20.2, Z22.4                                                                                                                                                                      | 054.1, 054.11-054.19, 090-099.9, 131-131.9, 613-615.9, V01.6, V02.7-V02.9, V73.8, V73.88, V73.9-V73.98, V74.5-V74.6                                                                                     |
| 2     | A.2   | Respiratory infections and tuberculosis       | A10-A14, A15-A18.89, A19-A19.9, A48.1, A70, B90-B90.9, B96.0-B96.1, B97.21, B97.4-B97.6, H65-H70.93, J00-J06.9, J09-J18.2, J18.8-J18.9, J19.6-J22.9, J36-J36.0, J85.1, J91.0, K67.3, K93.0, M49.0, N74.0-N74.1, P23-P23.9, P37.0, U04-U04.9, U84.3, Z03.0, Z11.1, Z20.1, Z23.2, Z25.1 | 010-019.9, 079.82, 137-137.9, 320.4, 381-383.9, 460-469, 470.0, 475-475.9, 480-484, 484.1-490.9, 510-511.9, 513.0-513.9, 730.4-730.6, 770.0, V01.1, V01.82, V03.2, V04.7, V04.81, V12.01, V12.61, V74.1 |
| 3     | A.2.1 | Tuberculosis                                  | A10-A14, A15-A18.89, A19-A19.9, B90-B90.9, K67.3, K93.0, M49.0, N74.0-N74.1, P37.0, U84.3, Z03.0, Z11.1, Z20.1, Z23.2                                                                                                                                                                 | 010-019.9, 137-137.9, 320.4, 730.4-730.6, V01.1, V03.2, V12.01, V74.1                                                                                                                                   |
| 3     | A.2.2 | Lower respiratory infections                  | A48.1, A70, B96.0-B96.1, B97.21, B97.4-B97.6, J09-J18.2, J18.8-J18.9, J19.6-J22.9, J85.1, J91.0, P23-P23.9, U04-U04.9, Z25.1                                                                                                                                                          | 079.82, 466-469, 470.0, 480-484, 484.1-490.9, 510-511.9, 513.0-513.9, 770.0, V01.82, V04.7, V04.81, V12.61                                                                                              |
| 3     | A.2.3 | Upper respiratory infections                  | J00-J06.9, J36-J36.0                                                                                                                                                                                                                                                                  | 460-465.9, 475-475.9                                                                                                                                                                                    |
| 3     | A.2.4 | Otitis media                                  | H65-H70.93                                                                                                                                                                                                                                                                            | 381-383.9                                                                                                                                                                                               |
| 2     | A.3   | Enteric infections                            | A00-A08.8, A09, A80-A80.9, B91, K52.1, Z11.0, Z20.0-Z20.09, Z22.1, Z23.0                                                                                                                                                                                                              | 001-009.9, 045-045.93, 138, V01.0, V01.83, V02.0, V02.2-V02.3, V03.0, V74.0                                                                                                                             |
| 3     | A.3.1 | Diarrheal diseases                            | A00-A00.9, A02-A02.0, A02.8-A07, A07.2-A07.4, A08-A08.8, A09, K52.1, Z22.1, Z23.0                                                                                                                                                                                                     | 001-001.9, 003.8-009.9, V01.0, V01.83, V02.0, V02.2-V02.3, V03.0, V74.0                                                                                                                                 |
| 3     | A.3.2 | Typhoid and paratyphoid                       | A01-A01.4, Z11.0, Z20.0-Z20.09                                                                                                                                                                                                                                                        | 002-002.9                                                                                                                                                                                               |
| 3     | A.3.3 | Invasive Non-typhoidal Salmonella (iNTS)      | A02.1-A02.29                                                                                                                                                                                                                                                                          | 003-003.7                                                                                                                                                                                               |
| 3     | A.3.4 | Other intestinal infectious diseases          | A07.0-A07.1, A07.8-A07.9, A80-A80.9, B91                                                                                                                                                                                                                                              | 045-045.93, 138                                                                                                                                                                                         |
| 2     | A.4   | Neglected tropical diseases and malaria       | A30-A30.9, A68-A68.9, A69.2-A69.29, A69.8-A69.9, A71-A71.9, A74.0, A75-A75.9, A77-A79.9, A82-A82.9, A90-A91.0, A92-A96.9, A98-A99.0, B33.0-B33.1, B50-B50.0,                                                                                                                          | 030-030.9, 060-061.8, 065-066.9, 071-071.9, 076-076.9, 080-088.9, 120-129.0, 425.6, V01.5,                                                                                                              |

| Level | Cause  | ICD10                                                                                                                                                                                                                                                                                                                                                         | ICD9                                                                                                                                                                                                                                                                         |
|-------|--------|---------------------------------------------------------------------------------------------------------------------------------------------------------------------------------------------------------------------------------------------------------------------------------------------------------------------------------------------------------------|------------------------------------------------------------------------------------------------------------------------------------------------------------------------------------------------------------------------------------------------------------------------------|
|       |        | B50.8-B52.0, B52.8-B53.1, B53.8-B57.5, B60-B60.8, B64-B83.9, B89, B92, B94.0, K93.1, P37.1, P37.3-P37.4, U06-U06.9, Z11.6, Z20.3, Z24.2-Z24.3, Z26.0                                                                                                                                                                                                          | V04.4-V04.5, V05.2, V12.03, V73.4-V73.6, V74.2, V75.1-V75.3, V75.5-V75.8                                                                                                                                                                                                     |
| 3     | A.4.1  | Malaria<br>B50-B50.0, B50.8-B52.0, B52.8-B53.1, B53.8-B54.0, P37.3-P37.4                                                                                                                                                                                                                                                                                      | 084-084.9, V12.03, V75.1                                                                                                                                                                                                                                                     |
| 3     | A.4.2  | Chagas disease<br>B57-B57.5, K93.1                                                                                                                                                                                                                                                                                                                            | 086-086.2, 425.6                                                                                                                                                                                                                                                             |
| 3     | A.4.3  | Leishmaniasis<br>B55-B55.9, Z26.0                                                                                                                                                                                                                                                                                                                             | 085-085.9, V05.2, V75.2                                                                                                                                                                                                                                                      |
| 3     | A.4.4  | African trypanosomiasis<br>B56-B56.9                                                                                                                                                                                                                                                                                                                          | 086.3-086.9, V75.3                                                                                                                                                                                                                                                           |
| 3     | A.4.5  | Schistosomiasis<br>B65-B65.9                                                                                                                                                                                                                                                                                                                                  | 120-120.9, V75.5                                                                                                                                                                                                                                                             |
| 3     | A.4.6  | Cysticercosis<br>B69-B69.9                                                                                                                                                                                                                                                                                                                                    | 123.1                                                                                                                                                                                                                                                                        |
| 3     | A.4.7  | Cystic echinococcosis<br>B67-B67.4, B67.8-B67.99                                                                                                                                                                                                                                                                                                              | 122-122.4, 122.8-122.9                                                                                                                                                                                                                                                       |
| 3     | A.4.8  | Lymphatic filariasis<br>B74-B74.2                                                                                                                                                                                                                                                                                                                             | 125.0-125.2                                                                                                                                                                                                                                                                  |
| 3     | A.4.9  | Onchocerciasis<br>B73-B73.1                                                                                                                                                                                                                                                                                                                                   | 125.3                                                                                                                                                                                                                                                                        |
| 3     | A.4.10 | Trachoma<br>A71-A71.9, A74.0, B94.0                                                                                                                                                                                                                                                                                                                           | 076-076.9, V73.6                                                                                                                                                                                                                                                             |
| 3     | A.4.11 | Dengue<br>A90-A91.0                                                                                                                                                                                                                                                                                                                                           | 061-061.8                                                                                                                                                                                                                                                                    |
| 3     | A.4.12 | Yellow fever<br>A95-A95.9, Z24.3                                                                                                                                                                                                                                                                                                                              | 060-060.9, V04.4, V73.4                                                                                                                                                                                                                                                      |
| 3     | A.4.13 | Rabies<br>A82-A82.9, Z20.3, Z24.2                                                                                                                                                                                                                                                                                                                             | 071-071.9, V01.5, V04.5                                                                                                                                                                                                                                                      |
| 3     | A.4.14 | Intestinal nematode infections<br>B76-B77.9, B79, Z11.6                                                                                                                                                                                                                                                                                                       | 126-126.9, 127.0, 127.3, V75.7                                                                                                                                                                                                                                               |
| 3     | A.4.15 | Food-borne trematodiasis<br>B66-B66.9, B72.0                                                                                                                                                                                                                                                                                                                  | 121-121.9, V75.6                                                                                                                                                                                                                                                             |
| 3     | A.4.16 | Leprosy<br>A30-A30.9, B92                                                                                                                                                                                                                                                                                                                                     | 030-030.9, V74.2                                                                                                                                                                                                                                                             |
| 3     | A.4.17 | Ebola<br>A98.4                                                                                                                                                                                                                                                                                                                                                |                                                                                                                                                                                                                                                                              |
| 3     | A.4.18 | Zika virus<br>U06-U06.9                                                                                                                                                                                                                                                                                                                                       | 066.3                                                                                                                                                                                                                                                                        |
| 3     | A.4.19 | Guinea worm disease<br>B72                                                                                                                                                                                                                                                                                                                                    |                                                                                                                                                                                                                                                                              |
| 3     | A.4.20 | Other neglected tropical diseases<br>A68-A68.9, A69.2-A69.29, A69.8-A69.9, A75-A75.9, A77-A79.9, A92-A94.0, A96-A96.9, A98-A98.3, A98.5-A99.0, B33.0-B33.1, B60-B60.8, B64, B67.5-B67.7, B68-B68.9, B70-B71.9, B74.3-B75, B78-B78.9, B80-B83.9, B89, P37.1                                                                                                    | 065-066.2, 066.4-066.9, 080-083.9, 087-088.9, 122.5-122.7, 123-123.0, 123.2-125, 125.4-125.9, 127, 127.1-127.2, 127.4-129.0, V73.5, V75.8                                                                                                                                    |
| 2     | A.5    | Other infectious diseases<br>A20-A28.9, A31-A39.9, A42-A44.9, A48-A48.0, A48.2-A49.9, A65-A65.0, A69-A69.1, A74, A74.8-A74.9, A81-A81.9, A83-A85.2, A85.8-A86.0, A87-A89.0, B00-B06.9, B10-B10.89, B15-B19.9, B25-B27.99, B33, B33.3-B34.9, B37-B37.2, B37.5-B47.1, B47.9-B49, B58-B59, B94, B94.1-B95.0, B95.2-B96, B96.2-B97.2, B97.29-B97.39, B97.7-B97.8, | 020-029, 031-034.9, 036-039.4, 039.8-040, 040.1-040.9, 046-054.0, 054.10, 054.2-059.9, 062-064.9, 070-070.9, 072-074.1, 074.20, 074.3-075.9, 078, 078.2-079.81, 079.83-079.99, 100-101.6, 104-104.9, 112-112.0, 112.3-118.9, 130-130.9, 136-136.0, 136.2-136.9, 138.0-139.9, |

| Level | Cause | ICD10                                                                                                                                                                                                                                                                                                                                                                                                                              | ICD9                                                                                                                                                                                                                                                                                                                                                                                                                                                                                                                                                                                                                                                                                                                                                                             |                                                                                                                                                                                                                                                                                                                                                                                                                                                                                                                                                                                                                                                                                                |
|-------|-------|------------------------------------------------------------------------------------------------------------------------------------------------------------------------------------------------------------------------------------------------------------------------------------------------------------------------------------------------------------------------------------------------------------------------------------|----------------------------------------------------------------------------------------------------------------------------------------------------------------------------------------------------------------------------------------------------------------------------------------------------------------------------------------------------------------------------------------------------------------------------------------------------------------------------------------------------------------------------------------------------------------------------------------------------------------------------------------------------------------------------------------------------------------------------------------------------------------------------------|------------------------------------------------------------------------------------------------------------------------------------------------------------------------------------------------------------------------------------------------------------------------------------------------------------------------------------------------------------------------------------------------------------------------------------------------------------------------------------------------------------------------------------------------------------------------------------------------------------------------------------------------------------------------------------------------|
|       |       | B97.89, B99-B99.9, D70.3, D86.81, D89.3, F02.1, F07.1, G00-G09.9, G14-G14.6, I00, I02, I02.9, I96-I96.9, I98.1, J85-J85.0, J85.2-J85.3, J86-J86.9, K75.0, K75.3, K76.3, M49.1, M89.6-M89.69, P35-P35.9, P37, P37.2, P37.5-P37.9, R02-R02.9, U82-U84, U85-U89, Z11, Z11.2, Z11.5-Z11.59, Z11.8-Z11.9, Z16-Z16.39, Z20, Z20.4-Z20.5, Z20.8-Z20.9, Z22-Z22.0, Z22.2-Z22.39, Z22.5-Z22.9, Z23.3-Z23.7, Z24.0-Z24.1, Z24.4-Z25.0, Z83.1 | 310.89, 320-320.3, 320.5-326.9, 390-390.9, 392, 392.9, 484.0, 572.0-572.1, 771.0-771.3, V01, V01.2-V01.4, V01.7-V01.81, V01.84-V02, V02.1, V02.4-V02.5, V02.52-V02.69, V03.1, V03.3-V04.3, V04.6, V04.8, V04.89-V05.1, V05.3-V06, V07-V07.0, V07.2-V07.3, V09-V09.91, V12.00, V12.02, V12.04-V12.09, V18.8, V58.62, V73.0-V73.3, V73.81, V73.89, V73.99, V74.3, V74.8-V74.9, V75.0, V75.4, V75.9                                                                                                                                                                                                                                                                                                                                                                                 |                                                                                                                                                                                                                                                                                                                                                                                                                                                                                                                                                                                                                                                                                                |
| 3     | A.5.1 | Meningitis                                                                                                                                                                                                                                                                                                                                                                                                                         | A39-A39.9, A87-A87.9, D86.81, G00-G03.9, G06-G09.9, Z20.811, Z22.31                                                                                                                                                                                                                                                                                                                                                                                                                                                                                                                                                                                                                                                                                                              | 036-036.9, 047-049.9, 054.72, 320-320.3, 320.5-322.9, 324-326.9, V01.84                                                                                                                                                                                                                                                                                                                                                                                                                                                                                                                                                                                                                        |
| 3     | A.5.2 | Encephalitis                                                                                                                                                                                                                                                                                                                                                                                                                       | A83-A85.2, A85.8-A86.0, B94.1, F07.1, G04-G05.8, Z24.1                                                                                                                                                                                                                                                                                                                                                                                                                                                                                                                                                                                                                                                                                                                           | 062-064.9, 310.89, 323-323.9, V05.0-V05.1                                                                                                                                                                                                                                                                                                                                                                                                                                                                                                                                                                                                                                                      |
| 3     | A.5.3 | Diphtheria                                                                                                                                                                                                                                                                                                                                                                                                                         | A36-A36.9, Z22.2, Z23.6                                                                                                                                                                                                                                                                                                                                                                                                                                                                                                                                                                                                                                                                                                                                                          | 032-032.9, V02.4, V03.5, V74.3                                                                                                                                                                                                                                                                                                                                                                                                                                                                                                                                                                                                                                                                 |
| 3     | A.5.4 | Whooping cough                                                                                                                                                                                                                                                                                                                                                                                                                     | A37-A37.91, Z23.7                                                                                                                                                                                                                                                                                                                                                                                                                                                                                                                                                                                                                                                                                                                                                                | 033-033.9, V03.6                                                                                                                                                                                                                                                                                                                                                                                                                                                                                                                                                                                                                                                                               |
| 3     | A.5.5 | Tetanus                                                                                                                                                                                                                                                                                                                                                                                                                            | A33-A35.0, Z23.5                                                                                                                                                                                                                                                                                                                                                                                                                                                                                                                                                                                                                                                                                                                                                                 | 037-037.9, 771.3, V03.7                                                                                                                                                                                                                                                                                                                                                                                                                                                                                                                                                                                                                                                                        |
| 3     | A.5.6 | Measles                                                                                                                                                                                                                                                                                                                                                                                                                            | B05-B05.9, Z24.4                                                                                                                                                                                                                                                                                                                                                                                                                                                                                                                                                                                                                                                                                                                                                                 | 055-055.9, 484.0, V04.2, V73.2                                                                                                                                                                                                                                                                                                                                                                                                                                                                                                                                                                                                                                                                 |
| 3     | A.5.7 | Varicella and herpes zoster                                                                                                                                                                                                                                                                                                                                                                                                        | B01-B02.9, Z20.820                                                                                                                                                                                                                                                                                                                                                                                                                                                                                                                                                                                                                                                                                                                                                               | 052-053.9, V01.71-V01.79, V05.4                                                                                                                                                                                                                                                                                                                                                                                                                                                                                                                                                                                                                                                                |
| 3     | A.5.8 | Acute hepatitis                                                                                                                                                                                                                                                                                                                                                                                                                    | B15-B19.9, B94.2, P35.3, Z20.5, Z22.5-Z22.59, Z24.6                                                                                                                                                                                                                                                                                                                                                                                                                                                                                                                                                                                                                                                                                                                              | 070-070.9, V02.6-V02.69, V05.3                                                                                                                                                                                                                                                                                                                                                                                                                                                                                                                                                                                                                                                                 |
| 3     | A.5.9 | Other unspecified infectious diseases                                                                                                                                                                                                                                                                                                                                                                                              | A20-A28.9, A31-A32.9, A38-A38.9, A42-A44.9, A48-A48.0, A48.2-A49.9, A65-A65.0, A69-A69.1, A74, A74.8-A74.9, A81-A81.9, A88-A89.0, B00-B00.9, B03-B04, B06-B06.9, B10-B10.89, B25-B27.99, B33, B33.3-B34.9, B37-B37.2, B37.5-B47.1, B47.9-B49, B58-B59, B94, B94.8-B95.0, B95.2-B96, B96.2-B97.2, B97.29-B97.39, B97.7-B97.8, B97.89, B99-B99.9, D70.3, D89.3, F02.1, G14-G14.6, I00, I02, I02.9, I96-I96.9, I98.1, J85-J85.0, J85.2-J85.3, J86-J86.9, K75.0, K75.3, K76.3, M49.1, M89.6-M89.69, P35-P35.2, P35.8-P35.9, P37, P37.2, P37.5-P37.9, R02-R02.9, U82-U84, U85-U89, Z11, Z11.2, Z11.5-Z11.59, Z11.8-Z11.9, Z16-Z16.39, Z20, Z20.4, Z20.8-Z20.810, Z20.818-Z20.82, Z20.828-Z20.9, Z22-Z22.0, Z22.3, Z22.32-Z22.39, Z22.6-Z22.9, Z23.3-Z23.4, Z24.0, Z24.5, Z25.0, Z83.1 | 020-029, 031-031.9, 034-034.9, 039-039.4, 039.8-040, 040.1-040.9, 046-046.9, 050-051.9, 054-054.0, 054.10, 054.2-054.71, 054.73-054.9, 056-059.9, 072-074.1, 074.20, 074.3-075.9, 078, 078.2-079.81, 079.83-079.99, 100-101.6, 104-104.9, 112-112.0, 112.3-118.9, 130-130.9, 136-136.0, 136.2-136.9, 138.0-139.9, 390-390.9, 392, 392.9, 572.0-572.1, 771.0-771.2, V01, V01.2-V01.4, V01.7, V01.8-V01.81, V01.89-V02, V02.1, V02.5, V02.52-V02.59, V03.1, V03.3-V03.4, V03.8-V04.1, V04.3, V04.6, V04.8, V04.89-V05, V05.8-V06, V07-V07.0, V07.2-V07.3, V09-V09.91, V12.00, V12.02, V12.04-V12.09, V18.8, V58.62, V73.0-V73.1, V73.3, V73.81, V73.89, V73.99, V74.8-V74.9, V75.0, V75.4, V75.9 |

| Level | Cause | ICD10                           | ICD9                                                                                                                                                                                                                                                                                                                                                                                                                                                                                                                                                                                                                        |                                                                                                                                                                                                                  |
|-------|-------|---------------------------------|-----------------------------------------------------------------------------------------------------------------------------------------------------------------------------------------------------------------------------------------------------------------------------------------------------------------------------------------------------------------------------------------------------------------------------------------------------------------------------------------------------------------------------------------------------------------------------------------------------------------------------|------------------------------------------------------------------------------------------------------------------------------------------------------------------------------------------------------------------|
| 2     | A.6   | Maternal and neonatal disorders | A40.1, B95.1, F53-F54, N82-N82.9, N96, O00-O16.9, O18.0, O20-O26.93, O28-O36.93, O38.4, O40-O48.1, O60-O77.9, O80-O92.79, O94-O95, O96-O98.63, O98.8-P05.9, P07-P15.9, P19-P22.9, P24-P29.9, P36-P36.9, P38-P39.9, P50-P61.9, P70-P72.9, P74-P74.9, P75.0-P78.9, P80-P81.9, P83-P84, P90-P92.9, P94-P94.9, P96, P96.3-P96.4, P96.8-P96.9, P99.9, Z03.7-Z03.79, Z32-Z37.9, Z39-Z3A49, Z64.0-Z64.3, Z87.5-Z87.6                                                                                                                                                                                                               | 041.02, 619-619.9, 630-679.14, 760-768, 768.2-770, 770.2-771, 771.4-775.1, 775.4-779.34, 779.7-779.9, V02.51, V13.1, V13.21, V13.7, V15.21-V15.22, V15.87, V22-V24.2, V27-V28.9, V72.4-V72.42, V82.4, V91-V91.99 |
| 3     | A.6.1 | Maternal disorders              | F53-F54, N82-N82.9, N96, O00-O16.9, O18.0, O20-O26.93, O28-O36.93, O38.4, O40-O48.1, O60-O77.9, O80-O92.79, O94-O95, O96-O98.63, O98.8-O9A513, Z03.7-Z03.79, Z32-Z37.9, Z39-Z3A49, Z64.0-Z64.3, Z87.5-Z87.6                                                                                                                                                                                                                                                                                                                                                                                                                 | 619-619.9, 630-655.23, 655.7-679.14, V13.1, V13.21, V15.21-V15.22, V22-V24.2, V27-V28.9, V72.4-V72.42, V82.4, V91-V91.99                                                                                         |
| 3     | A.6.2 | Neonatal disorders              | A40.1, B95.1, P00-P05.9, P07-P15.9, P19-P22.9, P24-P29.9, P36-P36.9, P38-P39.9, P50-P61.9, P70-P72.9, P74-P74.9, P75.0-P78.9, P80-P81.9, P83-P84, P90-P92.9, P94-P94.9, P96, P96.3-P96.4, P96.8-P96.9, P99.9                                                                                                                                                                                                                                                                                                                                                                                                                | 041.02, 655.3-655.63, 760-768, 768.2-770, 770.2-771, 771.4-775.1, 775.4-779.34, 779.7-779.9, V02.51, V13.7, V15.87                                                                                               |
| 2     | A.7   | Nutritional deficiencies        | D50-D53.9, E00-E02, E40-E46.9, E50-E61.9, E63-E64.9, Z13.2-Z13.3                                                                                                                                                                                                                                                                                                                                                                                                                                                                                                                                                            | 244.2, 260-269.9, 280-281.2, V12.1, V18.2-V18.3, V77.2, V78.0-V78.1                                                                                                                                              |
| 3     | A.7.1 | Protein-energy malnutrition     | E40-E46.9, E64.0                                                                                                                                                                                                                                                                                                                                                                                                                                                                                                                                                                                                            | 260-263.9                                                                                                                                                                                                        |
| 3     | A.7.2 | Iodine deficiency               | E00-E02                                                                                                                                                                                                                                                                                                                                                                                                                                                                                                                                                                                                                     | 244.2                                                                                                                                                                                                            |
| 3     | A.7.3 | Vitamin A deficiency            | E50-E50.9, E64.1                                                                                                                                                                                                                                                                                                                                                                                                                                                                                                                                                                                                            | 264-264.9                                                                                                                                                                                                        |
| 3     | A.7.4 | Dietary iron deficiency         | D50-D50.9                                                                                                                                                                                                                                                                                                                                                                                                                                                                                                                                                                                                                   | 280-280.9                                                                                                                                                                                                        |
| 3     | A.7.5 | Other nutritional deficiencies  | D51-D53.9, E51-E61.9, E63-E64, E64.2-E64.9                                                                                                                                                                                                                                                                                                                                                                                                                                                                                                                                                                                  | 265-269.9, 281-281.2                                                                                                                                                                                             |
| 2     | B.1   | Neoplasms                       | C00-C07, C08-C19.0, C20, C21-C21.8, C22-C22.4, C22.7-C23, C24-C26.1, C26.8-C26.9, C30-C30.1, C31-C33, C34-C34.92, C37-C37.0, C38-C39.9, C40-C41.4, C41.8-C41.9, C43-C45.2, C45.7, C45.9, C47-C4A, C50-C50.629, C50.8-C52, C53-C54.3, C54.8-C56.2, C56.9-C58.0, C60-C64.2, C64.9-C69.92, C70-C70.1, C70.9-C73, C74-C75.5, C75.8-C79.9, C80-C81.49, C81.7-C81.79, C81.9-C85.29, C85.7-C86.6, C88-C90.32, C91-C93.7, C93.9-C95.2, C95.7-C97.9, D00-D24.9, D26.0-D39.9, D4-D49.9, E34.0, K51.4-K51.419, K62.0-K62.3, K63.5, N60-N60.99, N84.0-N84.1, N87-N87.9, Z03.1, Z08-Z09.9, Z12-Z12.9, Z80-Z80.9, Z85-Z85.9, Z86.0-Z86.03 | 140-175.9, 177-217.8, 219-237.6, 237.70-237.72, 237.9-239.9, 569.0, 610-610.9, 622.1-622.2, 622.7, V07.39, V10-V11, V13.22-V13.24, V16-V16.9, V42.4, V42.81-V42.82, V59.2-V59.3, V72.32, V76-V76.9               |

| Level | Cause  | ICD10                                   | ICD9                                                             |                                                              |
|-------|--------|-----------------------------------------|------------------------------------------------------------------|--------------------------------------------------------------|
| 3     | B.1.1  | Lip and oral cavity cancer              | C00-C07, C08-C08.9, Z85.81-Z85.810                               | 140-145.9, V76.42                                            |
| 3     | B.1.2  | Nasopharynx cancer                      | C11-C11.9                                                        | 147-147.9                                                    |
| 3     | B.1.3  | Other pharynx cancer                    | C09-C10.9, C12-C13.9                                             | 146-146.9, 148-148.9                                         |
| 3     | B.1.4  | Esophageal cancer                       | C15-C15.9, Z85.01                                                | 150-150.9                                                    |
| 3     | B.1.5  | Stomach cancer                          | C16-C16.9, Z12.0, Z85.02-Z85.028                                 | 151-151.9, 209.23, V10.04                                    |
| 3     | B.1.6  | Colon and rectum cancer                 | C18-C19.0, C20, C21-C21.8, Z12.1-Z12.13, Z85.03-Z85.048, Z86.010 | 153-154.9, 209.1-209.17, V10.05-V10.06, V76.41, V76.5-V76.52 |
| 3     | B.1.7  | Liver cancer                            | C22-C22.4, C22.7-C22.9, Z85.05                                   | 155-155.9, V10.07                                            |
| 3     | B.1.8  | Gallbladder and biliary tract cancer    | C23, C24-C24.9                                                   | 156-156.9                                                    |
| 3     | B.1.9  | Pancreatic cancer                       | C25-C25.9, Z85.07                                                | 157-157.9                                                    |
| 3     | B.1.10 | Larynx cancer                           | C32-C32.9, Z85.21                                                | 161-161.9, V10.21                                            |
| 3     | B.1.11 | Tracheal, bronchus, and lung cancer     | C33, C34-C34.92, Z12.2, Z80.1-Z80.2, Z85.1-Z85.20                | 162-162.9, 209.21, V10.1-V10.20, V16.1-V16.2, V16.4-V16.40   |
| 3     | B.1.12 | Malignant skin melanoma                 | C43-C43.9, Z85.82-Z85.828                                        | 172-172.9                                                    |
| 3     | B.1.13 | Non-melanoma skin cancer                | C44.01-C44.99                                                    | 173-173.99                                                   |
| 3     | B.1.14 | Breast cancer                           | C50-C50.629, C50.8-C50.929, Z12.3-Z12.39, Z80.3, Z85.3, Z86.000  | 174-175.9, V10.3, V16.3                                      |
| 3     | B.1.15 | Cervical cancer                         | C53-C53.9, Z12.4, Z85.41                                         | 180-180.9, V10.41, V72.32                                    |
| 3     | B.1.16 | Uterine cancer                          | C54-C54.3, C54.8-C54.9, Z85.42, Z86.001                          | 182-182.9                                                    |
| 3     | B.1.17 | Ovarian cancer                          | C56-C56.2, C56.9, Z80.41, Z85.43                                 | 183-183.0, 183.8-183.9, V10.43, V16.41                       |
| 3     | B.1.18 | Prostate cancer                         | C61-C61.9, Z12.5, Z80.42, Z85.46                                 | 185-185.9, V10.46, V16.42, V76.44                            |
| 3     | B.1.19 | Testicular cancer                       | C62-C62.92, Z80.43, Z85.47-Z85.48                                | 186-186.9, V10.47-V10.48, V16.43                             |
| 3     | B.1.20 | Kidney cancer                           | C64-C64.2, C64.9-C65.9, Z80.51, Z85.52-Z85.54                    | 189-189.1, 189.5-189.6, 209.24                               |
| 3     | B.1.21 | Bladder cancer                          | C67-C67.9, Z12.6-Z12.79, Z80.52, Z85.51                          | 188-188.9, V10.51, V16.52, V76.3                             |
| 3     | B.1.22 | Brain and central nervous system cancer | C70-C70.1, C70.9-C72.9, Z85.841-Z85.848, Z86.011                 | 191-191.9                                                    |
| 3     | B.1.23 | Thyroid cancer                          | C73, Z85.850                                                     | 193-193.9                                                    |
| 3     | B.1.24 | Mesothelioma                            | C45-C45.2, C45.7, C45.9                                          |                                                              |
| 3     | B.1.25 | Hodgkin lymphoma                        | C81-C81.49, C81.7-C81.79, C81.9-C81.99, Z85.71-Z85.72            | 201-201.98, V10.72                                           |
| 3     | B.1.26 | Non-Hodgkin lymphoma                    | C82-C85.29, C85.7-C86.6, C96-C96.9                               | 200-200.9, 202-202.98                                        |
| 3     | B.1.27 | Multiple myeloma                        | C88-C90.32                                                       | 203-203.9                                                    |

| Level | Cause  | ICD10                                 | ICD9                                                                                                                                                                                                                                                                                                                                                                                                                                                                                                                                                                                                                                                                                                                                                                             |
|-------|--------|---------------------------------------|----------------------------------------------------------------------------------------------------------------------------------------------------------------------------------------------------------------------------------------------------------------------------------------------------------------------------------------------------------------------------------------------------------------------------------------------------------------------------------------------------------------------------------------------------------------------------------------------------------------------------------------------------------------------------------------------------------------------------------------------------------------------------------|
| 3     | B.1.28 | Leukemia                              | C91-C93.7, C93.9-C95.2, C95.7-C95.92, Z80.6, Z85.6<br>204-208.92, V10.59-V10.69, V16.6                                                                                                                                                                                                                                                                                                                                                                                                                                                                                                                                                                                                                                                                                           |
| 3     | B.1.30 | Other neoplasms                       | C75.90-C75.92, D00-D24.9, D26.0-D39.9, D4-D49.9, E34.0,<br>K51.4-K51.419, K62.0-K62.3, K63.5, N60-N60.99, N84.0-<br>N84.1, N87-N87.9<br>209.4-209.57, 209.61, 209.63-209.67, 210.0-<br>217.8, 219-237.6, 237.70-237.72, 237.9-239.9,<br>569.0, 610-610.9, 622.1-622.2, 622.7<br>074.2, 074.21-074.23, 391-391.9, 392.0, 393-<br>398.99, 402-402.91, 410-416.0, 416.8-417.9,<br>420-425.5, 425.7-440.29, 440.4-445.89, 447-<br>454.9, 456, 456.3-457, 457.1, 457.8-458.1, 459-<br>459.9, 785-785.3, V12.5-V12.59, V15.1, V17.1,<br>V17.3-V17.49, V42.1-V42.2, V43.2-V43.5,<br>V45.0-V45.09, V45.81-V45.82, V47.2, V58.61,<br>V58.63, V58.66, V58.73, V81-V81.2                                                                                                                    |
| 2     | B.2    | Cardiovascular diseases               | B33.2-B33.24, D86.85, G45-G46.8, I01-I01.9, I02.0, I05-I09.9,<br>I11-I11.2, I11.9, I20-I21.6, I21.9-I27.0, I27.2-I28.9, I30-I38.0,<br>I39-I41.8, I42-I43.8, I44-I44.8, I45-I52.8, I60-I64, I64.1, I65-<br>I83.93, I86-I89.0, I89.9, I95.0-I95.1, I98, I98.8-I99.9, K75.1,<br>R00-R01.2, Z01.3-Z01.31, Z03.4-Z03.5, Z13.6, Z52.7, Z82.3-<br>Z82.49, Z86.7-Z86.79, Z94.1-Z94.3, Z95-Z95.9<br>391-391.9, 392.0, 393-398.99                                                                                                                                                                                                                                                                                                                                                          |
| 3     | B.2.1  | Rheumatic heart disease               | I01-I01.9, I02.0, I05-I09.9                                                                                                                                                                                                                                                                                                                                                                                                                                                                                                                                                                                                                                                                                                                                                      |
| 3     | B.2.2  | Ischemic heart disease                | I20-I21.6, I21.9-I25.9, Z82.4-Z82.49                                                                                                                                                                                                                                                                                                                                                                                                                                                                                                                                                                                                                                                                                                                                             |
| 3     | B.2.3  | Stroke                                | G45-G46.8, I60-I62, I62.9-I64, I64.1, I65-I69.998, Z82.3                                                                                                                                                                                                                                                                                                                                                                                                                                                                                                                                                                                                                                                                                                                         |
| 3     | B.2.4  | Hypertensive heart disease            | I11-I11.2, I11.9                                                                                                                                                                                                                                                                                                                                                                                                                                                                                                                                                                                                                                                                                                                                                                 |
| 3     | B.2.5  | Non-rheumatic valvular heart disease  | I34-I37.9                                                                                                                                                                                                                                                                                                                                                                                                                                                                                                                                                                                                                                                                                                                                                                        |
| 3     | B.2.6  | Cardiomyopathy and myocarditis        | B33.2-B33.20, B33.22-B33.24, D86.85, I40-I41.8, I42-I43.8,<br>I51.4-I51.6                                                                                                                                                                                                                                                                                                                                                                                                                                                                                                                                                                                                                                                                                                        |
| 3     | B.2.8  | Atrial fibrillation and flutter       | I48-I48.92                                                                                                                                                                                                                                                                                                                                                                                                                                                                                                                                                                                                                                                                                                                                                                       |
| 3     | B.2.10 | Peripheral artery disease             | I70.2-I70.92, I73-I73.9                                                                                                                                                                                                                                                                                                                                                                                                                                                                                                                                                                                                                                                                                                                                                          |
| 3     | B.2.11 | Endocarditis                          | B33.21, I33-I33.9, I38-I38.0, I39-I39.9                                                                                                                                                                                                                                                                                                                                                                                                                                                                                                                                                                                                                                                                                                                                          |
| 2     | B.3    | Chronic respiratory diseases          | D86-D86.2, D86.9, G47.3-G47.39, J30-J35.9, J37-J39.9, J41-<br>J42.4, J43-J46.0, J47-J47.9, J60-J68.9, J70.8-J70.9, J80-J80.9,<br>J82, J84-J84.9, J90-J90.0, J91, J91.8-J93.12, J93.8-J94.9, J96-<br>J96.92, J98-J99.8, R05.0-R06.9, R09-R09.89, R84-R84.9, R91-<br>R91.8, Z82.5<br>074.2, 074.23, 422-422.99, 425-425.5, 425.7-<br>425.9, 429.0-429.1<br>427.3-427.32<br>440.2-440.29, 440.4-440.9, 443-443.2, 443.8-<br>443.9<br>074.22, 421-421.9, 424, 424.4-424.99<br>135-135.9, 278.03, 327.2-327.29, 470, 470.9-<br>474.9, 476-479, 491-508.9, 512-513, 514-518.53,<br>518.8-519, 519.11-519.9, 786-786.9, 793.1-<br>793.2, 799.0-799.1, V07.1, V12.6-V12.60,<br>V12.69, V13.81, V14-V15.09, V15.84, V17.5-<br>V17.6, V19.6, V42.6, V43.81, V45.76, V58.74,<br>V81.3-V81.4 |
| 3     | B.3.1  | Chronic obstructive pulmonary disease | J41-J42.4, J43-J44.9                                                                                                                                                                                                                                                                                                                                                                                                                                                                                                                                                                                                                                                                                                                                                             |
| 3     | B.3.2  | Pneumoconiosis                        | J60-J65.0, J92.0                                                                                                                                                                                                                                                                                                                                                                                                                                                                                                                                                                                                                                                                                                                                                                 |
| 3     | B.3.3  | Asthma                                | J45-J46.0, Z82.5                                                                                                                                                                                                                                                                                                                                                                                                                                                                                                                                                                                                                                                                                                                                                                 |

| Level | Cause  | ICD10                                               | ICD9                                                                                                                                                                                                                                                                                                                                                                                        |                                                                                                                                                                                                                                                                                                                                                   |
|-------|--------|-----------------------------------------------------|---------------------------------------------------------------------------------------------------------------------------------------------------------------------------------------------------------------------------------------------------------------------------------------------------------------------------------------------------------------------------------------------|---------------------------------------------------------------------------------------------------------------------------------------------------------------------------------------------------------------------------------------------------------------------------------------------------------------------------------------------------|
| 3     | B.3.4  | Interstitial lung disease and pulmonary sarcoidosis | D86-D86.2, D86.9, J84-J84.9                                                                                                                                                                                                                                                                                                                                                                 | 135-135.9, 515, 515.9-516.9                                                                                                                                                                                                                                                                                                                       |
| 3     | B.3.5  | Other chronic respiratory diseases                  | J30-J35.9, J37-J39.9, J47-J47.9, J66-J68.9, J70.8-J70.9, J82, J90-J90.0, J91, J91.8-J92, J92.9-J93.12, J93.8-J94.9, J96.1-J96.8, J98-J99.8                                                                                                                                                                                                                                                  | 470, 470.9-474.9, 476-479, 494-495.9, 506-508.9, 512-513, 514-514.9, 515.0, 517-518.4, 518.8-518.81, 518.83-519, 519.11-519.9, V07.1, V12.6-V12.60, V12.69, V13.81, V14-V15.09, V15.84, V17.6, V19.6, V42.6, V43.81, V45.76, V58.74, V81.3-V81.4                                                                                                  |
| 2     | B.4    | Digestive diseases                                  | I84-I85.9, I98.2, K20-K23.8, K25-K31.9, K35-K38.9, K40-K42.9, K44-K46.9, K50-K51.319, K51.5-K52, K52.2-K52.9, K55-K62, K62.4-K62.6, K62.8-K63.4, K63.8-K67, K67.8-K68.1, K68.12-K68.9, K70-K75, K75.2, K75.4-K76.2, K76.4-K77.8, K80-K80.81, K81-K83.9, K85-K87.1, K90-K90.9, K92-K92.9, K93.8, R11-R19.8, R85-R85.9, Z13.81-Z13.818, Z43.1-Z43.4, Z52.6, Z83.7-Z83.79, Z87.1-Z87.19, Z94.4 | 455-455.9, 456.0-456.21, 530-530.85, 530.89-536.3, 536.8-538, 540-543.9, 550-551.1, 551.3-552.1, 552.3-553.1, 553.3-558.9, 560-560.39, 560.8-562.13, 564-564.1, 564.5-569, 569.1-569.5, 569.81-572, 572.2-579.2, 579.4-579.9, 784-784.99, 787-787.99, 789.9, 792.1-792.4, V12.7-V12.79, V18.5-V18.59, V42.7, V45.72, V45.75, V47.3, V58.75, V59.6 |
| 3     | B.4.1  | Cirrhosis and other chronic liver diseases          | I85-I85.9, I98.2, K70-K71, K71.3-K72, K72.1-K75, K75.2, K75.4-K76.2, K76.4-K77.8, R16-R18.9, Z52.6, Z94.4                                                                                                                                                                                                                                                                                   | 456.0-456.21, 570-572, 572.2-573.9, V42.7, V59.6                                                                                                                                                                                                                                                                                                  |
| 3     | B.4.2  | Upper digestive system diseases                     | K21-K21.9, K22.7-K22.719, K25-K30, R12                                                                                                                                                                                                                                                                                                                                                      | 530.11, 530.7-530.85, 530.89-536.3, 536.8-536.9, 787.1                                                                                                                                                                                                                                                                                            |
| 3     | B.4.3  | Appendicitis                                        | K35-K37.9                                                                                                                                                                                                                                                                                                                                                                                   | 540-542.9                                                                                                                                                                                                                                                                                                                                         |
| 3     | B.4.4  | Paralytic ileus and intestinal obstruction          | K56-K56.9                                                                                                                                                                                                                                                                                                                                                                                   | 560-560.39, 560.8-560.9, 569.87                                                                                                                                                                                                                                                                                                                   |
| 3     | B.4.5  | Inguinal, femoral, and abdominal hernia             | K40-K42.9, K44-K46.9                                                                                                                                                                                                                                                                                                                                                                        | 550-551.1, 551.3-552.1, 552.3-553.1, 553.3-553.9                                                                                                                                                                                                                                                                                                  |
| 3     | B.4.6  | Inflammatory bowel disease                          | K50-K51.319, K51.5-K52, K52.8-K52.9                                                                                                                                                                                                                                                                                                                                                         | 555-556.9, 558-558.9, 564.1, 569.5                                                                                                                                                                                                                                                                                                                |
| 3     | B.4.7  | Vascular intestinal disorders                       | K55-K55.9                                                                                                                                                                                                                                                                                                                                                                                   | 557-557.9, 569.84-569.86                                                                                                                                                                                                                                                                                                                          |
| 3     | B.4.8  | Gallbladder and biliary diseases                    | K80-K80.81, K81-K83.9, K87-K87.1                                                                                                                                                                                                                                                                                                                                                            | 574-576.9                                                                                                                                                                                                                                                                                                                                         |
| 3     | B.4.9  | Pancreatitis                                        | K85-K86.9                                                                                                                                                                                                                                                                                                                                                                                   | 577-577.9                                                                                                                                                                                                                                                                                                                                         |
| 3     | B.4.10 | Other digestive diseases                            | I84-I84.9, K20-K20.9, K22-K22.6, K22.8-K23.8, K31-K31.9, K38-K38.9, K52.2-K52.3, K57-K62, K62.4-K62.6, K62.8-K63.4, K63.8-K67, K67.8-K68.1, K68.12-K68.9, K71.0-K71.2, K72.0-K72.01, K90-K90.9, K92-K92.9, K93.8                                                                                                                                                                            | 455-455.9, 530-530.10, 530.12-530.6, 537-538, 543-543.9, 561-562.13, 564-564.09, 564.5-569, 569.1-569.49, 569.81-569.83, 569.89-569.9, 578-579.2, 579.4-579.9                                                                                                                                                                                     |
| 2     | B.5    | Neurological disorders                              | F00-F02.0, F02.2-F02.3, F02.8-F03.91, F06.2, G10-G10.0, G11-G13.8, G20-G21, G21.2-G24, G24.1-G25.0, G25.2-                                                                                                                                                                                                                                                                                  | 290-290.9, 294.0-294.9, 307.8-307.89, 315-315.9, 330-331.8, 331.82-333.91, 333.93-346.93,                                                                                                                                                                                                                                                         |

| Level | Cause | ICD10                                                                                                                                                                                                                                                                                                                                                                                                   | ICD9                                                                                                                                                                                                                                                                                                   |                                                                                                                                                                                                                                    |
|-------|-------|---------------------------------------------------------------------------------------------------------------------------------------------------------------------------------------------------------------------------------------------------------------------------------------------------------------------------------------------------------------------------------------------------------|--------------------------------------------------------------------------------------------------------------------------------------------------------------------------------------------------------------------------------------------------------------------------------------------------------|------------------------------------------------------------------------------------------------------------------------------------------------------------------------------------------------------------------------------------|
|       |       | G25.3, G25.5, G25.8-G26.0, G30-G31.1, G31.8-G32.89, G35-G35.0, G36-G37.9, G40-G41.9, G43-G44.89, G50-G54.1, G54.5-G62, G62.2-G65.2, G70-G71.19, G71.3-G72, G72.1-G73.7, G80-G83.9, G89-G93.6, G93.8-G95.29, G95.8-G96, G96.1, G96.12-G96.9, G98-G99.8, M33-M33.99, M60-M60.19, M60.8-M60.9, M79.7, R25-R27.9, R29-R29.91, R41-R42.0, R56-R56.9, R90-R90.89, Z03.3, Z13.85, Z13.858, Z82.0, Z86.6-Z86.69 | 348-348.9, 350-353.0, 353.5-357.5, 357.7-359.23, 359.29-359.9, 710.3-710.4, 725-725.9, 728-728.85, 728.87-728.9, 775.2, 780.3-780.59, 780.7-780.72, 780.96, 781-781.99, 793.0, 799.3-799.7, V17.2, V58.72                                                                                              |                                                                                                                                                                                                                                    |
| 3     | B.5.1 | Alzheimer's disease and other dementias                                                                                                                                                                                                                                                                                                                                                                 | F00-F02.0, F02.8-F03.91, F06.2, G30-G31.1, G31.8-G32.89                                                                                                                                                                                                                                                | 290-290.9, 294.0-294.9, 331-331.2, 331.6-331.7, 331.82, 331.89-331.9                                                                                                                                                               |
| 3     | B.5.2 | Parkinson's disease                                                                                                                                                                                                                                                                                                                                                                                     | F02.3, G20-G20.9                                                                                                                                                                                                                                                                                       | 332-332.0                                                                                                                                                                                                                          |
| 3     | B.5.3 | Idiopathic epilepsy                                                                                                                                                                                                                                                                                                                                                                                     | G40-G41.9, Z82.0                                                                                                                                                                                                                                                                                       | 345-345.91                                                                                                                                                                                                                         |
| 3     | B.5.4 | Multiple sclerosis                                                                                                                                                                                                                                                                                                                                                                                      | G35-G35.0                                                                                                                                                                                                                                                                                              | 340-340.9                                                                                                                                                                                                                          |
| 3     | B.5.6 | Headache disorders                                                                                                                                                                                                                                                                                                                                                                                      | G43-G44.89                                                                                                                                                                                                                                                                                             | 307.81, 339-339.89, 346-346.93                                                                                                                                                                                                     |
| 3     | B.5.7 | Other neurological disorders                                                                                                                                                                                                                                                                                                                                                                            | F02.2, G10-G10.0, G11-G13.8, G21, G21.2-G24, G24.1-G25.0, G25.2-G25.3, G25.5, G25.8-G26.0, G36-G37.9, G50-G54.1, G54.5-G62, G62.2-G65.2, G70-G71.19, G71.3-G72, G72.1-G73.7, G80-G83.9, G89-G93.6, G93.8-G95.29, G95.8-G96, G96.1, G96.12-G96.9, G98-G99.8, M33-M33.99, M60-M60.19, M60.8-M60.9, M79.7 | 307.8-307.80, 307.89, 330-330.9, 331.3-331.5, 331.8, 331.83, 332.1-333.91, 333.93-338.4, 341-344.9, 348-348.9, 350-353.0, 353.5-357.5, 357.7-359.23, 359.29-359.9, 710.3-710.4, 725-725.9, 728-728.85, 728.87-728.9, 775.2, 780.96 |
| 2     | B.6   | Mental disorders                                                                                                                                                                                                                                                                                                                                                                                        | F04-F06.1, F06.3-F07.0, F08-F09.9, F20-F34.9, F38-F52.9, F55-F55.8, F56-F99.0, G47-G47.29, G47.4-G47.9, R40-R40.4, R45-R46.89, R55-R55.0, Z03.2, Z04.6-Z04.72, Z13.4, Z64, Z81-Z81.0, Z81.8, Z86.5-Z86.59                                                                                              | 293-294, 295-302.9, 306-307.7, 307.9-310.1, 311-314.9, 316-319.9, 327-327.19, 327.3-327.8, 347-347.9, 780-780.2, 780.93, 780.97, 797-797.9, 799.2-799.29, V11.0-V11.2, V11.4-V12.0, V17-V17.0, V18.4, V40-V41.9, V79-V79.9         |
| 3     | B.6.1 | Schizophrenia                                                                                                                                                                                                                                                                                                                                                                                           | F20-F20.9, F25-F25.9                                                                                                                                                                                                                                                                                   | 295-295.35, 295.5-295.8                                                                                                                                                                                                            |
| 3     | B.6.2 | Depressive disorders                                                                                                                                                                                                                                                                                                                                                                                    | F32-F33.9, F34.1                                                                                                                                                                                                                                                                                       | 296.2-296.36, 300.4, 311-311.9                                                                                                                                                                                                     |
| 3     | B.6.3 | Bipolar disorder                                                                                                                                                                                                                                                                                                                                                                                        | F30-F31.9, F34.0                                                                                                                                                                                                                                                                                       | 296-296.16, 296.4-296.81                                                                                                                                                                                                           |
| 3     | B.6.4 | Anxiety disorders                                                                                                                                                                                                                                                                                                                                                                                       | F40-F44.9, F93-F93.2                                                                                                                                                                                                                                                                                   | 300-300.3, 308-309.9                                                                                                                                                                                                               |
| 3     | B.6.5 | Eating disorders                                                                                                                                                                                                                                                                                                                                                                                        | F50-F50.9                                                                                                                                                                                                                                                                                              | 307.1, 307.5-307.59                                                                                                                                                                                                                |
| 3     | B.6.7 | Attention-deficit/hyperactivity disorder                                                                                                                                                                                                                                                                                                                                                                | F90-F90.9                                                                                                                                                                                                                                                                                              | 314-314.9                                                                                                                                                                                                                          |
| 3     | B.6.8 | Conduct disorder                                                                                                                                                                                                                                                                                                                                                                                        | F91-F92.9                                                                                                                                                                                                                                                                                              | 312-312.9                                                                                                                                                                                                                          |



| Level | Cause  | ICD10                                            | ICD9                                                                                                                                                                                                                                                                                  |                                                                                                                                                                                                                                                                                                  |
|-------|--------|--------------------------------------------------|---------------------------------------------------------------------------------------------------------------------------------------------------------------------------------------------------------------------------------------------------------------------------------------|--------------------------------------------------------------------------------------------------------------------------------------------------------------------------------------------------------------------------------------------------------------------------------------------------|
| 3     | B.6.9  | Idiopathic developmental intellectual disability | F70-F79.9, Z81.0                                                                                                                                                                                                                                                                      | 317-319.9, V18.4                                                                                                                                                                                                                                                                                 |
| 3     | B.6.10 | Other mental disorders                           | F04-F06.1, F06.3-F07.0, F08-F09.9, F21-F24, F26-F29.9, F34, F34.8-F34.9, F38-F39, F45-F49, F51-F52.9, F55-F55.8, F56-F69.0, F80-F89.0, F93.3-F99.0, G47-G47.29, G47.4-G47.9, R40-R40.4, R45-R46.89, R55-R55.0, Z03.2, Z04.6-Z04.72, Z13.4, Z64, Z81, Z81.8, Z86.5-Z86.59              | 293-294, 295.4-295.45, 295.80-295.95, 296.82-298.9, 300.5-302.9, 306-307.0, 307.2-307.49, 307.6-307.7, 307.9, 310-310.1, 313-313.9, 316-316.9, 327-327.19, 327.3-327.8, 347-347.9, 780-780.2, 780.93, 780.97, 797-797.9, 799.2-799.29, V11.0-V11.2, V11.4-V12.0, V17-V17.0, V40-V41.9, V79-V79.9 |
| 2     | B.7    | Substance use disorders                          | E24.4, F10-F19.99, G31.2, G62.1, P96.1, R78.0-R78.9, X45-X45.9, X65-X65.9, Y15-Y15.9, Z81.1-Z81.4                                                                                                                                                                                     | 291-292.9, 303-305.93, 790.3, E850.0-E850.29, E860-E860.19, V11.3, V15.8-V15.83, V15.85-V15.86, nan                                                                                                                                                                                              |
| 3     | B.7.1  | Alcohol use disorders                            | E24.4, F10-F10.99, G31.2, G62.1, R78.0, X45-X45.9, X65-X65.9, Y15-Y15.9, Z81.1                                                                                                                                                                                                        | 291-291.9, 303-303.93, 305-305.03, 790.3, E860-E860.19, V11.3                                                                                                                                                                                                                                    |
| 3     | B.7.2  | Drug use disorders                               | F11-F19.99, P96.1, R78.1-R78.9, Z81.2-Z81.4                                                                                                                                                                                                                                           | 292-292.9, 304-304.93, 305.1-305.93, E850.0-E850.29, V15.8-V15.83, V15.85-V15.86, nan                                                                                                                                                                                                            |
| 2     | B.8    | Diabetes and kidney diseases                     | D63.1, E08-E08.9, E10-E14.9, I12-I13.9, N00-N08.8, N15.0, N17-N19, Q60-Q63.2, Q63.8-Q63.9, Q64.2-Q64.9, R73-R73.9, Z13.1, Z49-Z49.32, Z52.4, Z83.3, Z99.2                                                                                                                             | 249-250.99, 285.21, 362.0-362.07, 403-404.93, 580-587.9, 753.0-753.4, 753.6-753.9, 790.2-790.29, V13.03-V13.09, V18-V18.0, V18.6, V18.69, V42.0, V42.83, V45.1-V45.12, V45.73, V45.85, V56-V56.8, V58.67, V59.4, V77.1, V81.5-V81.6                                                              |
| 3     | B.8.1  | Diabetes mellitus                                | E08-E08.11, E08.3-E08.9, E10-E10.11, E10.3-E11.1, E11.3-E12.1, E12.3-E13.11, E13.3-E14.1, E14.3-E14.9, R73-R73.9, Z13.1, Z83.3                                                                                                                                                        | 249-249.31, 249.5-250.39, 250.5-250.99, 362.0-362.07, 790.2-790.29, V18-V18.0, V42.83, V45.85, V58.67, V77.1                                                                                                                                                                                     |
| 3     | B.8.2  | Chronic kidney disease                           | D63.1, E08.2-E08.29, E10.2-E10.29, E11.2-E11.29, E12.2, E13.2-E13.29, E14.2, I12-I13.9, N02-N08.8, N15.0, N17-N19, Q60-Q63.2, Q63.8-Q63.9, Q64.2-Q64.9, Z49-Z49.32, Z52.4, Z99.2                                                                                                      | 249.4-249.41, 250.4-250.49, 285.21, 403-404.93, 581-587.9, 753.0-753.4, 753.6-753.9, V13.03-V13.09, V18.6, V18.69, V42.0, V45.1-V45.12, V45.73, V56-V56.8, V59.4, V81.5-V81.6                                                                                                                    |
| 3     | B.8.3  | Acute glomerulonephritis                         | N00-N01.9                                                                                                                                                                                                                                                                             | 580-580.9                                                                                                                                                                                                                                                                                        |
| 2     | B.9    | Skin and subcutaneous diseases                   | A46-A46.0, A66-A67.3, A67.9, B07-B09, B35-B36.9, B85-B88.9, D86.3, E80.1-E80.29, I89.1-I89.8, L00-L05.92, L08-L08.9, L10-L14.0, L20-L23.2, L23.4-L27, L27.2-L30.9, L40-L45, L49-L54.0, L56, L56.2-L57.9, L59-L60.9, L62-L64, L64.8-L68.9, L70-L75.9, L80-L92.9, L94-L95.9, L97-L99.8, | 035-035.9, 040.0, 078.0-078.19, 102-103.9, 110-111.9, 132-134.9, 136.1, 457.2-457.3, 680-709.3, 709.8-709.9, 728.86, 782-782.9, 785.4, V13.3, V19.4, V42.3, V43.83, V58.77, V59.1, V82.0                                                                                                         |

| Level | Cause  | ICD10                                                                  | ICD9                                                                                                                                                                                                                                  |
|-------|--------|------------------------------------------------------------------------|---------------------------------------------------------------------------------------------------------------------------------------------------------------------------------------------------------------------------------------|
|       |        | M72.5-M72.6, N49.2-N49.3, R20-R24.0, Z20.7, Z41.1, Z84.0, Z87.2, Z94.5 |                                                                                                                                                                                                                                       |
| 3     | B.9.1  | Dermatitis                                                             | 690-692.7, 692.79-692.9                                                                                                                                                                                                               |
| 3     | B.9.2  | Psoriasis                                                              | 696-696.9                                                                                                                                                                                                                             |
| 3     | B.9.3  | Bacterial skin diseases                                                | 035-035.9, 040.0, 102-103.9, 457.2-457.3, 680-689, 728.86, 785.4                                                                                                                                                                      |
| 3     | B.9.4  | Scabies                                                                | 133-133.6                                                                                                                                                                                                                             |
| 3     | B.9.5  | Fungal skin diseases                                                   | 110-111.9                                                                                                                                                                                                                             |
| 3     | B.9.6  | Viral skin diseases                                                    | 078.0-078.19                                                                                                                                                                                                                          |
| 3     | B.9.7  | Acne vulgaris                                                          | 706.0-706.1                                                                                                                                                                                                                           |
| 3     | B.9.8  | Alopecia areata                                                        | 704.0-704.09                                                                                                                                                                                                                          |
| 3     | B.9.9  | Pruritus                                                               | 698-699                                                                                                                                                                                                                               |
| 3     | B.9.10 | Urticaria                                                              | 708-708.9                                                                                                                                                                                                                             |
| 3     | B.9.11 | Decubitus ulcer                                                        | 707-707.09, 707.2-707.7                                                                                                                                                                                                               |
| 3     | B.9.12 | Other skin and subcutaneous diseases                                   | 132-132.9, 133.8-134.9, 136.1, 692.70-692.77, 693-695.9, 697-697.9, 700-704, 704.1-706, 706.2-706.9, 707.1-707.19, 707.8-707.9, 709-709.3, 709.8-709.9                                                                                |
| 2     | B.10   | Sense organ diseases                                                   | 077-077.99, 360-360.44, 360.8-362, 362.1-374.85, 374.87-376.52, 376.8-379.59, 379.8-380.9, 384-389.9, 744.0, V19.0-V19.3, V42.5, V43.0-V43.1, V45.6-V45.69, V45.78, V48.4-V48.5, V50.3, V58.71, V59.5, V74.4, V80-V80.0, V80.09-V80.3 |
| 3     | B.10.1 | Blindness and vision loss                                              | 360.8-362, 362.1-363.9, 365-369.9, 377-378.9                                                                                                                                                                                          |
| 3     | B.10.2 | Age-related and other hearing loss                                     | 384-385.9, 387-387.9, 388.1-388.2, 389-389.9, 744.0                                                                                                                                                                                   |
| 3     | B.10.3 | Other sense organ diseases                                             | 077-077.99, 360-360.44, 364-364.9, 370-374.85, 374.87-376.52, 376.8-376.9, 379-379.59, 379.8-380.9, 386-386.9, 388-388.02, 388.3-388.9                                                                                                |

| Level | Cause  | ICD10                           | ICD9                                                                                                                                                                                                                                                                                                                                                                                                                                                                                                                                  |                                                                                                                                                                                                                                                                                                    |
|-------|--------|---------------------------------|---------------------------------------------------------------------------------------------------------------------------------------------------------------------------------------------------------------------------------------------------------------------------------------------------------------------------------------------------------------------------------------------------------------------------------------------------------------------------------------------------------------------------------------|----------------------------------------------------------------------------------------------------------------------------------------------------------------------------------------------------------------------------------------------------------------------------------------------------|
| 2     | B.11   | Musculoskeletal disorders       | G54.2-G54.4, I27.1, L93-L93.2, M00-M03.6, M05-M10.19, M10.3-M25.9, M30-M32.9, M34-M36.8, M40-M43.9, M45-M49, M49.2-M51.9, M53-M54.9, M61-M63.89, M65-M68.8, M70-M72.4, M72.8-M73, M75-M77.9, M79-M79.676, M79.8-M87.09, M87.2-M89.59, M89.7-M95.9, M99-M99.9, Z13.82-Z13.83, Z82.6-Z82.69, Z87.3-Z87.39                                                                                                                                                                                                                               | 274-274.9, 353.1-353.4, 416.1, 446-446.9, 710-710.2, 710.5-724.9, 726-727.9, 729-730.39, 730.7-739.9, V13.4-V13.59, V17.7-V17.89, V43.6-V43.8, V58.64-V58.65, V58.78, V77.5, V82.1-V82.2                                                                                                           |
| 3     | B.11.1 | Rheumatoid arthritis            | M05-M05.9, M08-M09.8                                                                                                                                                                                                                                                                                                                                                                                                                                                                                                                  | 714-714.9                                                                                                                                                                                                                                                                                          |
| 3     | B.11.2 | Osteoarthritis                  | M16-M18.9                                                                                                                                                                                                                                                                                                                                                                                                                                                                                                                             | 715-715.98                                                                                                                                                                                                                                                                                         |
| 3     | B.11.3 | Low back pain                   | G54.4, M47.015-M47.019, M47.15-M47.18, M47.25-M47.28, M47.815-M47.818, M47.896-M47.899, M48.05-M48.08, M48.16-M48.19, M48.25-M48.27, M48.35-M48.38, M48.45-M48.48, M48.55-M48.58, M49.85-M49.88, M51.05-M51.07, M51.15-M51.17, M51.25-M51.27, M51.35-M51.37, M51.45-M51.47, M51.85-M51.87, M53.3, M53.85-M53.88, M54.05-M54.09, M54.15-M54.18, M54.3-M54.5, M99.03-M99.04, M99.13-M99.14, M99.23-M99.24, M99.33-M99.34, M99.43-M99.44, M99.53-M99.54, M99.63-M99.64, M99.73-M99.74, M99.83-M99.84                                     | 353.1, 353.4, 721.3, 721.42, 722.10, 722.32, 722.52, 722.73, 722.83, 722.93, 724.02-724.03, 724.2-724.3, 724.6-724.79                                                                                                                                                                              |
| 3     | B.11.4 | Neck pain                       | G54.2, M47.011-M47.013, M47.11-M47.13, M47.21-M47.23, M47.811-M47.813, M47.892-M47.894, M48.01-M48.03, M48.12-M48.14, M48.21-M48.23, M48.31-M48.33, M48.41-M48.43, M48.51-M48.53, M49.81-M49.83, M50-M50.93, M53.0-M53.1, M53.81-M53.83, M54.01-M54.03, M54.11-M54.13, M54.2, M54.81, M99.01, M99.11, M99.21, M99.31, M99.41, M99.51, M99.61, M99.71, M99.81                                                                                                                                                                          | 353.2, 721.0-721.1, 722.0, 722.71, 722.81, 722.91, 723-723.9                                                                                                                                                                                                                                       |
| 3     | B.11.5 | Gout                            | M10-M10.19, M10.3-M10.9, M1A00X0-M1A9XX1                                                                                                                                                                                                                                                                                                                                                                                                                                                                                              | 274-274.9, 712.0-712.09                                                                                                                                                                                                                                                                            |
| 3     | B.11.6 | Other musculoskeletal disorders | G54.3, I27.1, L93-L93.2, M00-M03.6, M06-M07.69, M11-M15.9, M19-M19.93, M20-M25.9, M30-M32.9, M34-M36.8, M40-M43.9, M45-M47.01, M47.014, M47.02-M47.10, M47.14, M47.2-M47.20, M47.24, M47.8-M47.81, M47.814, M47.819-M47.891, M47.895, M47.9-M48.00, M48.04, M48.1-M48.11, M48.15, M48.2-M48.20, M48.24, M48.3-M48.30, M48.34, M48.4-M48.40, M48.44, M48.5-M48.50, M48.54, M48.8-M49, M49.2-M49.80, M49.84, M49.89, M51-M51.04, M51.1-M51.14, M51.2-M51.24, M51.3-M51.34, M51.4-M51.44, M51.8-M51.84, M51.9, M53, M53.2, M53.8-M53.80, | 353.3, 416.1, 446-446.9, 710-710.2, 710.5-712, 712.1-713.8, 716-721, 721.2, 721.4-721.41, 721.5-722, 722.1, 722.11-722.31, 722.39-722.51, 722.6-722.70, 722.72, 722.8-722.80, 722.82, 722.9-722.90, 722.92, 724-724.01, 724.09-724.1, 724.4-724.5, 724.8-724.9, 726-727.9, 729-730.39, 730.7-739.9 |

| Level | Cause  | ICD10                                                                                                                                                                                                                                                                                                                                                                                                                                                                                                                                                                                                                                                                                                                                                                                                                                                                                                                                                                                                                               | ICD9                                                                                                                                                                                                                                                                                                                                                                                                                                                                                                                                                                                                                                                                                                                                                                                   |
|-------|--------|-------------------------------------------------------------------------------------------------------------------------------------------------------------------------------------------------------------------------------------------------------------------------------------------------------------------------------------------------------------------------------------------------------------------------------------------------------------------------------------------------------------------------------------------------------------------------------------------------------------------------------------------------------------------------------------------------------------------------------------------------------------------------------------------------------------------------------------------------------------------------------------------------------------------------------------------------------------------------------------------------------------------------------------|----------------------------------------------------------------------------------------------------------------------------------------------------------------------------------------------------------------------------------------------------------------------------------------------------------------------------------------------------------------------------------------------------------------------------------------------------------------------------------------------------------------------------------------------------------------------------------------------------------------------------------------------------------------------------------------------------------------------------------------------------------------------------------------|
| 2     | B.12   | Other non-communicable diseases                                                                                                                                                                                                                                                                                                                                                                                                                                                                                                                                                                                                                                                                                                                                                                                                                                                                                                                                                                                                     |                                                                                                                                                                                                                                                                                                                                                                                                                                                                                                                                                                                                                                                                                                                                                                                        |
|       |        | M53.84, M53.9-M54.00, M54.04, M54.1-M54.10, M54.14, M54.6-M54.8, M54.89-M54.9, M61-M63.89, M65-M68.8, M70-M72.4, M72.8-M73, M75-M77.9, M79-M79.676, M79.8-M87.09, M87.2-M89.59, M89.7-M95.9, M99-M99.00, M99.02, M99.05-M99.10, M99.12, M99.15-M99.20, M99.22, M99.25-M99.30, M99.32, M99.35-M99.40, M99.42, M99.45-M99.50, M99.52, M99.55-M99.60, M99.62, M99.65-M99.70, M99.72, M99.75-M99.80, M99.82, M99.85-M99.9                                                                                                                                                                                                                                                                                                                                                                                                                                                                                                                                                                                                               |                                                                                                                                                                                                                                                                                                                                                                                                                                                                                                                                                                                                                                                                                                                                                                                        |
|       |        | B37.3-B37.49, C7A00-C7B8, D25-D26, D3A00-D3A8, D55-D61.9, D64-D69.49, D69.6-D70.0, D70.4-D77, D80-D84.9, D86.8, D86.82-D86.84, D86.86-D86.89, D89-D89.2, D89.8, D89.82-D89.9, E03-E03.1, E03.3-E06.3, E06.5-E07.9, E15-E16, E16.1-E16.9, E20-E23.0, E23.2-E24.1, E24.3, E24.8-E27.2, E27.4-E32.9, E34, E34.1-E35.8, E65-E66.09, E66.2-E68, E70-E80.09, E80.3-E85.9, E88-E88.9, E90-E998, G71.2, K00-K08.499, K08.8-K14.9, M26-M27.9, N10-N13.9, N15, N15.1-N16.8, N20-N23.0, N25-N29, N29.1-N30.31, N30.8-N37.8, N39-N46.02, N46.022-N46.12, N46.122-N49.1, N49.8-N52.1, N52.8-N53.9, N61-N64.9, N72-N72.0, N75-N77.8, N80-N81.9, N83-N84, N84.2-N86, N88-N95.9, N97-N98.9, P96.0, Q00-Q07.9, Q10-Q15.9, Q17-Q18.9, Q20-Q28.9, Q30-Q45.9, Q50-Q56.4, Q63.3, Q64-Q64.19, Q65-Q87.89, Q89-Q89.8, Q90-Q93.9, Q95-Q99.9, R30-R37, R39-R39.9, R86-R87.9, Z01.2-Z01.21, Z01.4-Z01.7, Z13.7-Z13.79, Z13.84, Z14-Z15.89, Z31-Z31.9, Z43.5-Z43.7, Z82.7-Z82.79, Z83.4-Z83.49, Z84.1-Z84.2, Z86.1-Z86.19, Z87.4-Z87.448, Z87.7-Z87.798, Z96.5 | 112.1-112.2, 218-218.9, 237.7, 237.73-237.79, 240-244, 244.8-246.9, 251-251.2, 251.4-253.6, 253.8-259.9, 270-273.9, 275-278.02, 278.1-279.49, 279.6-279.9, 282-285.0, 285.8-289.9, 520-525.54, 525.8-526.61, 526.69-529.9, 588-595.81, 595.89-596.8, 596.89-598.1, 598.8-609, 611-611.9, 616-618.9, 620-622.0, 622.3-622.6, 622.8-629.9, 740-744, 744.00-753, 753.5, 754-759.9, 775.3, 788-788.99, 799.81, V07.31, V07.4-V07.59, V12.2-V12.49, V13.0-V13.02, V13.2, V13.29, V13.6-V13.69, V18.1-V18.19, V18.61, V18.7, V18.9, V19.5, V19.7-V19.8, V26-V26.9, V43.82, V45.71, V45.74, V45.83-V45.84, V45.86, V47.4-V47.5, V49.81-V49.82, V58.5, V58.76, V59.7-V59.74, V72.2-V72.31, V77.0, V77.3-V77.4, V77.6-V77.8, V77.91, V78, V78.2-V78.9, V82.3, V85-V85.45, V85.51, V85.53-V85.54 |
| 3     | B.12.1 | Congenital birth defects                                                                                                                                                                                                                                                                                                                                                                                                                                                                                                                                                                                                                                                                                                                                                                                                                                                                                                                                                                                                            |                                                                                                                                                                                                                                                                                                                                                                                                                                                                                                                                                                                                                                                                                                                                                                                        |
|       |        | G71.2, P96.0, Q00-Q07.9, Q10-Q15.9, Q17-Q18.9, Q20-Q28.9, Q30-Q45.9, Q50-Q56.4, Q63.3, Q64-Q64.19, Q65-Q87.89, Q89-Q89.8, Q90-Q93.9, Q95-Q99.9, Z13.7-Z13.79, Z14-Z15.89, Z82.7-Z82.79, Z87.7-Z87.798                                                                                                                                                                                                                                                                                                                                                                                                                                                                                                                                                                                                                                                                                                                                                                                                                               | 237.7, 237.73-237.79, 740-744, 744.00-753, 753.5, 754-759.9, V13.6-V13.69, V18.61, V18.9, V19.5, V19.7-V19.8, V82.3                                                                                                                                                                                                                                                                                                                                                                                                                                                                                                                                                                                                                                                                    |
| 3     | B.12.2 | Urinary diseases and male infertility                                                                                                                                                                                                                                                                                                                                                                                                                                                                                                                                                                                                                                                                                                                                                                                                                                                                                                                                                                                               |                                                                                                                                                                                                                                                                                                                                                                                                                                                                                                                                                                                                                                                                                                                                                                                        |
|       |        | N10-N13.9, N15, N15.1-N16.8, N20-N23.0, N25-N29, N29.1-N30.31, N30.8-N37.8, N39-N46.02, N46.022-N46.12, N46.122-N49.1, N49.8-N52.1, N52.8-N53.9, R86-R86.9, Z43.5-Z43.7, Z84.1-Z84.2                                                                                                                                                                                                                                                                                                                                                                                                                                                                                                                                                                                                                                                                                                                                                                                                                                                | 588-595.81, 595.89-596.8, 596.89-598.1, 598.8-609, 788.3-788.39, 788.91, V13.0-V13.02, V26.5, V26.52, V45.74, V47.4, V58.76                                                                                                                                                                                                                                                                                                                                                                                                                                                                                                                                                                                                                                                            |

| Level | Cause  | ICD10                                             | ICD9                                                                                                                                                                                                                                                                                                                                                                             |                                                                                                                                                                                                                                                                                                                                                                                                                                                                                                                                                       |
|-------|--------|---------------------------------------------------|----------------------------------------------------------------------------------------------------------------------------------------------------------------------------------------------------------------------------------------------------------------------------------------------------------------------------------------------------------------------------------|-------------------------------------------------------------------------------------------------------------------------------------------------------------------------------------------------------------------------------------------------------------------------------------------------------------------------------------------------------------------------------------------------------------------------------------------------------------------------------------------------------------------------------------------------------|
| 3     | B.12.3 | Gynecological diseases                            | B37.3-B37.49, D25-D26, E28.2, N61-N64.9, N72-N72.0, N75-N77.8, N80-N81.9, N83-N84, N84.2-N86, N88-N95.9, N97-N98.9, R30-R37, R39-R39.9, R87-R87.9, Z01.4-Z01.7, Z31-Z31.9, Z86.1-Z86.19, Z87.4-Z87.448                                                                                                                                                                           | 112.1-112.2, 218-218.9, 256.4, 611-611.9, 616-618.9, 620-622.0, 622.3-622.6, 622.8-629.9, 788-788.29, 788.4-788.9, 788.99, 799.81, V07.4-V07.59, V13.2, V13.29, V18.7, V26-V26.49, V26.51, V26.8-V26.9, V43.82, V45.71, V45.83, V47.5, V49.81, V59.7-V59.74, V72.3-V72.31                                                                                                                                                                                                                                                                             |
| 3     | B.12.4 | Hemoglobinopathies and hemolytic anemias          | D55-D61.9, D64-D64.8                                                                                                                                                                                                                                                                                                                                                             | 282-285.0, 285.8-285.9, V78, V78.2-V78.9                                                                                                                                                                                                                                                                                                                                                                                                                                                                                                              |
| 3     | B.12.5 | Endocrine, metabolic, blood, and immune disorders | C7A00-C7B8, D3A00-D3A8, D66-D69.49, D69.6-D70.0, D70.4-D77, D80-D84.9, D86.8, D86.82-D86.84, D86.86-D86.89, D89-D89.2, D89.8, D89.82-D89.9, E03-E03.1, E03.3-E06.3, E06.5-E07.9, E15-E16, E16.1-E16.9, E20-E23.0, E23.2-E24.1, E24.3, E24.8-E27.2, E27.4-E28.1, E28.3-E32.9, E34, E34.1-E35.8, E65-E66.09, E66.2-E68, E70-E80.09, E80.3-E85.9, E88-E88.9, E90-E998, Z83.4-Z83.49 | 240-244, 244.8-246.9, 251-251.2, 251.4-253.6, 253.8-256.39, 256.8-259.9, 270-273.9, 275-278.02, 278.1-279.49, 279.6-279.9, 286-289.9, 775.3, V12.2-V12.49, V18.1-V18.19, V45.86, V77.0, V77.3-V77.4, V77.6-V77.8, V77.91, V85-V85.45, V85.51, V85.53-V85.54                                                                                                                                                                                                                                                                                           |
| 3     | B.12.6 | Oral disorders                                    | K00-K08.499, K08.8-K14.9, M26-M27.9, Z01.2-Z01.21, Z13.84, Z96.5                                                                                                                                                                                                                                                                                                                 | 520-525.54, 525.8-526.61, 526.69-529.9, V07.31, V45.84, V49.82, V58.5, V72.2                                                                                                                                                                                                                                                                                                                                                                                                                                                                          |
| 2     | C.1    | Transport injuries                                | V00-V86.99, V87.2-V87.3, V88.2-V88.3, V90-V98.8                                                                                                                                                                                                                                                                                                                                  | E800-E800.3, E801-E801.3, E802-E802.3, E803-E803.3, E804-E804.3, E805-E805.3, E806-E806.3, E807-E807.3, E810.0-E810.7, E811.0-E811.7, E812.0-E812.7, E813.0-E813.7, E814.0-E814.7, E815.0-E815.7, E816.0-E816.7, E817.0-E817.7, E818.0-E818.7, E819.0-E819.7, E820.0-E820.7, E821.0-E821.7, E822.0-E822.7, E823.0-E823.7, E824.0-E824.7, E825.0-E825.7, E826.0-E826.4, E827.0-E827.4, E828.0-E828.4, E829.0-E829.4, E830-E838.9, E840-E849.9, E929.1, V03, V07.8-V07.9, V13, V13.8, V13.9, V15.2, V15.3, V15.9, V19, V42, V42.8, V42.9-V43, V47-V47.1 |
| 3     | C.1.1  | Road injuries                                     | V01-V04.99, V06-V80.929, V82-V82.9, V87.2-V87.3                                                                                                                                                                                                                                                                                                                                  | E800.3, E801.3, E802.3, E803.3, E804.3, E805.3, E806.3, E807.3, E810.0-E810.6, E811.0-E811.7, E812.0-E812.7, E813.0-E813.7, E814.0-E814.7, E815.0-E815.7, E816.0-E816.7, E817.0-E817.7, E818.0-E818.7, E819.0-E819.7, E820.0-E820.6, E821.0-E821.6, E822.0-E822.7, E823.0-                                                                                                                                                                                                                                                                            |

| Level | Cause | ICD10                          | ICD9                                                                                                                                                                                                                                                                                                                                                                                                                                                                                                                                                                                                                                                                                                                                                                                                                                                                                                                                                                                                                                     |                                                                                                                                                                                                                                                                                                                                                                                                                                                                                                                                                                                                                                      |
|-------|-------|--------------------------------|------------------------------------------------------------------------------------------------------------------------------------------------------------------------------------------------------------------------------------------------------------------------------------------------------------------------------------------------------------------------------------------------------------------------------------------------------------------------------------------------------------------------------------------------------------------------------------------------------------------------------------------------------------------------------------------------------------------------------------------------------------------------------------------------------------------------------------------------------------------------------------------------------------------------------------------------------------------------------------------------------------------------------------------|--------------------------------------------------------------------------------------------------------------------------------------------------------------------------------------------------------------------------------------------------------------------------------------------------------------------------------------------------------------------------------------------------------------------------------------------------------------------------------------------------------------------------------------------------------------------------------------------------------------------------------------|
| 3     | C.1.2 | Other transport injuries       | V00-V00.898, V05-V05.99, V81-V81.9, V83-V86.99, V88.2-V88.3, V90-V98.8                                                                                                                                                                                                                                                                                                                                                                                                                                                                                                                                                                                                                                                                                                                                                                                                                                                                                                                                                                   | E823.7, E824.0-E824.7, E825.0-E825.7, E826.0-E826.1, E826.3-E826.4, E827.0, E827.3-E827.4, E828.0, E828.4, E829.0-E829.4, V03, V07.8-V07.9, V13, V13.8, V13.9, V15.2, V15.3, V15.9, V19, V42, V42.8, V42.9-V43, V47-V47.1<br>E800-E800.2, E801-E801.2, E802-E802.2, E803-E803.2, E804-E804.2, E805-E805.2, E806-E806.2, E807-E807.2, E810.7, E820.7, E821.7, E826.2, E827.2, E828.2, E830-E838.9, E840-E849.9, E929.1                                                                                                                                                                                                                |
| 2     | C.2   | Unintentional injuries         | D69.5-D69.59, D70.1-D70.2, D78-D78.89, D89.81-D89.813, E03.2, E06.4, E09-E09.9, E16.0, E23.1, E24.2, E27.3, E36-E36.8, E66.1, E86.02-E87.99, E89-E89.9, G21.0-G21.19, G24.0-G24.09, G25.1, G25.4, G25.6-G25.79, G62.0, G72.0, G93.7, G96.0, G96.11, G97-G97.9, H02.81-H02.819, H05.33-H05.339, H05.42-H05.53, H44.6-H44.799, H59-H59.89, H91.0-H91.09, H95-H95.9, I95.2-I95.81, I97-I97.9, J70-J70.5, J95-J95.9, K08.5-K08.59, K43-K43.9, K52.0, K62.7, K68.11, K91-K91.9, K94-K95.89, L23.3, L27.0-L27.1, L55-L55.9, L56.0-L56.1, L58-L58.9, L64.0, L76-L76.82, M10.2-M10.29, M60.2-M60.28, M87.1-M87.19, M96-M96.9, N14-N14.4, N30.4-N30.41, N46.021, N46.121, N52.2-N52.39, N65-N65.1, N99-N99.9, P93-P93.8, P96.2, P96.5, R50.2-R50.83, W00-W46.2, W49-W62.9, W64-W70.9, W73-W81.9, W83-W94.9, W97.9, W99-X06.9, X08-X44.9, X46-X58.9, Y10-Y14.9, Y16-Y19.9, Y40-Y84.9, Y88-Y88.3, Z21.0, Z42-Z43.0, Z43.8-Z43.9, Z48-Z48.9, Z51-Z51.9, Z88-Z88.9, Z92-Z94.0, Z94.6, Z94.8-Z94.9, Z96-Z96.49, Z96.6-Z97.2, Z97.8-Z99.12, Z99.3-Z99.9 | 244.0-244.1, 244.3, 251.3, 253.7, 279.5-279.53, 331.81, 333.92, 349-349.9, 357.6, 359.24, 360.5-360.69, 374.86, 376.6, 379.6-379.63, 440.3-440.32, 457.0, 458.2-458.29, 518.6-518.7, 519.0-519.1, 525.6-525.79, 526.62-526.63, 530.86-530.87, 536.4-536.49, 539-539.9, 551.2-551.29, 552.2-552.29, 553.2-553.29, 564.2-564.4, 569.6-569.8, 579.3, 595.82, 596.81-596.83, 598.2, 612-612.1, 709.4, 770.1-770.18, 779.4-779.5, 780.62-780.66, 995.89, E850.3-E858.99, E862-E869.99, E870-E876.9, E878-E879.9, E880-E886.99, E888-E928.89, E929.2-E929.5, E930-E949.9, V44-V45, V45.2-V45.4, V45.7, V45.77, V45.79-V45.8, V45.87-V45.89 |
| 3     | C.2.1 | Falls                          | W00-W19.9                                                                                                                                                                                                                                                                                                                                                                                                                                                                                                                                                                                                                                                                                                                                                                                                                                                                                                                                                                                                                                | E880-E886.99, E888-E888.9, E929.3                                                                                                                                                                                                                                                                                                                                                                                                                                                                                                                                                                                                    |
| 3     | C.2.2 | Drowning                       | W65-W70.9, W73-W74.9                                                                                                                                                                                                                                                                                                                                                                                                                                                                                                                                                                                                                                                                                                                                                                                                                                                                                                                                                                                                                     | E910-E910.99                                                                                                                                                                                                                                                                                                                                                                                                                                                                                                                                                                                                                         |
| 3     | C.2.3 | Fire, heat, and hot substances | X00-X06.9, X08-X19.9                                                                                                                                                                                                                                                                                                                                                                                                                                                                                                                                                                                                                                                                                                                                                                                                                                                                                                                                                                                                                     | E890-E899.09, E924-E924.99, E929.4                                                                                                                                                                                                                                                                                                                                                                                                                                                                                                                                                                                                   |
| 3     | C.2.4 | Poisonings                     | E86.02-E86.99, J70.5, X40-X44.9, X46-X49.9, Y10-Y14.9, Y16-Y19.9                                                                                                                                                                                                                                                                                                                                                                                                                                                                                                                                                                                                                                                                                                                                                                                                                                                                                                                                                                         | E850.3-E858.99, E862-E869.99, E929.2                                                                                                                                                                                                                                                                                                                                                                                                                                                                                                                                                                                                 |
| 3     | C.2.5 | Exposure to mechanical forces  | W20-W38.9, W40-W43.9, W45.0-W45.2, W46-W46.2, W49-W52                                                                                                                                                                                                                                                                                                                                                                                                                                                                                                                                                                                                                                                                                                                                                                                                                                                                                                                                                                                    | E916-E922.99, E928.1-E928.7                                                                                                                                                                                                                                                                                                                                                                                                                                                                                                                                                                                                          |

| Level | Cause  | ICD10                                | ICD9                                                                                                                                                                                                                                                                                                                                                                                                                                                                                                                                                                                                                                                                                                                                                                                                                                            |                                                                                                                                                                                                                                                                                                                                                                                                                                                                                                           |
|-------|--------|--------------------------------------|-------------------------------------------------------------------------------------------------------------------------------------------------------------------------------------------------------------------------------------------------------------------------------------------------------------------------------------------------------------------------------------------------------------------------------------------------------------------------------------------------------------------------------------------------------------------------------------------------------------------------------------------------------------------------------------------------------------------------------------------------------------------------------------------------------------------------------------------------|-----------------------------------------------------------------------------------------------------------------------------------------------------------------------------------------------------------------------------------------------------------------------------------------------------------------------------------------------------------------------------------------------------------------------------------------------------------------------------------------------------------|
| 3     | C.2.6  | Adverse effects of medical treatment | D69.5-D69.59, D70.1-D70.2, D78-D78.89, D89.81-D89.813, E03.2, E06.4, E09-E09.9, E16.0, E23.1, E24.2, E27.3, E36-E36.8, E66.1, E87.0-E87.99, E89-E89.9, G21.0-G21.19, G24.0-G24.09, G25.1, G25.4, G25.6-G25.79, G62.0, G72.0, G93.7, G96.0, G96.11, G97-G97.9, H05.33-H05.339, H05.42-H05.53, H59-H59.89, H91.0-H91.09, H95-H95.9, I95.2-I95.81, I97-I97.9, J70-J70.4, J95-J95.9, K08.5-K08.59, K43-K43.9, K52.0, K62.7, K68.11, K91-K91.9, K94-K95.89, L23.3, L27.0-L27.1, L56.0-L56.1, L64.0, L76-L76.82, M10.2-M10.29, M87.1-M87.19, M96-M96.9, N14-N14.4, N30.4-N30.41, N46.021, N46.121, N52.2-N52.39, N65-N65.1, N99-N99.9, P93-P93.8, P96.2, P96.5, R50.2-R50.83, Y40-Y84.9, Y88-Y88.3, Z21.0, Z42-Z43.0, Z43.8-Z43.9, Z48-Z48.9, Z51-Z51.9, Z88-Z88.9, Z92-Z94.0, Z94.6, Z94.8-Z94.9, Z96-Z96.49, Z96.6-Z97.2, Z97.8-Z99.12, Z99.3-Z99.9 | 244.0-244.1, 244.3, 251.3, 253.7, 279.5-279.53, 331.81, 333.92, 349-349.9, 357.6, 359.24, 379.6-379.63, 440.3-440.32, 457.0, 458.2-458.29, 518.6-518.7, 519.0-519.1, 525.6-525.79, 526.62-526.63, 530.86-530.87, 536.4-536.49, 539-539.9, 551.2-551.29, 552.2-552.29, 553.2-553.29, 564.2-564.4, 569.6-569.8, 579.3, 595.82, 596.81-596.83, 598.2, 612-612.1, 779.4-779.5, 780.62-780.66, 995.89, E870-E876.9, E878-E879.9, E930-E949.9, V44-V45, V45.2-V45.4, V45.7, V45.77, V45.79-V45.8, V45.87-V45.89 |
| 3     | C.2.7  | Animal contact                       | W52.0-W62.9, W64-W64.9, X20-X29.9                                                                                                                                                                                                                                                                                                                                                                                                                                                                                                                                                                                                                                                                                                                                                                                                               | E905-E906.99                                                                                                                                                                                                                                                                                                                                                                                                                                                                                              |
| 3     | C.2.8  | Foreign body                         | H02.81-H02.819, H44.6-H44.799, M60.2-M60.28, W44-W45, W45.3-W45.9, W75-W76.9, W78-W80.9, W83-W84.9                                                                                                                                                                                                                                                                                                                                                                                                                                                                                                                                                                                                                                                                                                                                              | 360.5-360.69, 374.86, 376.6, 709.4, 770.1-770.18, E911-E912.09, E913.8-E915.09                                                                                                                                                                                                                                                                                                                                                                                                                            |
| 3     | C.2.9  | Environmental heat and cold exposure | L55-L55.9, L58-L58.9, W88-W94.9, W97.9, W99-W99.9, X30-X32.9, X39-X39.9                                                                                                                                                                                                                                                                                                                                                                                                                                                                                                                                                                                                                                                                                                                                                                         | E900-E902.99, E926-E926.99, E929.5                                                                                                                                                                                                                                                                                                                                                                                                                                                                        |
| 3     | C.2.10 | Exposure to forces of nature         | X33-X38.9                                                                                                                                                                                                                                                                                                                                                                                                                                                                                                                                                                                                                                                                                                                                                                                                                                       | E907-E909.9                                                                                                                                                                                                                                                                                                                                                                                                                                                                                               |
| 3     | C.2.11 | Other unintentional injuries         | W39-W39.9, W77-W77.9, W81-W81.9, W85-W87.9, X50-X58.9                                                                                                                                                                                                                                                                                                                                                                                                                                                                                                                                                                                                                                                                                                                                                                                           | E903-E904.99, E913.2-E913.39, E923-E923.99, E927-E928.09, E928.8-E928.89                                                                                                                                                                                                                                                                                                                                                                                                                                  |
| 2     | C.3    | Self-harm and interpersonal violence | T74.2-U03, X60-X64.9, X66-Y08.9, Y35-Y38.9, Y87.0-Y87.2, Y89.0-Y89.1                                                                                                                                                                                                                                                                                                                                                                                                                                                                                                                                                                                                                                                                                                                                                                            | E950-E979.9, E990-E999.1                                                                                                                                                                                                                                                                                                                                                                                                                                                                                  |
| 3     | C.3.1  | Self-harm                            | X60-X64.9, X66-X84.9, Y87.0                                                                                                                                                                                                                                                                                                                                                                                                                                                                                                                                                                                                                                                                                                                                                                                                                     | E950-E959                                                                                                                                                                                                                                                                                                                                                                                                                                                                                                 |
| 3     | C.3.2  | Interpersonal violence               | T74.2-T76.22, X85-Y08.9, Y87.1-Y87.2                                                                                                                                                                                                                                                                                                                                                                                                                                                                                                                                                                                                                                                                                                                                                                                                            | E960-E969                                                                                                                                                                                                                                                                                                                                                                                                                                                                                                 |
| 3     | C.3.3  | Conflict and terrorism               | U00-U03, Y36-Y38.9, Y89.1                                                                                                                                                                                                                                                                                                                                                                                                                                                                                                                                                                                                                                                                                                                                                                                                                       | E979-E979.9, E990-E999.1                                                                                                                                                                                                                                                                                                                                                                                                                                                                                  |
| 3     | C.3.4  | Executions and police conflict       | Y35-Y35.93, Y89.0                                                                                                                                                                                                                                                                                                                                                                                                                                                                                                                                                                                                                                                                                                                                                                                                                               | E970-E978                                                                                                                                                                                                                                                                                                                                                                                                                                                                                                 |

Note: A, communicable, maternal, neonatal, and nutritional diseases; B, non-communicable diseases; C, injuries. A small number of causes don't use ICD codes.

**Table S2 | Cause-specific effects of mortality and disability (years) on changes in life expectancy (LE) and health-adjusted life expectancy (HALE) from 1990 to 2019.**

| Causes                                                            | Level  | $\Delta$ HALE    |                   | $\Delta$ LE  |              | $\Delta$ LED |
|-------------------------------------------------------------------|--------|------------------|-------------------|--------------|--------------|--------------|
|                                                                   |        | Mortality Effect | Disability Effect | Total Effect | Total Effect |              |
| <b>Communicable, maternal, neonatal, and nutritional diseases</b> | A      | 1.0925           | 0.2290            | 1.3216       | 3.4591       | 2.1376       |
| HIV/AIDS and sexually transmitted infections                      | A.1    | -0.0462          | -0.0029           | -0.0491      | -0.0319      | 0.0173       |
| HIV/AIDS                                                          | A.1.1  | -0.0484          | -0.0033           | -0.0517      | -0.0386      | 0.0131       |
| Sexually transmitted infections excluding HIV                     | A.1.2  | 0.0022           | 0.0004            | 0.0026       | 0.0068       | 0.0042       |
| Respiratory infections and tuberculosis                           | A.2    | 0.7790           | 0.0430            | 0.8219       | 1.8622       | 1.0403       |
| Tuberculosis                                                      | A.2.1  | 0.3600           | 0.0328            | 0.3927       | 0.3786       | -0.0141      |
| Lower respiratory infections                                      | A.2.2  | 0.3850           | 0.0033            | 0.3884       | 1.4458       | 1.0575       |
| Upper respiratory infections                                      | A.2.3  | 0.0336           | -0.0004           | 0.0331       | 0.0374       | 0.0042       |
| Otitis media                                                      | A.2.4  | 0.0004           | 0.0073            | 0.0077       | 0.0004       | -0.0073      |
| Enteric infections                                                | A.3    | 0.0719           | 0.0004            | 0.0723       | 0.2872       | 0.2148       |
| Diarrheal diseases                                                | A.3.1  | 0.0642           | 0.0004            | 0.0645       | 0.2813       | 0.2168       |
| Typhoid and paratyphoid                                           | A.3.2  | 0.0059           | 0.0001            | 0.0060       | 0.0035       | -0.0025      |
| Invasive Non-typhoidal Salmonella (iNTS)                          | A.3.3  | 0.0013           | 0.0000            | 0.0013       | 0.0012       | -0.0001      |
| Other intestinal infectious diseases                              | A.3.4  | 0.0004           | 0.0000            | 0.0004       | 0.0011       | 0.0006       |
| Neglected tropical diseases and malaria                           | A.4    | 0.0136           | 0.0994            | 0.1130       | 0.0143       | -0.0986      |
| Malaria                                                           | A.4.1  | 0.0046           | 0.0007            | 0.0053       | 0.0039       | -0.0014      |
| Chagas disease                                                    | A.4.2  | 0.0000           | 0.0000            | 0.0000       | 0.0000       | 0.0000       |
| Leishmaniasis                                                     | A.4.3  | 0.0000           | 0.0000            | 0.0000       | 0.0000       | 0.0000       |
| African trypanosomiasis                                           | A.4.4  | 0.0000           | 0.0000            | 0.0000       | 0.0000       | 0.0000       |
| Schistosomiasis                                                   | A.4.5  | 0.0047           | 0.0043            | 0.0091       | 0.0044       | -0.0047      |
| Cysticercosis                                                     | A.4.6  | 0.0002           | 0.0059            | 0.0061       | 0.0002       | -0.0060      |
| Cystic echinococcosis                                             | A.4.7  | 0.0001           | 0.0000            | 0.0001       | 0.0001       | 0.0000       |
| Lymphatic filariasis                                              | A.4.8  | 0.0000           | 0.0000            | 0.0000       | 0.0000       | 0.0000       |
| Onchocerciasis                                                    | A.4.9  | 0.0000           | 0.0000            | 0.0000       | 0.0000       | 0.0000       |
| Trachoma                                                          | A.4.10 | 0.0000           | 0.0032            | 0.0032       | 0.0000       | -0.0032      |
| Dengue                                                            | A.4.11 | 0.0001           | -0.0022           | -0.0021      | 0.0002       | 0.0023       |
| Yellow fever                                                      | A.4.12 | 0.0000           | 0.0000            | 0.0000       | 0.0000       | 0.0000       |
| Rabies                                                            | A.4.13 | 0.0021           | 0.0000            | 0.0021       | 0.0024       | 0.0003       |
| Intestinal nematode infections                                    | A.4.14 | 0.0007           | 0.0409            | 0.0416       | 0.0013       | -0.0403      |
| Food-borne trematodiasis                                          | A.4.15 | 0.0000           | 0.0380            | 0.0380       | 0.0000       | -0.0380      |
| Leprosy                                                           | A.4.16 | 0.0000           | 0.0000            | 0.0000       | 0.0000       | 0.0000       |
| Ebola                                                             | A.4.17 | 0.0000           | 0.0000            | 0.0000       | 0.0000       | 0.0000       |
| Zika virus                                                        | A.4.18 | 0.0000           | 0.0000            | 0.0000       | 0.0000       | 0.0000       |
| Guinea worm disease                                               | A.4.19 | 0.0000           | 0.0000            | 0.0000       | 0.0000       | 0.0000       |
| Other neglected tropical diseases                                 | A.4.20 | 0.0011           | 0.0084            | 0.0096       | 0.0019       | -0.0077      |
| Other infectious diseases                                         | A.5    | 0.1677           | 0.0183            | 0.1860       | 0.4507       | 0.2647       |
| Meningitis                                                        | A.5.1  | 0.0393           | 0.0050            | 0.0443       | 0.0993       | 0.0550       |
| Encephalitis                                                      | A.5.2  | 0.0068           | 0.0031            | 0.0099       | 0.0196       | 0.0097       |
| Diphtheria                                                        | A.5.3  | 0.0003           | 0.0000            | 0.0003       | 0.0006       | 0.0003       |
| Whooping cough                                                    | A.5.4  | 0.0167           | 0.0010            | 0.0177       | 0.0949       | 0.0773       |



| Causes                                  | Level    | $\Delta$ HALE    |                   |               | $\Delta$ LE   |                | $\Delta$ LED |
|-----------------------------------------|----------|------------------|-------------------|---------------|---------------|----------------|--------------|
|                                         |          | Mortality Effect | Disability Effect | Total Effect  | Total Effect  |                |              |
| Tetanus                                 | A.5.5    | 0.0132           | 0.0001            | 0.0133        | 0.0581        | 0.0448         |              |
| Measles                                 | A.5.6    | 0.0276           | 0.0007            | 0.0282        | 0.0912        | 0.0630         |              |
| Varicella and herpes zoster             | A.5.7    | 0.0064           | 0.0000            | 0.0064        | 0.0068        | 0.0004         |              |
| Acute hepatitis                         | A.5.8    | 0.0490           | 0.0013            | 0.0503        | 0.0621        | 0.0118         |              |
| Other unspecified infectious diseases   | A.5.9    | 0.0084           | 0.0072            | 0.0156        | 0.0181        | 0.0025         |              |
| Maternal and neonatal disorders         | A.6      | 0.0717           | -0.0916           | -0.0199       | 0.7633        | 0.7833         |              |
| Maternal disorders                      | A.6.1    | 0.0634           | 0.0039            | 0.0673        | 0.0355        | -0.0318        |              |
| Neonatal disorders                      | A.6.2    | 0.0083           | -0.0955           | -0.0872       | 0.7279        | 0.8151         |              |
| Nutritional deficiencies                | A.7      | 0.0348           | 0.1625            | 0.1973        | 0.1132        | -0.0842        |              |
| Protein-energy malnutrition             | A.7.1    | 0.0358           | -0.0135           | 0.0223        | 0.1105        | 0.0882         |              |
| Iodine deficiency                       | A.7.2    | 0.0000           | 0.0028            | 0.0028        | 0.0000        | -0.0028        |              |
| Vitamin A deficiency                    | A.7.3    | 0.0000           | 0.0035            | 0.0035        | 0.0000        | -0.0035        |              |
| Dietary iron deficiency                 | A.7.4    | 0.0000           | 0.1719            | 0.1719        | 0.0000        | -0.1719        |              |
| Other nutritional deficiencies          | A.7.5    | -0.0010          | -0.0022           | -0.0032       | 0.0026        | 0.0058         |              |
| <b>Non-communicable diseases</b>        | <b>B</b> | <b>6.0503</b>    | <b>0.2284</b>     | <b>6.2788</b> | <b>5.8257</b> | <b>-0.4530</b> |              |
| Neoplasms                               | B.1      | 0.7057           | -0.0425           | 0.6632        | 0.8299        | 0.1667         |              |
| Lip and oral cavity cancer              | B.1.1    | -0.0036          | -0.0005           | -0.0041       | -0.0036       | 0.0005         |              |
| Nasopharynx cancer                      | B.1.2    | 0.0340           | -0.0018           | 0.0323        | 0.0318        | -0.0005        |              |
| Other pharynx cancer                    | B.1.3    | 0.0018           | -0.0001           | 0.0017        | 0.0017        | 0.0000         |              |
| Esophageal cancer                       | B.1.4    | 0.1554           | 0.0016            | 0.1570        | 0.1679        | 0.0108         |              |
| Stomach cancer                          | B.1.5    | 0.2938           | 0.0001            | 0.2939        | 0.3065        | 0.0127         |              |
| Colon and rectum cancer                 | B.1.6    | -0.0652          | -0.0120           | -0.0772       | -0.0522       | 0.0250         |              |
| Liver cancer                            | B.1.7    | 0.3395           | 0.0034            | 0.3428        | 0.3445        | 0.0016         |              |
| Gallbladder and biliary tract cancer    | B.1.8    | -0.0031          | -0.0002           | -0.0033       | -0.0023       | 0.0009         |              |
| Pancreatic cancer                       | B.1.9    | -0.0472          | -0.0007           | -0.0479       | -0.0419       | 0.0059         |              |
| Larynx cancer                           | B.1.10   | 0.0074           | -0.0005           | 0.0069        | 0.0079        | 0.0010         |              |
| Tracheal, bronchus, and lung cancer     | B.1.11   | -0.1166          | -0.0045           | -0.1211       | -0.0717       | 0.0493         |              |
| Malignant skin melanoma                 | B.1.12   | 0.0012           | -0.0003           | 0.0009        | 0.0012        | 0.0003         |              |
| Non-melanoma skin cancer                | B.1.13   | -0.0030          | -0.0001           | -0.0032       | -0.0018       | 0.0014         |              |
| Breast cancer                           | B.1.14   | 0.0024           | -0.0071           | -0.0047       | 0.0036        | 0.0083         |              |
| Cervical cancer                         | B.1.15   | 0.0076           | -0.0008           | 0.0068        | 0.0065        | -0.0003        |              |
| Uterine cancer                          | B.1.16   | 0.0123           | -0.0005           | 0.0118        | 0.0123        | 0.0004         |              |
| Ovarian cancer                          | B.1.17   | -0.0087          | -0.0006           | -0.0093       | -0.0095       | -0.0002        |              |
| Prostate cancer                         | B.1.18   | 0.0007           | -0.0044           | -0.0037       | 0.0030        | 0.0067         |              |
| Testicular cancer                       | B.1.19   | 0.0002           | -0.0004           | -0.0002       | 0.0002        | 0.0004         |              |
| Kidney cancer                           | B.1.20   | -0.0116          | -0.0010           | -0.0126       | -0.0092       | 0.0034         |              |
| Bladder cancer                          | B.1.21   | 0.0064           | -0.0017           | 0.0047        | 0.0062        | 0.0015         |              |
| Brain and central nervous system cancer | B.1.22   | 0.0107           | -0.0008           | 0.0099        | 0.0165        | 0.0066         |              |
| Thyroid cancer                          | B.1.23   | 0.0010           | -0.0005           | 0.0005        | 0.0010        | 0.0006         |              |
| Mesothelioma                            | B.1.24   | -0.0002          | 0.0000            | -0.0002       | -0.0002       | 0.0000         |              |
| Hodgkin lymphoma                        | B.1.25   | 0.0096           | -0.0001           | 0.0095        | 0.0084        | -0.0011        |              |
| Non-Hodgkin lymphoma                    | B.1.26   | -0.0090          | -0.0029           | -0.0119       | -0.0073       | 0.0046         |              |
| Multiple myeloma                        | B.1.27   | -0.0012          | -0.0003           | -0.0014       | -0.0005       | 0.0010         |              |

| Causes                                              | Level  | $\Delta$ HALE    |                   |              | $\Delta$ LE  |         | $\Delta$ LED |
|-----------------------------------------------------|--------|------------------|-------------------|--------------|--------------|---------|--------------|
|                                                     |        | Mortality Effect | Disability Effect | Total Effect | Total Effect |         |              |
| Leukemia                                            | B.1.28 | 0.0692           | -0.0005           | 0.0688       | 0.0826       | 0.0139  |              |
| Other malignant neoplasms                           | B.1.29 | 0.0227           | -0.0039           | 0.0188       | 0.0289       | 0.0101  |              |
| Other neoplasms                                     | B.1.30 | -0.0010          | -0.0013           | -0.0024      | -0.0006      | 0.0018  |              |
| Cardiovascular diseases                             | B.2    | 1.8440           | -0.0776           | 1.7664       | 1.8217       | 0.0553  |              |
| Rheumatic heart disease                             | B.2.1  | 0.2780           | 0.0013            | 0.2792       | 0.2372       | -0.0420 |              |
| Ischemic heart disease                              | B.2.2  | -0.2965          | -0.0040           | -0.3004      | -0.0680      | 0.2324  |              |
| Stroke                                              | B.2.3  | 1.4604           | -0.0730           | 1.3875       | 1.3135       | -0.0740 |              |
| Hypertensive heart disease                          | B.2.4  | 0.3703           | 0.0040            | 0.3743       | 0.2936       | -0.0806 |              |
| Non-rheumatic valvular heart disease                | B.2.5  | 0.0050           | -0.0010           | 0.0039       | 0.0037       | -0.0003 |              |
| Cardiomyopathy and myocarditis                      | B.2.6  | 0.0018           | 0.0000            | 0.0018       | 0.0109       | 0.0091  |              |
| Atrial fibrillation and flutter                     | B.2.8  | 0.0035           | -0.0039           | -0.0004      | 0.0035       | 0.0040  |              |
| Aortic aneurysm                                     | B.2.9  | 0.0010           | 0.0000            | 0.0010       | 0.0012       | 0.0002  |              |
| Peripheral artery disease                           | B.2.10 | -0.0004          | 0.0016            | 0.0012       | -0.0002      | -0.0014 |              |
| Endocarditis                                        | B.2.11 | 0.0042           | 0.0000            | 0.0041       | 0.0066       | 0.0025  |              |
| Other cardiovascular and circulatory diseases       | B.2.12 | 0.0168           | -0.0025           | 0.0143       | 0.0197       | 0.0054  |              |
| Chronic respiratory diseases                        | B.3    | 2.7212           | 0.1112            | 2.8324       | 2.0179       | -0.8145 |              |
| Chronic obstructive pulmonary disease               | B.3.1  | 2.6142           | 0.0981            | 2.7123       | 1.9314       | -0.7809 |              |
| Pneumoconiosis                                      | B.3.2  | 0.0165           | 0.0022            | 0.0187       | 0.0154       | -0.0032 |              |
| Asthma                                              | B.3.3  | 0.0903           | 0.0137            | 0.1040       | 0.0694       | -0.0346 |              |
| Interstitial lung disease and pulmonary sarcoidosis | B.3.4  | 0.0003           | -0.0009           | -0.0006      | 0.0007       | 0.0013  |              |
| Other chronic respiratory diseases                  | B.3.5  | 0.0000           | -0.0019           | -0.0019      | 0.0010       | 0.0029  |              |
| Digestive diseases                                  | B.4    | 0.4969           | 0.0477            | 0.5446       | 0.4885       | -0.0561 |              |
| Cirrhosis and other chronic liver diseases          | B.4.1  | 0.2425           | 0.0030            | 0.2455       | 0.2345       | -0.0110 |              |
| Upper digestive system diseases                     | B.4.2  | 0.1254           | 0.0201            | 0.1455       | 0.1116       | -0.0339 |              |
| Appendicitis                                        | B.4.3  | 0.0098           | -0.0002           | 0.0096       | 0.0078       | -0.0018 |              |
| Paralytic ileus and intestinal obstruction          | B.4.4  | 0.0205           | -0.0002           | 0.0203       | 0.0423       | 0.0220  |              |
| Inguinal, femoral, and abdominal hernia             | B.4.5  | 0.0028           | 0.0017            | 0.0045       | 0.0062       | 0.0018  |              |
| Inflammatory bowel disease                          | B.4.6  | 0.0103           | -0.0032           | 0.0071       | 0.0091       | 0.0021  |              |
| Vascular intestinal disorders                       | B.4.7  | 0.0017           | 0.0000            | 0.0017       | 0.0015       | -0.0002 |              |
| Gallbladder and biliary diseases                    | B.4.8  | 0.0351           | 0.0252            | 0.0603       | 0.0292       | -0.0310 |              |
| Pancreatitis                                        | B.4.9  | 0.0117           | 0.0003            | 0.0119       | 0.0100       | -0.0020 |              |
| Other digestive diseases                            | B.4.10 | 0.0371           | 0.0012            | 0.0383       | 0.0363       | -0.0020 |              |
| Neurological disorders                              | B.5    | 0.0503           | -0.0786           | -0.0283      | 0.0514       | 0.0797  |              |
| Alzheimer's disease and other dementias             | B.5.1  | 0.0043           | -0.0403           | -0.0360      | 0.0043       | 0.0402  |              |
| Parkinson's disease                                 | B.5.2  | 0.0162           | -0.0073           | 0.0089       | 0.0143       | 0.0054  |              |
| Idiopathic epilepsy                                 | B.5.3  | 0.0288           | -0.0030           | 0.0258       | 0.0275       | 0.0018  |              |
| Multiple sclerosis                                  | B.5.4  | 0.0009           | -0.0001           | 0.0008       | 0.0009       | 0.0000  |              |
| Motor neuron disease                                | B.5.5  | 0.0010           | -0.0001           | 0.0009       | 0.0031       | 0.0022  |              |
| Headache disorders                                  | B.5.6  | 0.0000           | -0.0236           | -0.0236      | 0.0000       | 0.0236  |              |
| Other neurological disorders                        | B.5.7  | -0.0009          | -0.0042           | -0.0052      | 0.0014       | 0.0065  |              |
| Mental disorders                                    | B.6    | -0.0001          | 0.0354            | 0.0353       | -0.0001      | -0.0353 |              |
| Schizophrenia                                       | B.6.1  | 0.0000           | -0.0057           | -0.0057      | 0.0000       | 0.0057  |              |
| Depressive disorders                                | B.6.2  | 0.0000           | 0.0192            | 0.0192       | 0.0000       | -0.0192 |              |

| Causes                                           | Level  | $\Delta$ HALE    |                   |              | $\Delta$ LE  |         | $\Delta$ LED |
|--------------------------------------------------|--------|------------------|-------------------|--------------|--------------|---------|--------------|
|                                                  |        | Mortality Effect | Disability Effect | Total Effect | Total Effect |         |              |
| Bipolar disorder                                 | B.6.3  | 0.0000           | -0.0001           | -0.0001      | 0.0000       | 0.0001  |              |
| Anxiety disorders                                | B.6.4  | 0.0000           | 0.0249            | 0.0249       | 0.0000       | -0.0249 |              |
| Eating disorders                                 | B.6.5  | -0.0001          | -0.0065           | -0.0065      | -0.0001      | 0.0065  |              |
| Autism spectrum disorders                        | B.6.6  | 0.0000           | -0.0015           | -0.0015      | 0.0000       | 0.0015  |              |
| Attention-deficit/hyperactivity disorder         | B.6.7  | 0.0000           | -0.0010           | -0.0010      | 0.0000       | 0.0010  |              |
| Conduct disorder                                 | B.6.8  | 0.0000           | -0.0015           | -0.0015      | 0.0000       | 0.0015  |              |
| Idiopathic developmental intellectual disability | B.6.9  | 0.0000           | 0.0077            | 0.0077       | 0.0000       | -0.0077 |              |
| Other mental disorders                           | B.6.10 | 0.0000           | -0.0002           | -0.0002      | 0.0000       | 0.0002  |              |
| Substance use disorders                          | B.7    | 0.0599           | 0.0063            | 0.0662       | 0.0419       | -0.0244 |              |
| Alcohol use disorders                            | B.7.1  | -0.0032          | -0.0002           | -0.0034      | -0.0029      | 0.0005  |              |
| Drug use disorders                               | B.7.2  | 0.0631           | 0.0065            | 0.0696       | 0.0447       | -0.0249 |              |
| Diabetes and kidney diseases                     | B.8    | 0.0778           | -0.0578           | 0.0200       | 0.0890       | 0.0690  |              |
| Diabetes mellitus                                | B.8.1  | -0.0010          | -0.0517           | -0.0527      | 0.0135       | 0.0661  |              |
| Chronic kidney disease                           | B.8.2  | 0.0578           | -0.0062           | 0.0516       | 0.0570       | 0.0054  |              |
| Acute glomerulonephritis                         | B.8.3  | 0.0210           | 0.0000            | 0.0210       | 0.0185       | -0.0025 |              |
| Skin and subcutaneous diseases                   | B.9    | 0.0134           | -0.0084           | 0.0049       | 0.0113       | 0.0064  |              |
| Dermatitis                                       | B.9.1  | 0.0000           | -0.0012           | -0.0012      | 0.0000       | 0.0012  |              |
| Psoriasis                                        | B.9.2  | 0.0000           | 0.0106            | 0.0106       | 0.0000       | -0.0106 |              |
| Bacterial skin diseases                          | B.9.3  | 0.0145           | 0.0001            | 0.0146       | 0.0119       | -0.0027 |              |
| Scabies                                          | B.9.4  | 0.0000           | 0.0016            | 0.0016       | 0.0000       | -0.0016 |              |
| Fungal skin diseases                             | B.9.5  | 0.0000           | 0.0006            | 0.0006       | 0.0000       | -0.0006 |              |
| Viral skin diseases                              | B.9.6  | 0.0000           | -0.0002           | -0.0002      | 0.0000       | 0.0002  |              |
| Acne vulgaris                                    | B.9.7  | 0.0000           | -0.0141           | -0.0141      | 0.0000       | 0.0141  |              |
| Alopecia areata                                  | B.9.8  | 0.0000           | 0.0000            | 0.0000       | 0.0000       | 0.0000  |              |
| Pruritus                                         | B.9.9  | 0.0000           | -0.0010           | -0.0010      | 0.0000       | 0.0010  |              |
| Urticaria                                        | B.9.10 | 0.0000           | 0.0000            | 0.0000       | 0.0000       | 0.0000  |              |
| Decubitus ulcer                                  | B.9.11 | -0.0015          | -0.0003           | -0.0017      | -0.0008      | 0.0010  |              |
| Other skin and subcutaneous diseases             | B.9.12 | 0.0003           | -0.0045           | -0.0043      | 0.0002       | 0.0044  |              |
| Sense organ diseases                             | B.10   | 0.0000           | 0.0491            | 0.0491       | 0.0000       | -0.0491 |              |
| Blindness and vision loss                        | B.10.1 | 0.0000           | 0.0311            | 0.0311       | 0.0000       | -0.0311 |              |
| Age-related and other hearing loss               | B.10.2 | 0.0000           | 0.0199            | 0.0199       | 0.0000       | -0.0199 |              |
| Other sense organ diseases                       | B.10.3 | 0.0000           | -0.0018           | -0.0018      | 0.0000       | 0.0018  |              |
| Musculoskeletal disorders                        | B.11   | -0.0035          | 0.1084            | 0.1049       | -0.0014      | -0.1062 |              |
| Rheumatoid arthritis                             | B.11.1 | -0.0002          | -0.0015           | -0.0017      | 0.0005       | 0.0022  |              |
| Osteoarthritis                                   | B.11.2 | 0.0000           | -0.0215           | -0.0215      | 0.0000       | 0.0215  |              |
| Low back pain                                    | B.11.3 | 0.0000           | 0.2376            | 0.2376       | 0.0000       | -0.2376 |              |
| Neck pain                                        | B.11.4 | 0.0000           | -0.0093           | -0.0093      | 0.0000       | 0.0093  |              |
| Gout                                             | B.11.5 | 0.0000           | -0.0066           | -0.0066      | 0.0000       | 0.0066  |              |
| Other musculoskeletal disorders                  | B.11.6 | -0.0033          | -0.0905           | -0.0938      | -0.0019      | 0.0919  |              |
| Other non-communicable diseases                  | B.12   | 0.0846           | 0.1352            | 0.2199       | 0.4755       | 0.2556  |              |
| Congenital birth defects                         | B.12.1 | 0.0499           | 0.0078            | 0.0576       | 0.4223       | 0.3647  |              |
| Urinary diseases and male infertility            | B.12.2 | 0.0164           | 0.0053            | 0.0217       | 0.0140       | -0.0077 |              |
| Gynecological diseases                           | B.12.3 | -0.0004          | 0.0477            | 0.0473       | -0.0003      | -0.0476 |              |

| Causes                                            | Level    | $\Delta$ HALE    |                   |               | $\Delta$ LE   |               | $\Delta$ LED |
|---------------------------------------------------|----------|------------------|-------------------|---------------|---------------|---------------|--------------|
|                                                   |          | Mortality Effect | Disability Effect | Total Effect  | Total Effect  |               |              |
| Hemoglobinopathies and hemolytic anemias          | B.12.4   | 0.0151           | 0.0573            | 0.0724        | 0.0210        | -0.0514       |              |
| Endocrine, metabolic, blood, and immune disorders | B.12.5   | 0.0036           | 0.0087            | 0.0123        | 0.0100        | -0.0023       |              |
| Oral disorders                                    | B.12.6   | 0.0000           | 0.0085            | 0.0085        | 0.0000        | -0.0085       |              |
| <b>Injuries</b>                                   | <b>C</b> | <b>1.1618</b>    | <b>-0.0525</b>    | <b>1.1093</b> | <b>1.2036</b> | <b>0.0943</b> |              |
| Transport injuries                                | C.1      | 0.2112           | -0.0565           | 0.1547        | 0.2092        | 0.0545        |              |
| Road injuries                                     | C.1.1    | 0.1789           | -0.0603           | 0.1186        | 0.1811        | 0.0625        |              |
| Other transport injuries                          | C.1.2    | 0.0323           | 0.0038            | 0.0361        | 0.0281        | -0.0080       |              |
| Unintentional injuries                            | C.2      | 0.3668           | -0.0063           | 0.3605        | 0.5719        | 0.2114        |              |
| Falls                                             | C.2.1    | -0.0085          | -0.0131           | -0.0215       | 0.0208        | 0.0424        |              |
| Drowning                                          | C.2.2    | 0.2494           | 0.0011            | 0.2505        | 0.3204        | 0.0699        |              |
| Fire, heat, and hot substances                    | C.2.3    | 0.0248           | -0.0004           | 0.0244        | 0.0322        | 0.0077        |              |
| Poisonings                                        | C.2.4    | 0.0069           | 0.0000            | 0.0068        | 0.0195        | 0.0127        |              |
| Exposure to mechanical forces                     | C.2.5    | 0.0270           | -0.0097           | 0.0173        | 0.0276        | 0.0103        |              |
| Adverse effects of medical treatment              | C.2.6    | 0.0186           | 0.0000            | 0.0186        | 0.0276        | 0.0090        |              |
| Animal contact                                    | C.2.7    | 0.0171           | 0.0029            | 0.0200        | 0.0184        | -0.0016       |              |
| Foreign body                                      | C.2.8    | 0.0038           | 0.0098            | 0.0136        | 0.0740        | 0.0604        |              |
| Environmental heat and cold exposure              | C.2.9    | 0.0207           | 0.0021            | 0.0227        | 0.0225        | -0.0003       |              |
| Exposure to forces of nature                      | C.2.10   | 0.0036           | -0.0015           | 0.0021        | 0.0027        | 0.0006        |              |
| Other unintentional injuries                      | C.2.11   | 0.0036           | 0.0025            | 0.0060        | 0.0063        | 0.0003        |              |
| Self-harm and interpersonal violence              | C.3      | 0.5838           | 0.0104            | 0.5941        | 0.4225        | -0.1717       |              |
| Self-harm                                         | C.3.1    | 0.4787           | 0.0057            | 0.4844        | 0.3374        | -0.1470       |              |
| Interpersonal violence                            | C.3.2    | 0.0933           | 0.0047            | 0.0980        | 0.0778        | -0.0202       |              |
| Conflict and terrorism                            | C.3.3    | 0.0001           | 0.0000            | 0.0001        | 0.0001        | 0.0000        |              |
| Executions and police conflict                    | C.3.4    | 0.0117           | 0.0000            | 0.0117        | 0.0073        | -0.0044       |              |

**Table S3 | Cause-specific effects of mortality and disability (years) on changes in life expectancy (LE) and health-adjusted life expectancy (HALE) from 1990 to 1999.**

| Causes                                                            | Level  | $\Delta$ HALE    |                   |              | $\Delta$ LE  | $\Delta$ LED |
|-------------------------------------------------------------------|--------|------------------|-------------------|--------------|--------------|--------------|
|                                                                   |        | Mortality Effect | Disability Effect | Total Effect | Total Effect |              |
| <b>Communicable, maternal, neonatal, and nutritional diseases</b> | A      | 0.7619           | 0.1295            | 0.8914       | 1.2887       | 0.3973       |
| HIV/AIDS and sexually transmitted infections                      | A.1    | -0.0620          | -0.0005           | -0.0625      | -0.0077      | 0.0548       |
| HIV/AIDS                                                          | A.1.1  | -0.0652          | -0.0006           | -0.0659      | -0.0102      | 0.0556       |
| Sexually transmitted infections excluding HIV                     | A.1.2  | 0.0032           | 0.0002            | 0.0034       | 0.0025       | -0.0009      |
| Respiratory infections and tuberculosis                           | A.2    | 0.4303           | 0.0146            | 0.4448       | 0.7645       | 0.3197       |
| Tuberculosis                                                      | A.2.1  | 0.2843           | 0.0110            | 0.2953       | 0.1754       | -0.1198      |
| Lower respiratory infections                                      | A.2.2  | 0.1298           | 0.0012            | 0.1310       | 0.5754       | 0.4444       |
| Upper respiratory infections                                      | A.2.3  | 0.0154           | 0.0002            | 0.0156       | 0.0133       | -0.0023      |
| Otitis media                                                      | A.2.4  | 0.0008           | 0.0021            | 0.0029       | 0.0003       | -0.0026      |
| Enteric infections                                                | A.3    | 0.0758           | 0.0053            | 0.0810       | 0.1408       | 0.0598       |
| Diarrheal diseases                                                | A.3.1  | 0.0655           | 0.0052            | 0.0708       | 0.1382       | 0.0674       |
| Typhoid and paratyphoid                                           | A.3.2  | 0.0085           | 0.0000            | 0.0086       | 0.0017       | -0.0068      |
| Invasive Non-typhoidal Salmonella (iNTS)                          | A.3.3  | 0.0015           | 0.0000            | 0.0015       | 0.0005       | -0.0010      |
| Other intestinal infectious diseases                              | A.3.4  | 0.0002           | 0.0000            | 0.0002       | 0.0005       | 0.0002       |
| Neglected tropical diseases and malaria                           | A.4    | 0.0146           | 0.0485            | 0.0630       | 0.0070       | -0.0560      |
| Malaria                                                           | A.4.1  | 0.0036           | 0.0005            | 0.0041       | 0.0012       | -0.0029      |
| Chagas disease                                                    | A.4.2  | 0.0000           | 0.0000            | 0.0000       | 0.0000       | 0.0000       |
| Leishmaniasis                                                     | A.4.3  | 0.0000           | 0.0000            | 0.0000       | 0.0000       | 0.0000       |
| African trypanosomiasis                                           | A.4.4  | 0.0000           | 0.0000            | 0.0000       | 0.0000       | 0.0000       |
| Schistosomiasis                                                   | A.4.5  | 0.0041           | 0.0023            | 0.0065       | 0.0021       | -0.0044      |
| Cysticercosis                                                     | A.4.6  | 0.0002           | -0.0027           | -0.0025      | 0.0001       | 0.0026       |
| Cystic echinococcosis                                             | A.4.7  | 0.0002           | 0.0000            | 0.0002       | 0.0001       | -0.0001      |
| Lymphatic filariasis                                              | A.4.8  | 0.0000           | 0.0000            | 0.0000       | 0.0000       | 0.0000       |
| Onchocerciasis                                                    | A.4.9  | 0.0000           | 0.0000            | 0.0000       | 0.0000       | 0.0000       |
| Trachoma                                                          | A.4.10 | 0.0000           | 0.0009            | 0.0009       | 0.0000       | -0.0009      |
| Dengue                                                            | A.4.11 | 0.0002           | -0.0003           | -0.0001      | 0.0001       | 0.0002       |
| Yellow fever                                                      | A.4.12 | 0.0000           | 0.0000            | 0.0000       | 0.0000       | 0.0000       |
| Rabies                                                            | A.4.13 | 0.0038           | 0.0000            | 0.0038       | 0.0016       | -0.0023      |
| Intestinal nematode infections                                    | A.4.14 | 0.0007           | 0.0200            | 0.0207       | 0.0007       | -0.0200      |
| Food-borne trematodiasis                                          | A.4.15 | 0.0000           | 0.0242            | 0.0242       | 0.0000       | -0.0242      |
| Leprosy                                                           | A.4.16 | 0.0000           | 0.0000            | 0.0000       | 0.0000       | 0.0000       |
| Ebola                                                             | A.4.17 | 0.0000           | 0.0000            | 0.0000       | 0.0000       | 0.0000       |
| Zika virus                                                        | A.4.18 | 0.0000           | 0.0000            | 0.0000       | 0.0000       | 0.0000       |
| Guinea worm disease                                               | A.4.19 | 0.0000           | 0.0000            | 0.0000       | 0.0000       | 0.0000       |
| Other neglected tropical diseases                                 | A.4.20 | 0.0017           | 0.0035            | 0.0052       | 0.0011       | -0.0041      |
| Other infectious diseases                                         | A.5    | 0.1859           | 0.0072            | 0.1931       | 0.2368       | 0.0437       |
| Meningitis                                                        | A.5.1  | 0.0299           | 0.0020            | 0.0319       | 0.0460       | 0.0142       |
| Encephalitis                                                      | A.5.2  | 0.0035           | 0.0014            | 0.0049       | 0.0056       | 0.0007       |
| Diphtheria                                                        | A.5.3  | 0.0004           | 0.0000            | 0.0004       | 0.0004       | 0.0000       |

| Causes                                  | Level    | $\Delta$ HALE    |                   |               | $\Delta$ LE   |               | $\Delta$ LED |
|-----------------------------------------|----------|------------------|-------------------|---------------|---------------|---------------|--------------|
|                                         |          | Mortality Effect | Disability Effect | Total Effect  | Total Effect  |               |              |
| Whooping cough                          | A.5.4    | 0.0177           | 0.0004            | 0.0181        | 0.0533        | 0.0352        |              |
| Tetanus                                 | A.5.5    | 0.0209           | 0.0000            | 0.0210        | 0.0395        | 0.0186        |              |
| Measles                                 | A.5.6    | 0.0356           | 0.0003            | 0.0359        | 0.0531        | 0.0172        |              |
| Varicella and herpes zoster             | A.5.7    | 0.0058           | 0.0000            | 0.0058        | 0.0027        | -0.0031       |              |
| Acute hepatitis                         | A.5.8    | 0.0631           | 0.0001            | 0.0632        | 0.0312        | -0.0320       |              |
| Other unspecified infectious diseases   | A.5.9    | 0.0090           | 0.0030            | 0.0120        | 0.0052        | -0.0069       |              |
| Maternal and neonatal disorders         | A.6      | 0.0839           | -0.0143           | 0.0696        | 0.0891        | 0.0194        |              |
| Maternal disorders                      | A.6.1    | 0.0830           | 0.0027            | 0.0857        | 0.0111        | -0.0747       |              |
| Neonatal disorders                      | A.6.2    | 0.0009           | -0.0170           | -0.0161       | 0.0780        | 0.0941        |              |
| Nutritional deficiencies                | A.7      | 0.0334           | 0.0687            | 0.1021        | 0.0581        | -0.0440       |              |
| Protein-energy malnutrition             | A.7.1    | 0.0325           | -0.0036           | 0.0289        | 0.0571        | 0.0282        |              |
| Iodine deficiency                       | A.7.2    | 0.0000           | 0.0019            | 0.0019        | 0.0000        | -0.0019       |              |
| Vitamin A deficiency                    | A.7.3    | 0.0000           | 0.0020            | 0.0020        | 0.0000        | -0.0020       |              |
| Dietary iron deficiency                 | A.7.4    | 0.0000           | 0.0665            | 0.0665        | 0.0000        | -0.0665       |              |
| Other nutritional deficiencies          | A.7.5    | 0.0009           | 0.0020            | 0.0029        | 0.0011        | -0.0018       |              |
| <b>Non-communicable diseases</b>        | <b>B</b> | <b>1.4347</b>    | <b>0.1446</b>     | <b>1.5793</b> | <b>1.5873</b> | <b>0.0081</b> |              |
| Neoplasms                               | B.1      | -0.1800          | -0.0048           | -0.1848       | 0.1231        | 0.3079        |              |
| Lip and oral cavity cancer              | B.1.1    | 0.0004           | 0.0000            | 0.0004        | 0.0010        | 0.0007        |              |
| Nasopharynx cancer                      | B.1.2    | 0.0141           | -0.0001           | 0.0140        | 0.0091        | -0.0049       |              |
| Other pharynx cancer                    | B.1.3    | 0.0009           | 0.0000            | 0.0009        | 0.0007        | -0.0002       |              |
| Esophageal cancer                       | B.1.4    | 0.0032           | 0.0000            | 0.0031        | 0.0139        | 0.0107        |              |
| Stomach cancer                          | B.1.5    | 0.0570           | 0.0006            | 0.0576        | 0.0816        | 0.0240        |              |
| Colon and rectum cancer                 | B.1.6    | -0.0263          | -0.0010           | -0.0273       | -0.0023       | 0.0251        |              |
| Liver cancer                            | B.1.7    | -0.0121          | 0.0001            | -0.0120       | 0.0102        | 0.0221        |              |
| Gallbladder and biliary tract cancer    | B.1.8    | 0.0026           | 0.0000            | 0.0026        | 0.0020        | -0.0006       |              |
| Pancreatic cancer                       | B.1.9    | -0.0135          | -0.0001           | -0.0136       | -0.0062       | 0.0074        |              |
| Larynx cancer                           | B.1.10   | 0.0037           | 0.0000            | 0.0038        | 0.0031        | -0.0006       |              |
| Tracheal, bronchus, and lung cancer     | B.1.11   | -0.0773          | -0.0009           | -0.0782       | -0.0264       | 0.0518        |              |
| Malignant skin melanoma                 | B.1.12   | -0.0004          | 0.0000            | -0.0004       | 0.0004        | 0.0008        |              |
| Non-melanoma skin cancer                | B.1.13   | -0.0012          | 0.0000            | -0.0013       | 0.0003        | 0.0015        |              |
| Breast cancer                           | B.1.14   | -0.0379          | -0.0009           | -0.0388       | 0.0012        | 0.0400        |              |
| Cervical cancer                         | B.1.15   | -0.0162          | 0.0000            | -0.0162       | 0.0082        | 0.0244        |              |
| Uterine cancer                          | B.1.16   | -0.0053          | -0.0002           | -0.0055       | 0.0017        | 0.0073        |              |
| Ovarian cancer                          | B.1.17   | -0.0093          | -0.0001           | -0.0095       | -0.0024       | 0.0071        |              |
| Prostate cancer                         | B.1.18   | -0.0017          | -0.0007           | -0.0024       | -0.0005       | 0.0019        |              |
| Testicular cancer                       | B.1.19   | -0.0005          | -0.0001           | -0.0005       | 0.0000        | 0.0005        |              |
| Kidney cancer                           | B.1.20   | -0.0007          | -0.0001           | -0.0008       | -0.0004       | 0.0003        |              |
| Bladder cancer                          | B.1.21   | 0.0031           | -0.0002           | 0.0029        | 0.0019        | -0.0010       |              |
| Brain and central nervous system cancer | B.1.22   | -0.0189          | -0.0001           | -0.0190       | -0.0005       | 0.0185        |              |
| Thyroid cancer                          | B.1.23   | -0.0013          | -0.0001           | -0.0014       | 0.0006        | 0.0019        |              |
| Mesothelioma                            | B.1.24   | 0.0002           | 0.0000            | 0.0002        | 0.0003        | 0.0001        |              |
| Hodgkin lymphoma                        | B.1.25   | 0.0088           | 0.0000            | 0.0088        | 0.0031        | -0.0057       |              |

| Causes                                              | Level  | $\Delta$ HALE    |                   |              | $\Delta$ LE  |         | $\Delta$ LED |
|-----------------------------------------------------|--------|------------------|-------------------|--------------|--------------|---------|--------------|
|                                                     |        | Mortality Effect | Disability Effect | Total Effect | Total Effect |         |              |
| Non-Hodgkin lymphoma                                | B.1.26 | -0.0133          | -0.0003           | -0.0135      | 0.0000       | 0.0135  |              |
| Multiple myeloma                                    | B.1.27 | -0.0056          | 0.0000            | -0.0057      | 0.0000       | 0.0057  |              |
| Leukemia                                            | B.1.28 | -0.0234          | 0.0001            | -0.0233      | 0.0156       | 0.0390  |              |
| Other malignant neoplasms                           | B.1.29 | -0.0080          | -0.0005           | -0.0085      | 0.0072       | 0.0157  |              |
| Other neoplasms                                     | B.1.30 | -0.0010          | 0.0000            | -0.0010      | -0.0002      | 0.0008  |              |
| Cardiovascular diseases                             | B.2    | 0.6131           | -0.0112           | 0.6019       | 0.6348       | 0.0329  |              |
| Rheumatic heart disease                             | B.2.1  | 0.1844           | 0.0019            | 0.1864       | 0.1018       | -0.0846 |              |
| Ischemic heart disease                              | B.2.2  | 0.0206           | -0.0036           | 0.0170       | 0.1038       | 0.0868  |              |
| Stroke                                              | B.2.3  | 0.1553           | -0.0128           | 0.1426       | 0.2647       | 0.1222  |              |
| Hypertensive heart disease                          | B.2.4  | 0.2587           | 0.0013            | 0.2600       | 0.1525       | -0.1076 |              |
| Non-rheumatic valvular heart disease                | B.2.5  | 0.0008           | -0.0001           | 0.0008       | 0.0008       | 0.0000  |              |
| Cardiomyopathy and myocarditis                      | B.2.6  | -0.0081          | 0.0000            | -0.0081      | 0.0013       | 0.0094  |              |
| Atrial fibrillation and flutter                     | B.2.8  | 0.0003           | 0.0026            | 0.0029       | 0.0015       | -0.0015 |              |
| Aortic aneurysm                                     | B.2.9  | 0.0002           | 0.0000            | 0.0002       | 0.0006       | 0.0004  |              |
| Peripheral artery disease                           | B.2.10 | -0.0002          | -0.0001           | -0.0003      | 0.0000       | 0.0002  |              |
| Endocarditis                                        | B.2.11 | -0.0047          | 0.0000            | -0.0047      | 0.0001       | 0.0048  |              |
| Other cardiovascular and circulatory diseases       | B.2.12 | 0.0056           | -0.0005           | 0.0051       | 0.0077       | 0.0026  |              |
| Chronic respiratory diseases                        | B.3    | 0.8253           | -0.0039           | 0.8214       | 0.5520       | -0.2694 |              |
| Chronic obstructive pulmonary disease               | B.3.1  | 0.7761           | -0.0066           | 0.7695       | 0.5228       | -0.2466 |              |
| Pneumoconiosis                                      | B.3.2  | 0.0097           | -0.0037           | 0.0059       | 0.0061       | 0.0002  |              |
| Asthma                                              | B.3.3  | 0.0409           | 0.0075            | 0.0484       | 0.0222       | -0.0262 |              |
| Interstitial lung disease and pulmonary sarcoidosis | B.3.4  | 0.0008           | 0.0003            | 0.0011       | 0.0007       | -0.0004 |              |
| Other chronic respiratory diseases                  | B.3.5  | -0.0022          | -0.0014           | -0.0035      | 0.0001       | 0.0037  |              |
| Digestive diseases                                  | B.4    | 0.3044           | 0.0220            | 0.3264       | 0.1755       | -0.1509 |              |
| Cirrhosis and other chronic liver diseases          | B.4.1  | 0.1444           | 0.0011            | 0.1455       | 0.0767       | -0.0688 |              |
| Upper digestive system diseases                     | B.4.2  | 0.0858           | 0.0087            | 0.0944       | 0.0466       | -0.0478 |              |
| Appendicitis                                        | B.4.3  | 0.0070           | 0.0001            | 0.0070       | 0.0029       | -0.0042 |              |
| Paralytic ileus and intestinal obstruction          | B.4.4  | 0.0147           | -0.0002           | 0.0145       | 0.0149       | 0.0004  |              |
| Inguinal, femoral, and abdominal hernia             | B.4.5  | 0.0014           | 0.0009            | 0.0023       | 0.0022       | 0.0000  |              |
| Inflammatory bowel disease                          | B.4.6  | 0.0026           | -0.0014           | 0.0012       | 0.0022       | 0.0010  |              |
| Vascular intestinal disorders                       | B.4.7  | 0.0006           | 0.0000            | 0.0006       | 0.0006       | -0.0001 |              |
| Gallbladder and biliary diseases                    | B.4.8  | 0.0147           | 0.0121            | 0.0268       | 0.0100       | -0.0168 |              |
| Pancreatitis                                        | B.4.9  | 0.0086           | 0.0002            | 0.0088       | 0.0037       | -0.0051 |              |
| Other digestive diseases                            | B.4.10 | 0.0247           | 0.0005            | 0.0251       | 0.0156       | -0.0096 |              |
| Neurological disorders                              | B.5    | 0.0108           | -0.0350           | -0.0243      | 0.0157       | 0.0399  |              |
| Alzheimer's disease and other dementias             | B.5.1  | 0.0126           | -0.0165           | -0.0038      | 0.0057       | 0.0096  |              |
| Parkinson's disease                                 | B.5.2  | 0.0023           | -0.0057           | -0.0035      | 0.0038       | 0.0073  |              |
| Idiopathic epilepsy                                 | B.5.3  | 0.0016           | -0.0147           | -0.0131      | 0.0059       | 0.0189  |              |
| Multiple sclerosis                                  | B.5.4  | -0.0020          | 0.0000            | -0.0020      | 0.0000       | 0.0020  |              |
| Motor neuron disease                                | B.5.5  | -0.0016          | 0.0000            | -0.0016      | 0.0000       | 0.0015  |              |
| Headache disorders                                  | B.5.6  | 0.0000           | 0.0044            | 0.0044       | 0.0000       | -0.0044 |              |
| Other neurological disorders                        | B.5.7  | -0.0022          | -0.0025           | -0.0047      | 0.0003       | 0.0050  |              |

| Causes                                           | Level  | $\Delta$ HALE    |                   | $\Delta$ LE  |              | $\Delta$ LED |
|--------------------------------------------------|--------|------------------|-------------------|--------------|--------------|--------------|
|                                                  |        | Mortality Effect | Disability Effect | Total Effect | Total Effect |              |
| Mental disorders                                 | B.6    | -0.0001          | -0.0096           | -0.0098      | 0.0000       | 0.0098       |
| Schizophrenia                                    | B.6.1  | 0.0000           | -0.0007           | -0.0007      | 0.0000       | 0.0007       |
| Depressive disorders                             | B.6.2  | 0.0000           | 0.0014            | 0.0014       | 0.0000       | -0.0014      |
| Bipolar disorder                                 | B.6.3  | 0.0000           | -0.0001           | -0.0001      | 0.0000       | 0.0001       |
| Anxiety disorders                                | B.6.4  | 0.0000           | -0.0086           | -0.0086      | 0.0000       | 0.0086       |
| Eating disorders                                 | B.6.5  | -0.0001          | -0.0007           | -0.0008      | 0.0000       | 0.0008       |
| Autism spectrum disorders                        | B.6.6  | 0.0000           | -0.0007           | -0.0007      | 0.0000       | 0.0007       |
| Attention-deficit/hyperactivity disorder         | B.6.7  | 0.0000           | -0.0013           | -0.0013      | 0.0000       | 0.0013       |
| Conduct disorder                                 | B.6.8  | 0.0000           | -0.0001           | -0.0001      | 0.0000       | 0.0001       |
| Idiopathic developmental intellectual disability | B.6.9  | 0.0000           | 0.0015            | 0.0015       | 0.0000       | -0.0015      |
| Other mental disorders                           | B.6.10 | 0.0000           | -0.0003           | -0.0003      | 0.0000       | 0.0003       |
| Substance use disorders                          | B.7    | -0.1063          | 0.0079            | -0.0983      | -0.0055      | 0.0928       |
| Alcohol use disorders                            | B.7.1  | -0.0015          | -0.0008           | -0.0023      | 0.0005       | 0.0028       |
| Drug use disorders                               | B.7.2  | -0.1048          | 0.0087            | -0.0960      | -0.0060      | 0.0900       |
| Diabetes and kidney diseases                     | B.8    | -0.0165          | -0.0074           | -0.0239      | 0.0259       | 0.0498       |
| Diabetes mellitus                                | B.8.1  | -0.0318          | -0.0157           | -0.0475      | -0.0026      | 0.0449       |
| Chronic kidney disease                           | B.8.2  | -0.0109          | 0.0083            | -0.0026      | 0.0190       | 0.0216       |
| Acute glomerulonephritis                         | B.8.3  | 0.0262           | 0.0000            | 0.0261       | 0.0095       | -0.0166      |
| Skin and subcutaneous diseases                   | B.9    | 0.0045           | -0.0017           | 0.0028       | 0.0030       | 0.0002       |
| Dermatitis                                       | B.9.1  | 0.0000           | 0.0003            | 0.0003       | 0.0000       | -0.0003      |
| Psoriasis                                        | B.9.2  | 0.0000           | 0.0030            | 0.0030       | 0.0000       | -0.0030      |
| Bacterial skin diseases                          | B.9.3  | 0.0098           | 0.0000            | 0.0098       | 0.0046       | -0.0052      |
| Scabies                                          | B.9.4  | 0.0000           | 0.0006            | 0.0006       | 0.0000       | -0.0006      |
| Fungal skin diseases                             | B.9.5  | 0.0000           | 0.0001            | 0.0001       | 0.0000       | -0.0001      |
| Viral skin diseases                              | B.9.6  | 0.0000           | -0.0001           | -0.0001      | 0.0000       | 0.0001       |
| Acne vulgaris                                    | B.9.7  | 0.0000           | -0.0042           | -0.0042      | 0.0000       | 0.0042       |
| Alopecia areata                                  | B.9.8  | 0.0000           | 0.0000            | 0.0000       | 0.0000       | 0.0000       |
| Pruritus                                         | B.9.9  | 0.0000           | -0.0002           | -0.0002      | 0.0000       | 0.0002       |
| Urticaria                                        | B.9.10 | 0.0000           | 0.0000            | 0.0000       | 0.0000       | 0.0000       |
| Decubitus ulcer                                  | B.9.11 | -0.0025          | -0.0001           | -0.0026      | -0.0007      | 0.0019       |
| Other skin and subcutaneous diseases             | B.9.12 | -0.0028          | -0.0011           | -0.0038      | -0.0009      | 0.0029       |
| Sense organ diseases                             | B.10   | 0.0000           | -0.0270           | -0.0270      | 0.0000       | 0.0270       |
| Blindness and vision loss                        | B.10.1 | 0.0000           | -0.0243           | -0.0243      | 0.0000       | 0.0243       |
| Age-related and other hearing loss               | B.10.2 | 0.0000           | -0.0021           | -0.0021      | 0.0000       | 0.0021       |
| Other sense organ diseases                       | B.10.3 | 0.0000           | -0.0006           | -0.0006      | 0.0000       | 0.0006       |
| Musculoskeletal disorders                        | B.11   | -0.0179          | 0.1421            | 0.1242       | -0.0012      | -0.1254      |
| Rheumatoid arthritis                             | B.11.1 | 0.0007           | -0.0008           | -0.0001      | 0.0008       | 0.0010       |
| Osteoarthritis                                   | B.11.2 | 0.0000           | -0.0003           | -0.0003      | 0.0000       | 0.0003       |
| Low back pain                                    | B.11.3 | 0.0000           | 0.1752            | 0.1752       | 0.0000       | -0.1752      |
| Neck pain                                        | B.11.4 | 0.0000           | -0.0030           | -0.0030      | 0.0000       | 0.0030       |
| Gout                                             | B.11.5 | 0.0000           | 0.0009            | 0.0009       | 0.0000       | -0.0009      |
| Other musculoskeletal disorders                  | B.11.6 | -0.0186          | -0.0299           | -0.0485      | -0.0020      | 0.0465       |



| Causes                                            | Level  | $\Delta$ HALE    |                   |              | $\Delta$ LE  |         | $\Delta$ LED |
|---------------------------------------------------|--------|------------------|-------------------|--------------|--------------|---------|--------------|
|                                                   |        | Mortality Effect | Disability Effect | Total Effect | Total Effect |         |              |
| Other non-communicable diseases                   | B.12   | -0.0026          | 0.0733            | 0.0706       | 0.0642       | -0.0065 |              |
| Congenital birth defects                          | B.12.1 | -0.0078          | 0.0017            | -0.0060      | 0.0516       | 0.0576  |              |
| Urinary diseases and male infertility             | B.12.2 | -0.0003          | 0.0038            | 0.0036       | 0.0033       | -0.0002 |              |
| Gynecological diseases                            | B.12.3 | 0.0000           | 0.0004            | 0.0004       | 0.0001       | -0.0003 |              |
| Hemoglobinopathies and hemolytic anemias          | B.12.4 | 0.0063           | 0.0223            | 0.0286       | 0.0061       | -0.0225 |              |
| Endocrine, metabolic, blood, and immune disorders | B.12.5 | -0.0009          | 0.0045            | 0.0035       | 0.0034       | -0.0002 |              |
| Oral disorders                                    | B.12.6 | 0.0000           | 0.0406            | 0.0406       | 0.0000       | -0.0406 |              |
| <b>Injuries</b>                                   | C      | 0.3761           | 0.0064            | 0.3825       | 0.3204       | -0.0621 |              |
| Transport injuries                                | C.1    | -0.3562          | -0.0033           | -0.3595      | 0.0076       | 0.3671  |              |
| Road injuries                                     | C.1.1  | -0.3736          | -0.0054           | -0.3790      | 0.0006       | 0.3796  |              |
| Other transport injuries                          | C.1.2  | 0.0175           | 0.0020            | 0.0195       | 0.0070       | -0.0125 |              |
| Unintentional injuries                            | C.2    | 0.2916           | 0.0067            | 0.2983       | 0.1893       | -0.1091 |              |
| Falls                                             | C.2.1  | 0.0540           | -0.0013           | 0.0527       | 0.0192       | -0.0335 |              |
| Drowning                                          | C.2.2  | 0.1073           | 0.0003            | 0.1076       | 0.0971       | -0.0105 |              |
| Fire, heat, and hot substances                    | C.2.3  | 0.0241           | 0.0024            | 0.0265       | 0.0138       | -0.0127 |              |
| Poisonings                                        | C.2.4  | -0.0037          | 0.0003            | -0.0034      | 0.0054       | 0.0088  |              |
| Exposure to mechanical forces                     | C.2.5  | 0.0511           | -0.0002           | 0.0509       | 0.0015       | -0.0494 |              |
| Adverse effects of medical treatment              | C.2.6  | 0.0123           | 0.0001            | 0.0123       | 0.0099       | -0.0024 |              |
| Animal contact                                    | C.2.7  | 0.0146           | 0.0013            | 0.0159       | 0.0063       | -0.0096 |              |
| Foreign body                                      | C.2.8  | -0.0052          | 0.0022            | -0.0031      | 0.0225       | 0.0255  |              |
| Environmental heat and cold exposure              | C.2.9  | 0.0250           | 0.0014            | 0.0263       | 0.0098       | -0.0165 |              |
| Exposure to forces of nature                      | C.2.10 | -0.0026          | -0.0004           | -0.0030      | -0.0004      | 0.0026  |              |
| Other unintentional injuries                      | C.2.11 | 0.0148           | 0.0007            | 0.0156       | 0.0043       | -0.0113 |              |
| Self-harm and interpersonal violence              | C.3    | 0.4407           | 0.0030            | 0.4437       | 0.1235       | -0.3202 |              |
| Self-harm                                         | C.3.1  | 0.3162           | 0.0019            | 0.3182       | 0.1004       | -0.2177 |              |
| Interpersonal violence                            | C.3.2  | 0.1014           | 0.0011            | 0.1025       | 0.0211       | -0.0814 |              |
| Conflict and terrorism                            | C.3.3  | -0.0042          | 0.0000            | -0.0042      | -0.0006      | 0.0037  |              |
| Executions and police conflict                    | C.3.4  | 0.0273           | 0.0000            | 0.0273       | 0.0026       | -0.0247 |              |

**Table S4 | Cause-specific effects of mortality and disability (years) on changes in life expectancy (LE) and health-adjusted life expectancy (HALE) from 2000 to 2009.**

| Causes                                                            | Level  | $\Delta$ HALE    |                   |              | $\Delta$ LE  | $\Delta$ LED |
|-------------------------------------------------------------------|--------|------------------|-------------------|--------------|--------------|--------------|
|                                                                   |        | Mortality Effect | Disability Effect | Total Effect | Total Effect |              |
| <b>Communicable, maternal, neonatal, and nutritional diseases</b> | A      | 0.4342           | 0.0821            | 0.5163       | 1.2765       | 0.7603       |
| HIV/AIDS and sexually transmitted infections                      | A.1    | -0.0109          | -0.0011           | -0.0121      | -0.0094      | 0.0026       |
| HIV/AIDS                                                          | A.1.1  | -0.0112          | -0.0017           | -0.0129      | -0.0087      | 0.0042       |
| Sexually transmitted infections excluding HIV                     | A.1.2  | 0.0003           | 0.0005            | 0.0008       | -0.0007      | -0.0015      |
| Respiratory infections and tuberculosis                           | A.2    | 0.3312           | 0.0150            | 0.3462       | 0.6761       | 0.3298       |
| Tuberculosis                                                      | A.2.1  | 0.1367           | 0.0110            | 0.1476       | 0.1202       | -0.0274      |
| Lower respiratory infections                                      | A.2.2  | 0.1766           | 0.0013            | 0.1779       | 0.5388       | 0.3609       |
| Upper respiratory infections                                      | A.2.3  | 0.0179           | -0.0002           | 0.0177       | 0.0170       | -0.0007      |
| Otitis media                                                      | A.2.4  | 0.0000           | 0.0029            | 0.0030       | 0.0000       | -0.0029      |
| Enteric infections                                                | A.3    | 0.0219           | 0.0024            | 0.0243       | 0.0985       | 0.0742       |
| Diarrheal diseases                                                | A.3.1  | 0.0201           | 0.0024            | 0.0225       | 0.0969       | 0.0744       |
| Typhoid and paratyphoid                                           | A.3.2  | 0.0012           | 0.0000            | 0.0012       | 0.0008       | -0.0004      |
| Invasive Non-typhoidal Salmonella (iNTS)                          | A.3.3  | 0.0004           | 0.0000            | 0.0004       | 0.0004       | 0.0000       |
| Other intestinal infectious diseases                              | A.3.4  | 0.0002           | 0.0000            | 0.0002       | 0.0004       | 0.0002       |
| Neglected tropical diseases and malaria                           | A.4    | -0.0008          | 0.0363            | 0.0355       | 0.0000       | -0.0355      |
| Malaria                                                           | A.4.1  | 0.0003           | 0.0001            | 0.0004       | 0.0003       | -0.0001      |
| Chagas disease                                                    | A.4.2  | 0.0000           | 0.0000            | 0.0000       | 0.0000       | 0.0000       |
| Leishmaniasis                                                     | A.4.3  | 0.0000           | 0.0000            | 0.0000       | 0.0000       | 0.0000       |
| African trypanosomiasis                                           | A.4.4  | 0.0000           | 0.0000            | 0.0000       | 0.0000       | 0.0000       |
| Schistosomiasis                                                   | A.4.5  | 0.0018           | 0.0011            | 0.0029       | 0.0014       | -0.0016      |
| Cysticercosis                                                     | A.4.6  | 0.0001           | 0.0046            | 0.0047       | 0.0001       | -0.0046      |
| Cystic echinococcosis                                             | A.4.7  | 0.0001           | 0.0000            | 0.0001       | 0.0000       | 0.0000       |
| Lymphatic filariasis                                              | A.4.8  | 0.0000           | 0.0000            | 0.0000       | 0.0000       | 0.0000       |
| Onchocerciasis                                                    | A.4.9  | 0.0000           | 0.0000            | 0.0000       | 0.0000       | 0.0000       |
| Trachoma                                                          | A.4.10 | 0.0000           | 0.0018            | 0.0018       | 0.0000       | -0.0018      |
| Dengue                                                            | A.4.11 | 0.0000           | -0.0010           | -0.0009      | 0.0000       | 0.0010       |
| Yellow fever                                                      | A.4.12 | 0.0000           | 0.0000            | 0.0000       | 0.0000       | 0.0000       |
| Rabies                                                            | A.4.13 | -0.0034          | 0.0000            | -0.0034      | -0.0025      | 0.0009       |
| Intestinal nematode infections                                    | A.4.14 | 0.0002           | 0.0167            | 0.0170       | 0.0003       | -0.0166      |
| Food-borne trematodiasis                                          | A.4.15 | 0.0000           | 0.0096            | 0.0096       | 0.0000       | -0.0096      |
| Leprosy                                                           | A.4.16 | 0.0000           | 0.0000            | 0.0000       | 0.0000       | 0.0000       |
| Ebola                                                             | A.4.17 | 0.0000           | 0.0000            | 0.0000       | 0.0000       | 0.0000       |
| Zika virus                                                        | A.4.18 | 0.0000           | 0.0000            | 0.0000       | 0.0000       | 0.0000       |
| Guinea worm disease                                               | A.4.19 | 0.0000           | 0.0000            | 0.0000       | 0.0000       | 0.0000       |
| Other neglected tropical diseases                                 | A.4.20 | 0.0001           | 0.0033            | 0.0034       | 0.0004       | -0.0031      |
| Other infectious diseases                                         | A.5    | 0.0552           | 0.0067            | 0.0619       | 0.1142       | 0.0523       |
| Meningitis                                                        | A.5.1  | 0.0152           | 0.0021            | 0.0172       | 0.0289       | 0.0117       |
| Encephalitis                                                      | A.5.2  | 0.0020           | 0.0008            | 0.0028       | 0.0054       | 0.0026       |
| Diphtheria                                                        | A.5.3  | 0.0000           | 0.0000            | 0.0000       | 0.0001       | 0.0001       |

| Causes                                  | Level    | $\Delta$ HALE    |                   |               | $\Delta$ LE   |                | $\Delta$ LED |
|-----------------------------------------|----------|------------------|-------------------|---------------|---------------|----------------|--------------|
|                                         |          | Mortality Effect | Disability Effect | Total Effect  | Total Effect  |                |              |
| Whooping cough                          | A.5.4    | 0.0035           | 0.0001            | 0.0036        | 0.0172        | 0.0136         |              |
| Tetanus                                 | A.5.5    | 0.0033           | 0.0000            | 0.0033        | 0.0111        | 0.0078         |              |
| Measles                                 | A.5.6    | 0.0061           | 0.0003            | 0.0064        | 0.0196        | 0.0132         |              |
| Varicella and herpes zoster             | A.5.7    | 0.0025           | 0.0000            | 0.0025        | 0.0027        | 0.0002         |              |
| Acute hepatitis                         | A.5.8    | 0.0187           | 0.0005            | 0.0191        | 0.0196        | 0.0005         |              |
| Other unspecified infectious diseases   | A.5.9    | 0.0040           | 0.0029            | 0.0069        | 0.0096        | 0.0027         |              |
| Maternal and neonatal disorders         | A.6      | 0.0273           | -0.0359           | -0.0087       | 0.3613        | 0.3700         |              |
| Maternal disorders                      | A.6.1    | 0.0233           | 0.0007            | 0.0241        | 0.0158        | -0.0082        |              |
| Neonatal disorders                      | A.6.2    | 0.0040           | -0.0367           | -0.0327       | 0.3455        | 0.3782         |              |
| Nutritional deficiencies                | A.7      | 0.0102           | 0.0588            | 0.0690        | 0.0359        | -0.0331        |              |
| Protein-energy malnutrition             | A.7.1    | 0.0118           | -0.0046           | 0.0073        | 0.0357        | 0.0284         |              |
| Iodine deficiency                       | A.7.2    | 0.0000           | -0.0020           | -0.0020       | 0.0000        | 0.0020         |              |
| Vitamin A deficiency                    | A.7.3    | 0.0000           | 0.0012            | 0.0012        | 0.0000        | -0.0012        |              |
| Dietary iron deficiency                 | A.7.4    | 0.0000           | 0.0683            | 0.0683        | 0.0000        | -0.0683        |              |
| Other nutritional deficiencies          | A.7.5    | -0.0016          | -0.0041           | -0.0057       | 0.0002        | 0.0059         |              |
| <b>Non-communicable diseases</b>        | <b>B</b> | <b>2.2806</b>    | <b>0.0502</b>     | <b>2.3307</b> | <b>2.0617</b> | <b>-0.2690</b> |              |
| Neoplasms                               | B.1      | 0.3577           | -0.0203           | 0.3374        | 0.3586        | 0.0212         |              |
| Lip and oral cavity cancer              | B.1.1    | -0.0057          | -0.0003           | -0.0060       | -0.0047       | 0.0013         |              |
| Nasopharynx cancer                      | B.1.2    | 0.0185           | -0.0007           | 0.0179        | 0.0144        | -0.0035        |              |
| Other pharynx cancer                    | B.1.3    | 0.0009           | 0.0000            | 0.0008        | 0.0006        | -0.0002        |              |
| Esophageal cancer                       | B.1.4    | 0.0715           | 0.0006            | 0.0721        | 0.0654        | -0.0067        |              |
| Stomach cancer                          | B.1.5    | 0.0650           | -0.0014           | 0.0637        | 0.0633        | -0.0004        |              |
| Colon and rectum cancer                 | B.1.6    | -0.0603          | -0.0063           | -0.0666       | -0.0446       | 0.0220         |              |
| Liver cancer                            | B.1.7    | 0.3406           | 0.0032            | 0.3439        | 0.2822        | -0.0616        |              |
| Gallbladder and biliary tract cancer    | B.1.8    | -0.0107          | -0.0002           | -0.0109       | -0.0078       | 0.0031         |              |
| Pancreatic cancer                       | B.1.9    | -0.0248          | -0.0003           | -0.0251       | -0.0187       | 0.0064         |              |
| Larynx cancer                           | B.1.10   | 0.0028           | -0.0003           | 0.0026        | 0.0027        | 0.0001         |              |
| Tracheal, bronchus, and lung cancer     | B.1.11   | -0.0820          | -0.0022           | -0.0842       | -0.0478       | 0.0364         |              |
| Malignant skin melanoma                 | B.1.12   | 0.0005           | -0.0001           | 0.0003        | 0.0004        | 0.0000         |              |
| Non-melanoma skin cancer                | B.1.13   | -0.0045          | 0.0000            | -0.0045       | -0.0031       | 0.0015         |              |
| Breast cancer                           | B.1.14   | 0.0043           | -0.0031           | 0.0013        | 0.0034        | 0.0021         |              |
| Cervical cancer                         | B.1.15   | -0.0046          | -0.0005           | -0.0051       | -0.0039       | 0.0012         |              |
| Uterine cancer                          | B.1.16   | 0.0014           | -0.0008           | 0.0007        | 0.0012        | 0.0005         |              |
| Ovarian cancer                          | B.1.17   | -0.0026          | -0.0002           | -0.0028       | -0.0024       | 0.0003         |              |
| Prostate cancer                         | B.1.18   | 0.0018           | -0.0018           | 0.0000        | 0.0019        | 0.0019         |              |
| Testicular cancer                       | B.1.19   | 0.0005           | -0.0001           | 0.0003        | 0.0004        | 0.0000         |              |
| Kidney cancer                           | B.1.20   | -0.0101          | -0.0006           | -0.0106       | -0.0073       | 0.0033         |              |
| Bladder cancer                          | B.1.21   | 0.0029           | -0.0008           | 0.0021        | 0.0024        | 0.0002         |              |
| Brain and central nervous system cancer | B.1.22   | 0.0108           | -0.0002           | 0.0105        | 0.0126        | 0.0020         |              |
| Thyroid cancer                          | B.1.23   | -0.0002          | -0.0002           | -0.0004       | -0.0001       | 0.0004         |              |
| Mesothelioma                            | B.1.24   | -0.0008          | 0.0000            | -0.0008       | -0.0007       | 0.0002         |              |
| Hodgkin lymphoma                        | B.1.25   | 0.0043           | 0.0000            | 0.0042        | 0.0034        | -0.0008        |              |

| Causes                                              | Level  | $\Delta$ HALE    |                   |              | $\Delta$ LE  |         | $\Delta$ LED |
|-----------------------------------------------------|--------|------------------|-------------------|--------------|--------------|---------|--------------|
|                                                     |        | Mortality Effect | Disability Effect | Total Effect | Total Effect |         |              |
| Non-Hodgkin lymphoma                                | B.1.26 | -0.0070          | -0.0013           | -0.0083      | -0.0054      | 0.0029  |              |
| Multiple myeloma                                    | B.1.27 | 0.0003           | -0.0001           | 0.0002       | 0.0002       | 0.0000  |              |
| Leukemia                                            | B.1.28 | 0.0372           | 0.0002            | 0.0374       | 0.0400       | 0.0026  |              |
| Other malignant neoplasms                           | B.1.29 | 0.0080           | -0.0019           | 0.0061       | 0.0108       | 0.0047  |              |
| Other neoplasms                                     | B.1.30 | -0.0005          | -0.0009           | -0.0014      | -0.0003      | 0.0012  |              |
| Cardiovascular diseases                             | B.2    | 0.4021           | -0.0119           | 0.3902       | 0.4180       | 0.0278  |              |
| Rheumatic heart disease                             | B.2.1  | 0.0915           | -0.0008           | 0.0907       | 0.0677       | -0.0230 |              |
| Ischemic heart disease                              | B.2.2  | -0.4836          | 0.0017            | -0.4820      | -0.2674      | 0.2146  |              |
| Stroke                                              | B.2.3  | 0.6466           | -0.0122           | 0.6344       | 0.5078       | -0.1266 |              |
| Hypertensive heart disease                          | B.2.4  | 0.1366           | 0.0032            | 0.1398       | 0.0960       | -0.0439 |              |
| Non-rheumatic valvular heart disease                | B.2.5  | 0.0022           | -0.0005           | 0.0018       | 0.0015       | -0.0003 |              |
| Cardiomyopathy and myocarditis                      | B.2.6  | -0.0046          | 0.0000            | -0.0046      | -0.0004      | 0.0042  |              |
| Atrial fibrillation and flutter                     | B.2.8  | 0.0029           | -0.0025           | 0.0004       | 0.0016       | 0.0012  |              |
| Aortic aneurysm                                     | B.2.9  | 0.0005           | 0.0000            | 0.0005       | 0.0003       | -0.0002 |              |
| Peripheral artery disease                           | B.2.10 | -0.0001          | 0.0011            | 0.0009       | -0.0001      | -0.0010 |              |
| Endocarditis                                        | B.2.11 | 0.0041           | 0.0000            | 0.0041       | 0.0049       | 0.0008  |              |
| Other cardiovascular and circulatory diseases       | B.2.12 | 0.0061           | -0.0020           | 0.0042       | 0.0061       | 0.0020  |              |
| Chronic respiratory diseases                        | B.3    | 1.2184           | 0.0718            | 1.2902       | 0.8150       | -0.4752 |              |
| Chronic obstructive pulmonary disease               | B.3.1  | 1.1761           | 0.0571            | 1.2331       | 0.7844       | -0.4488 |              |
| Pneumoconiosis                                      | B.3.2  | 0.0048           | 0.0026            | 0.0074       | 0.0041       | -0.0033 |              |
| Asthma                                              | B.3.3  | 0.0411           | 0.0138            | 0.0548       | 0.0285       | -0.0263 |              |
| Interstitial lung disease and pulmonary sarcoidosis | B.3.4  | -0.0015          | -0.0007           | -0.0021      | -0.0010      | 0.0012  |              |
| Other chronic respiratory diseases                  | B.3.5  | -0.0020          | -0.0010           | -0.0030      | -0.0010      | 0.0020  |              |
| Digestive diseases                                  | B.4    | 0.1758           | 0.0157            | 0.1916       | 0.1497       | -0.0419 |              |
| Cirrhosis and other chronic liver diseases          | B.4.1  | 0.0890           | 0.0014            | 0.0904       | 0.0727       | -0.0178 |              |
| Upper digestive system diseases                     | B.4.2  | 0.0357           | 0.0099            | 0.0456       | 0.0281       | -0.0175 |              |
| Appendicitis                                        | B.4.3  | 0.0041           | -0.0002           | 0.0039       | 0.0030       | -0.0010 |              |
| Paralytic ileus and intestinal obstruction          | B.4.4  | 0.0060           | -0.0001           | 0.0059       | 0.0130       | 0.0071  |              |
| Inguinal, femoral, and abdominal hernia             | B.4.5  | 0.0011           | 0.0005            | 0.0017       | 0.0021       | 0.0004  |              |
| Inflammatory bowel disease                          | B.4.6  | 0.0053           | -0.0008           | 0.0045       | 0.0039       | -0.0005 |              |
| Vascular intestinal disorders                       | B.4.7  | 0.0003           | 0.0000            | 0.0003       | 0.0003       | -0.0001 |              |
| Gallbladder and biliary diseases                    | B.4.8  | 0.0153           | 0.0043            | 0.0197       | 0.0113       | -0.0084 |              |
| Pancreatitis                                        | B.4.9  | 0.0036           | 0.0000            | 0.0036       | 0.0028       | -0.0008 |              |
| Other digestive diseases                            | B.4.10 | 0.0153           | 0.0006            | 0.0159       | 0.0126       | -0.0033 |              |
| Neurological disorders                              | B.5    | 0.0043           | -0.0202           | -0.0159      | 0.0116       | 0.0275  |              |
| Alzheimer's disease and other dementias             | B.5.1  | -0.0193          | -0.0037           | -0.0229      | -0.0108      | 0.0122  |              |
| Parkinson's disease                                 | B.5.2  | 0.0061           | -0.0005           | 0.0055       | 0.0040       | -0.0015 |              |
| Idiopathic epilepsy                                 | B.5.3  | 0.0149           | 0.0060            | 0.0209       | 0.0138       | -0.0071 |              |
| Multiple sclerosis                                  | B.5.4  | 0.0008           | 0.0000            | 0.0008       | 0.0006       | -0.0002 |              |
| Motor neuron disease                                | B.5.5  | 0.0018           | 0.0000            | 0.0018       | 0.0031       | 0.0012  |              |
| Headache disorders                                  | B.5.6  | 0.0000           | -0.0213           | -0.0213      | 0.0000       | 0.0213  |              |
| Other neurological disorders                        | B.5.7  | -0.0001          | -0.0007           | -0.0007      | 0.0009       | 0.0016  |              |

| Causes                                           | Level  | $\Delta$ HALE    |                   |              | $\Delta$ LE  |         | $\Delta$ LED |
|--------------------------------------------------|--------|------------------|-------------------|--------------|--------------|---------|--------------|
|                                                  |        | Mortality Effect | Disability Effect | Total Effect | Total Effect |         |              |
| Mental disorders                                 | B.6    | 0.0000           | 0.0444            | 0.0444       | 0.0000       | -0.0444 |              |
| Schizophrenia                                    | B.6.1  | 0.0000           | -0.0018           | -0.0018      | 0.0000       | 0.0018  |              |
| Depressive disorders                             | B.6.2  | 0.0000           | 0.0203            | 0.0203       | 0.0000       | -0.0203 |              |
| Bipolar disorder                                 | B.6.3  | 0.0000           | -0.0001           | -0.0001      | 0.0000       | 0.0001  |              |
| Anxiety disorders                                | B.6.4  | 0.0000           | 0.0262            | 0.0262       | 0.0000       | -0.0262 |              |
| Eating disorders                                 | B.6.5  | 0.0000           | -0.0022           | -0.0022      | 0.0000       | 0.0022  |              |
| Autism spectrum disorders                        | B.6.6  | 0.0000           | -0.0004           | -0.0004      | 0.0000       | 0.0004  |              |
| Attention-deficit/hyperactivity disorder         | B.6.7  | 0.0000           | 0.0001            | 0.0001       | 0.0000       | -0.0001 |              |
| Conduct disorder                                 | B.6.8  | 0.0000           | -0.0012           | -0.0012      | 0.0000       | 0.0012  |              |
| Idiopathic developmental intellectual disability | B.6.9  | 0.0000           | 0.0036            | 0.0036       | 0.0000       | -0.0036 |              |
| Other mental disorders                           | B.6.10 | 0.0000           | -0.0001           | -0.0001      | 0.0000       | 0.0001  |              |
| Substance use disorders                          | B.7    | 0.0554           | 0.0133            | 0.0687       | 0.0394       | -0.0293 |              |
| Alcohol use disorders                            | B.7.1  | -0.0099          | 0.0072            | -0.0027      | -0.0079      | -0.0052 |              |
| Drug use disorders                               | B.7.2  | 0.0653           | 0.0061            | 0.0713       | 0.0472       | -0.0241 |              |
| Diabetes and kidney diseases                     | B.8    | 0.0207           | -0.0865           | -0.0658      | 0.0264       | 0.0923  |              |
| Diabetes mellitus                                | B.8.1  | 0.0033           | -0.0606           | -0.0572      | 0.0081       | 0.0653  |              |
| Chronic kidney disease                           | B.8.2  | 0.0126           | -0.0260           | -0.0134      | 0.0143       | 0.0278  |              |
| Acute glomerulonephritis                         | B.8.3  | 0.0048           | 0.0000            | 0.0048       | 0.0040       | -0.0008 |              |
| Skin and subcutaneous diseases                   | B.9    | 0.0068           | -0.0034           | 0.0033       | 0.0056       | 0.0023  |              |
| Dermatitis                                       | B.9.1  | 0.0000           | -0.0008           | -0.0008      | 0.0000       | 0.0008  |              |
| Psoriasis                                        | B.9.2  | 0.0000           | 0.0035            | 0.0035       | 0.0000       | -0.0035 |              |
| Bacterial skin diseases                          | B.9.3  | 0.0070           | 0.0001            | 0.0071       | 0.0053       | -0.0017 |              |
| Scabies                                          | B.9.4  | 0.0000           | 0.0004            | 0.0004       | 0.0000       | -0.0004 |              |
| Fungal skin diseases                             | B.9.5  | 0.0000           | 0.0003            | 0.0003       | 0.0000       | -0.0003 |              |
| Viral skin diseases                              | B.9.6  | 0.0000           | -0.0001           | -0.0001      | 0.0000       | 0.0001  |              |
| Acne vulgaris                                    | B.9.7  | 0.0000           | -0.0049           | -0.0049      | 0.0000       | 0.0049  |              |
| Alopecia areata                                  | B.9.8  | 0.0000           | 0.0000            | 0.0000       | 0.0000       | 0.0000  |              |
| Pruritus                                         | B.9.9  | 0.0000           | -0.0003           | -0.0003      | 0.0000       | 0.0003  |              |
| Urticaria                                        | B.9.10 | 0.0000           | 0.0000            | 0.0000       | 0.0000       | 0.0000  |              |
| Decubitus ulcer                                  | B.9.11 | -0.0016          | -0.0001           | -0.0017      | -0.0009      | 0.0008  |              |
| Other skin and subcutaneous diseases             | B.9.12 | 0.0013           | -0.0015           | -0.0001      | 0.0011       | 0.0013  |              |
| Sense organ diseases                             | B.10   | 0.0000           | 0.0381            | 0.0381       | 0.0000       | -0.0381 |              |
| Blindness and vision loss                        | B.10.1 | 0.0000           | 0.0318            | 0.0318       | 0.0000       | -0.0318 |              |
| Age-related and other hearing loss               | B.10.2 | 0.0000           | 0.0068            | 0.0068       | 0.0000       | -0.0068 |              |
| Other sense organ diseases                       | B.10.3 | 0.0000           | -0.0004           | -0.0004      | 0.0000       | 0.0004  |              |
| Musculoskeletal disorders                        | B.11   | -0.0019          | -0.0383           | -0.0402      | -0.0013      | 0.0390  |              |
| Rheumatoid arthritis                             | B.11.1 | -0.0021          | -0.0015           | -0.0036      | -0.0014      | 0.0022  |              |
| Osteoarthritis                                   | B.11.2 | 0.0000           | -0.0170           | -0.0170      | 0.0000       | 0.0170  |              |
| Low back pain                                    | B.11.3 | 0.0000           | 0.0217            | 0.0217       | 0.0000       | -0.0217 |              |
| Neck pain                                        | B.11.4 | 0.0000           | -0.0047           | -0.0047      | 0.0000       | 0.0047  |              |
| Gout                                             | B.11.5 | 0.0000           | -0.0038           | -0.0038      | 0.0000       | 0.0038  |              |
| Other musculoskeletal disorders                  | B.11.6 | 0.0002           | -0.0330           | -0.0328      | 0.0001       | 0.0329  |              |

| Causes                                            | Level  | $\Delta$ HALE    |                   |              | $\Delta$ LE  |              | $\Delta$ LED |
|---------------------------------------------------|--------|------------------|-------------------|--------------|--------------|--------------|--------------|
|                                                   |        | Mortality Effect | Disability Effect | Total Effect | Total Effect | Total Effect |              |
| Other non-communicable diseases                   | B.12   | 0.0414           | 0.0475            | 0.0888       | 0.2388       | 0.1500       |              |
| Congenital birth defects                          | B.12.1 | 0.0271           | 0.0040            | 0.0311       | 0.2157       | 0.1846       |              |
| Urinary diseases and male infertility             | B.12.2 | 0.0071           | 0.0003            | 0.0074       | 0.0056       | -0.0018      |              |
| Gynecological diseases                            | B.12.3 | -0.0007          | 0.0449            | 0.0442       | -0.0006      | -0.0448      |              |
| Hemoglobinopathies and hemolytic anemias          | B.12.4 | 0.0047           | 0.0215            | 0.0262       | 0.0071       | -0.0191      |              |
| Endocrine, metabolic, blood, and immune disorders | B.12.5 | 0.0032           | 0.0038            | 0.0070       | 0.0056       | -0.0015      |              |
| Oral disorders                                    | B.12.6 | 0.0000           | -0.0271           | -0.0271      | 0.0000       | 0.0271       |              |
| <b>Injuries</b>                                   | C      | 0.2456           | 0.0724            | 0.3180       | 0.3139       | -0.0041      |              |
| Transport injuries                                | C.1    | 0.0009           | -0.0162           | -0.0153      | 0.0140       | 0.0292       |              |
| Road injuries                                     | C.1.1  | -0.0094          | -0.0180           | -0.0274      | 0.0051       | 0.0326       |              |
| Other transport injuries                          | C.1.2  | 0.0104           | 0.0018            | 0.0122       | 0.0089       | -0.0033      |              |
| Unintentional injuries                            | C.2    | 0.0301           | 0.0841            | 0.1142       | 0.1421       | 0.0279       |              |
| Falls                                             | C.2.1  | -0.0519          | 0.0708            | 0.0189       | -0.0223      | -0.0411      |              |
| Drowning                                          | C.2.2  | 0.0983           | 0.0008            | 0.0991       | 0.1203       | 0.0212       |              |
| Fire, heat, and hot substances                    | C.2.3  | 0.0077           | 0.0004            | 0.0081       | 0.0099       | 0.0018       |              |
| Poisonings                                        | C.2.4  | -0.0120          | 0.0001            | -0.0119      | -0.0004      | 0.0115       |              |
| Exposure to mechanical forces                     | C.2.5  | -0.0142          | -0.0029           | -0.0171      | 0.0015       | 0.0186       |              |
| Adverse effects of medical treatment              | C.2.6  | 0.0082           | 0.0001            | 0.0083       | 0.0111       | 0.0028       |              |
| Animal contact                                    | C.2.7  | 0.0078           | 0.0022            | 0.0100       | 0.0077       | -0.0024      |              |
| Foreign body                                      | C.2.8  | 0.0021           | 0.0121            | 0.0142       | 0.0231       | 0.0089       |              |
| Environmental heat and cold exposure              | C.2.9  | 0.0084           | 0.0010            | 0.0094       | 0.0083       | -0.0010      |              |
| Exposure to forces of nature                      | C.2.10 | 0.0003           | -0.0018           | -0.0015      | 0.0002       | 0.0018       |              |
| Other unintentional injuries                      | C.2.11 | -0.0246          | 0.0013            | -0.0233      | -0.0172      | 0.0061       |              |
| Self-harm and interpersonal violence              | C.3    | 0.2145           | 0.0046            | 0.2191       | 0.1577       | -0.0613      |              |
| Self-harm                                         | C.3.1  | 0.1771           | 0.0022            | 0.1793       | 0.1247       | -0.0546      |              |
| Interpersonal violence                            | C.3.2  | 0.0324           | 0.0024            | 0.0348       | 0.0296       | -0.0053      |              |
| Conflict and terrorism                            | C.3.3  | -0.0005          | 0.0000            | -0.0005      | -0.0004      | 0.0001       |              |
| Executions and police conflict                    | C.3.4  | 0.0055           | 0.0000            | 0.0055       | 0.0039       | -0.0016      |              |

**Table S5 | Cause-specific effects of mortality and disability (years) on changes in life expectancy (LE) and health-adjusted life expectancy (HALE) from 2010 to 2019.**

| Causes                                                            | Level  | $\Delta$ HALE    |                   | $\Delta$ LE  |              | $\Delta$ LED |
|-------------------------------------------------------------------|--------|------------------|-------------------|--------------|--------------|--------------|
|                                                                   |        | Mortality Effect | Disability Effect | Total Effect | Total Effect |              |
| <b>Communicable, maternal, neonatal, and nutritional diseases</b> | A      | 0.1174           | -0.0094           | 0.1080       | 0.4863       | 0.3783       |
| HIV/AIDS and sexually transmitted infections                      | A.1    | -0.0172          | -0.0012           | -0.0184      | -0.0144      | 0.0040       |
| HIV/AIDS                                                          | A.1.1  | -0.0174          | -0.0008           | -0.0182      | -0.0183      | -0.0001      |
| Sexually transmitted infections excluding HIV                     | A.1.2  | 0.0002           | -0.0004           | -0.0002      | 0.0039       | 0.0041       |
| Respiratory infections and tuberculosis                           | A.2    | 0.1098           | 0.0098            | 0.1195       | 0.2166       | 0.0970       |
| Tuberculosis                                                      | A.2.1  | 0.0331           | 0.0081            | 0.0411       | 0.0415       | 0.0004       |
| Lower respiratory infections                                      | A.2.2  | 0.0745           | 0.0005            | 0.0750       | 0.1723       | 0.0973       |
| Upper respiratory infections                                      | A.2.3  | 0.0022           | -0.0005           | 0.0017       | 0.0028       | 0.0011       |
| Otitis media                                                      | A.2.4  | 0.0000           | 0.0017            | 0.0017       | 0.0000       | -0.0017      |
| Enteric infections                                                | A.3    | 0.0042           | -0.0090           | -0.0048      | 0.0149       | 0.0197       |
| Diarrheal diseases                                                | A.3.1  | 0.0035           | -0.0090           | -0.0056      | 0.0139       | 0.0195       |
| Typhoid and paratyphoid                                           | A.3.2  | 0.0005           | 0.0000            | 0.0006       | 0.0007       | 0.0001       |
| Invasive Non-typhoidal Salmonella (iNTS)                          | A.3.3  | 0.0002           | 0.0000            | 0.0002       | 0.0002       | 0.0000       |
| Other intestinal infectious diseases                              | A.3.4  | 0.0001           | 0.0000            | 0.0001       | 0.0001       | 0.0001       |
| Neglected tropical diseases and malaria                           | A.4    | 0.0029           | 0.0072            | 0.0101       | 0.0039       | -0.0061      |
| Malaria                                                           | A.4.1  | 0.0000           | 0.0000            | 0.0001       | 0.0000       | 0.0000       |
| Chagas disease                                                    | A.4.2  | 0.0000           | 0.0000            | 0.0000       | 0.0000       | 0.0000       |
| Leishmaniasis                                                     | A.4.3  | 0.0000           | 0.0000            | 0.0000       | 0.0000       | 0.0000       |
| African trypanosomiasis                                           | A.4.4  | 0.0000           | 0.0000            | 0.0000       | 0.0000       | 0.0000       |
| Schistosomiasis                                                   | A.4.5  | 0.0003           | 0.0005            | 0.0008       | 0.0004       | -0.0005      |
| Cysticercosis                                                     | A.4.6  | 0.0000           | 0.0034            | 0.0034       | 0.0000       | -0.0034      |
| Cystic echinococcosis                                             | A.4.7  | 0.0000           | 0.0000            | 0.0000       | 0.0000       | 0.0000       |
| Lymphatic filariasis                                              | A.4.8  | 0.0000           | 0.0000            | 0.0000       | 0.0000       | 0.0000       |
| Onchocerciasis                                                    | A.4.9  | 0.0000           | 0.0000            | 0.0000       | 0.0000       | 0.0000       |
| Trachoma                                                          | A.4.10 | 0.0000           | 0.0003            | 0.0003       | 0.0000       | -0.0003      |
| Dengue                                                            | A.4.11 | 0.0000           | -0.0008           | -0.0008      | 0.0000       | 0.0008       |
| Yellow fever                                                      | A.4.12 | 0.0000           | 0.0000            | 0.0000       | 0.0000       | 0.0000       |
| Rabies                                                            | A.4.13 | 0.0022           | 0.0000            | 0.0022       | 0.0031       | 0.0008       |
| Intestinal nematode infections                                    | A.4.14 | 0.0000           | 0.0017            | 0.0017       | 0.0001       | -0.0016      |
| Food-borne trematodiasis                                          | A.4.15 | 0.0000           | 0.0013            | 0.0013       | 0.0000       | -0.0013      |
| Leprosy                                                           | A.4.16 | 0.0000           | 0.0000            | 0.0000       | 0.0000       | 0.0000       |
| Ebola                                                             | A.4.17 | 0.0000           | 0.0000            | 0.0000       | 0.0000       | 0.0000       |
| Zika virus                                                        | A.4.18 | 0.0000           | 0.0000            | 0.0000       | 0.0000       | 0.0000       |
| Guinea worm disease                                               | A.4.19 | 0.0000           | 0.0000            | 0.0000       | 0.0000       | 0.0000       |
| Other neglected tropical diseases                                 | A.4.20 | 0.0003           | 0.0009            | 0.0012       | 0.0004       | -0.0007      |
| Other infectious diseases                                         | A.5    | 0.0104           | 0.0027            | 0.0132       | 0.0366       | 0.0235       |
| Meningitis                                                        | A.5.1  | 0.0038           | 0.0005            | 0.0043       | 0.0116       | 0.0073       |
| Encephalitis                                                      | A.5.2  | 0.0020           | 0.0007            | 0.0028       | 0.0068       | 0.0041       |
| Diphtheria                                                        | A.5.3  | 0.0000           | 0.0000            | 0.0000       | 0.0001       | 0.0000       |

| Causes                                  | Level    | $\Delta$ HALE    |                   |               | $\Delta$ LE   |               | $\Delta$ LED |
|-----------------------------------------|----------|------------------|-------------------|---------------|---------------|---------------|--------------|
|                                         |          | Mortality Effect | Disability Effect | Total Effect  | Total Effect  |               |              |
| Whooping cough                          | A.5.4    | 0.0021           | 0.0004            | 0.0026        | 0.0136        | 0.0110        |              |
| Tetanus                                 | A.5.5    | 0.0004           | 0.0000            | 0.0004        | 0.0009        | 0.0006        |              |
| Measles                                 | A.5.6    | -0.0001          | -0.0001           | -0.0002       | -0.0004       | -0.0002       |              |
| Varicella and herpes zoster             | A.5.7    | 0.0005           | -0.0001           | 0.0004        | 0.0007        | 0.0003        |              |
| Acute hepatitis                         | A.5.8    | 0.0017           | 0.0007            | 0.0024        | 0.0027        | 0.0003        |              |
| Other unspecified infectious diseases   | A.5.9    | -0.0001          | 0.0006            | 0.0004        | 0.0006        | 0.0001        |              |
| Maternal and neonatal disorders         | A.6      | 0.0084           | -0.0349           | -0.0265       | 0.2248        | 0.2513        |              |
| Maternal disorders                      | A.6.1    | 0.0055           | 0.0003            | 0.0058        | 0.0044        | -0.0014       |              |
| Neonatal disorders                      | A.6.2    | 0.0029           | -0.0352           | -0.0323       | 0.2204        | 0.2527        |              |
| Nutritional deficiencies                | A.7      | -0.0011          | 0.0160            | 0.0149        | 0.0038        | -0.0111       |              |
| Protein-energy malnutrition             | A.7.1    | -0.0013          | -0.0044           | -0.0057       | 0.0024        | 0.0081        |              |
| Iodine deficiency                       | A.7.2    | 0.0000           | 0.0024            | 0.0024        | 0.0000        | -0.0024       |              |
| Vitamin A deficiency                    | A.7.3    | 0.0000           | 0.0001            | 0.0001        | 0.0000        | -0.0001       |              |
| Dietary iron deficiency                 | A.7.4    | 0.0000           | 0.0190            | 0.0190        | 0.0000        | -0.0190       |              |
| Other nutritional deficiencies          | A.7.5    | 0.0002           | -0.0012           | -0.0010       | 0.0014        | 0.0023        |              |
| <b>Non-communicable diseases</b>        | <b>B</b> | <b>1.9068</b>    | <b>0.0191</b>     | <b>1.9259</b> | <b>2.2493</b> | <b>0.3234</b> |              |
| Neoplasms                               | B.1      | 0.2699           | -0.0122           | 0.2577        | 0.3712        | 0.1135        |              |
| Lip and oral cavity cancer              | B.1.1    | 0.0010           | -0.0001           | 0.0009        | 0.0015        | 0.0005        |              |
| Nasopharynx cancer                      | B.1.2    | 0.0038           | -0.0009           | 0.0029        | 0.0054        | 0.0025        |              |
| Other pharynx cancer                    | B.1.3    | 0.0001           | 0.0000            | 0.0001        | 0.0002        | 0.0001        |              |
| Esophageal cancer                       | B.1.4    | 0.0749           | 0.0013            | 0.0762        | 0.0986        | 0.0224        |              |
| Stomach cancer                          | B.1.5    | 0.1380           | 0.0015            | 0.1395        | 0.1779        | 0.0383        |              |
| Colon and rectum cancer                 | B.1.6    | 0.0017           | -0.0038           | -0.0020       | 0.0073        | 0.0093        |              |
| Liver cancer                            | B.1.7    | -0.0044          | -0.0003           | -0.0047       | -0.0051       | -0.0004       |              |
| Gallbladder and biliary tract cancer    | B.1.8    | 0.0045           | 0.0001            | 0.0046        | 0.0059        | 0.0013        |              |
| Pancreatic cancer                       | B.1.9    | -0.0102          | -0.0002           | -0.0104       | -0.0114       | -0.0010       |              |
| Larynx cancer                           | B.1.10   | 0.0015           | -0.0002           | 0.0013        | 0.0021        | 0.0008        |              |
| Tracheal, bronchus, and lung cancer     | B.1.11   | 0.0256           | -0.0005           | 0.0251        | 0.0380        | 0.0130        |              |
| Malignant skin melanoma                 | B.1.12   | 0.0002           | -0.0001           | 0.0001        | 0.0003        | 0.0002        |              |
| Non-melanoma skin cancer                | B.1.13   | 0.0018           | -0.0001           | 0.0017        | 0.0022        | 0.0005        |              |
| Breast cancer                           | B.1.14   | -0.0007          | -0.0027           | -0.0034       | -0.0001       | 0.0033        |              |
| Cervical cancer                         | B.1.15   | 0.0027           | -0.0001           | 0.0026        | 0.0030        | 0.0005        |              |
| Uterine cancer                          | B.1.16   | 0.0077           | 0.0006            | 0.0083        | 0.0098        | 0.0015        |              |
| Ovarian cancer                          | B.1.17   | -0.0031          | -0.0002           | -0.0033       | -0.0040       | -0.0007       |              |
| Prostate cancer                         | B.1.18   | 0.0012           | -0.0016           | -0.0004       | 0.0022        | 0.0025        |              |
| Testicular cancer                       | B.1.19   | -0.0002          | -0.0002           | -0.0003       | -0.0002       | 0.0002        |              |
| Kidney cancer                           | B.1.20   | -0.0001          | -0.0002           | -0.0003       | 0.0004        | 0.0008        |              |
| Bladder cancer                          | B.1.21   | 0.0014           | -0.0006           | 0.0009        | 0.0025        | 0.0016        |              |
| Brain and central nervous system cancer | B.1.22   | 0.0018           | -0.0004           | 0.0015        | 0.0037        | 0.0022        |              |
| Thyroid cancer                          | B.1.23   | 0.0006           | -0.0001           | 0.0004        | 0.0007        | 0.0003        |              |
| Mesothelioma                            | B.1.24   | 0.0004           | 0.0000            | 0.0004        | 0.0005        | 0.0001        |              |
| Hodgkin lymphoma                        | B.1.25   | 0.0007           | -0.0001           | 0.0006        | 0.0009        | 0.0003        |              |



| Causes                                              | Level  | $\Delta$ HALE    |                   |              | $\Delta$ LE  |         | $\Delta$ LED |
|-----------------------------------------------------|--------|------------------|-------------------|--------------|--------------|---------|--------------|
|                                                     |        | Mortality Effect | Disability Effect | Total Effect | Total Effect |         |              |
| Non-Hodgkin lymphoma                                | B.1.26 | -0.0004          | -0.0011           | -0.0015      | 0.0003       | 0.0018  |              |
| Multiple myeloma                                    | B.1.27 | -0.0007          | -0.0001           | -0.0008      | -0.0007      | 0.0001  |              |
| Leukemia                                            | B.1.28 | 0.0141           | -0.0007           | 0.0133       | 0.0208       | 0.0075  |              |
| Other malignant neoplasms                           | B.1.29 | 0.0061           | -0.0012           | 0.0049       | 0.0086       | 0.0037  |              |
| Other neoplasms                                     | B.1.30 | -0.0002          | -0.0003           | -0.0005      | -0.0001      | 0.0004  |              |
| Cardiovascular diseases                             | B.2    | 0.8607           | -0.0529           | 0.8078       | 0.9477       | 0.1399  |              |
| Rheumatic heart disease                             | B.2.1  | 0.0425           | 0.0001            | 0.0426       | 0.0475       | 0.0049  |              |
| Ischemic heart disease                              | B.2.2  | 0.2011           | -0.0020           | 0.1991       | 0.2095       | 0.0103  |              |
| Stroke                                              | B.2.3  | 0.6161           | -0.0439           | 0.5722       | 0.6783       | 0.1061  |              |
| Hypertensive heart disease                          | B.2.4  | -0.0097          | -0.0022           | -0.0119      | -0.0055      | 0.0064  |              |
| Non-rheumatic valvular heart disease                | B.2.5  | 0.0013           | -0.0004           | 0.0009       | 0.0013       | 0.0004  |              |
| Cardiomyopathy and myocarditis                      | B.2.6  | 0.0059           | -0.0001           | 0.0058       | 0.0101       | 0.0042  |              |
| Atrial fibrillation and flutter                     | B.2.8  | -0.0002          | -0.0049           | -0.0050      | 0.0007       | 0.0057  |              |
| Aortic aneurysm                                     | B.2.9  | 0.0004           | 0.0000            | 0.0004       | 0.0007       | 0.0003  |              |
| Peripheral artery disease                           | B.2.10 | -0.0001          | 0.0005            | 0.0004       | 0.0000       | -0.0005 |              |
| Endocarditis                                        | B.2.11 | 0.0003           | 0.0000            | 0.0003       | 0.0007       | 0.0004  |              |
| Other cardiovascular and circulatory diseases       | B.2.12 | 0.0030           | 0.0000            | 0.0030       | 0.0045       | 0.0015  |              |
| Chronic respiratory diseases                        | B.3    | 0.5909           | 0.0411            | 0.6321       | 0.5984       | -0.0336 |              |
| Chronic obstructive pulmonary disease               | B.3.1  | 0.5702           | 0.0476            | 0.6178       | 0.5758       | -0.0420 |              |
| Pneumoconiosis                                      | B.3.2  | 0.0040           | 0.0034            | 0.0074       | 0.0046       | -0.0028 |              |
| Asthma                                              | B.3.3  | 0.0138           | -0.0100           | 0.0037       | 0.0144       | 0.0107  |              |
| Interstitial lung disease and pulmonary sarcoidosis | B.3.4  | 0.0009           | -0.0004           | 0.0004       | 0.0012       | 0.0008  |              |
| Other chronic respiratory diseases                  | B.3.5  | 0.0022           | 0.0006            | 0.0027       | 0.0024       | -0.0004 |              |
| Digestive diseases                                  | B.4    | 0.0983           | 0.0055            | 0.1038       | 0.1241       | 0.0204  |              |
| Cirrhosis and other chronic liver diseases          | B.4.1  | 0.0528           | 0.0002            | 0.0530       | 0.0660       | 0.0129  |              |
| Upper digestive system diseases                     | B.4.2  | 0.0274           | -0.0008           | 0.0266       | 0.0310       | 0.0044  |              |
| Appendicitis                                        | B.4.3  | 0.0011           | -0.0001           | 0.0010       | 0.0012       | 0.0002  |              |
| Paralytic ileus and intestinal obstruction          | B.4.4  | 0.0039           | 0.0001            | 0.0040       | 0.0103       | 0.0063  |              |
| Inguinal, femoral, and abdominal hernia             | B.4.5  | 0.0005           | 0.0000            | 0.0005       | 0.0012       | 0.0007  |              |
| Inflammatory bowel disease                          | B.4.6  | 0.0023           | -0.0006           | 0.0017       | 0.0027       | 0.0010  |              |
| Vascular intestinal disorders                       | B.4.7  | 0.0006           | 0.0000            | 0.0006       | 0.0007       | 0.0001  |              |
| Gallbladder and biliary diseases                    | B.4.8  | 0.0053           | 0.0068            | 0.0120       | 0.0056       | -0.0064 |              |
| Pancreatitis                                        | B.4.9  | 0.0025           | 0.0000            | 0.0025       | 0.0029       | 0.0004  |              |
| Other digestive diseases                            | B.4.10 | 0.0017           | 0.0001            | 0.0018       | 0.0025       | 0.0007  |              |
| Neurological disorders                              | B.5    | 0.0287           | -0.0175           | 0.0112       | 0.0315       | 0.0204  |              |
| Alzheimer's disease and other dementias             | B.5.1  | 0.0166           | -0.0155           | 0.0012       | 0.0161       | 0.0150  |              |
| Parkinson's disease                                 | B.5.2  | 0.0089           | 0.0006            | 0.0095       | 0.0101       | 0.0006  |              |
| Idiopathic epilepsy                                 | B.5.3  | 0.0040           | 0.0057            | 0.0096       | 0.0054       | -0.0042 |              |
| Multiple sclerosis                                  | B.5.4  | 0.0001           | -0.0001           | 0.0000       | 0.0002       | 0.0001  |              |
| Motor neuron disease                                | B.5.5  | -0.0005          | -0.0001           | -0.0006      | -0.0005      | 0.0001  |              |
| Headache disorders                                  | B.5.6  | 0.0000           | -0.0073           | -0.0073      | 0.0000       | 0.0073  |              |
| Other neurological disorders                        | B.5.7  | -0.0004          | -0.0009           | -0.0013      | 0.0002       | 0.0015  |              |

| Causes                                           | Level  | $\Delta$ HALE    |                   |              | $\Delta$ LE  |         | $\Delta$ LED |
|--------------------------------------------------|--------|------------------|-------------------|--------------|--------------|---------|--------------|
|                                                  |        | Mortality Effect | Disability Effect | Total Effect | Total Effect |         |              |
| Mental disorders                                 | B.6    | 0.0000           | -0.0049           | -0.0049      | 0.0000       | 0.0049  |              |
| Schizophrenia                                    | B.6.1  | 0.0000           | -0.0030           | -0.0030      | 0.0000       | 0.0030  |              |
| Depressive disorders                             | B.6.2  | 0.0000           | -0.0092           | -0.0092      | 0.0000       | 0.0092  |              |
| Bipolar disorder                                 | B.6.3  | 0.0000           | 0.0001            | 0.0001       | 0.0000       | -0.0001 |              |
| Anxiety disorders                                | B.6.4  | 0.0000           | 0.0085            | 0.0085       | 0.0000       | -0.0085 |              |
| Eating disorders                                 | B.6.5  | 0.0000           | -0.0032           | -0.0032      | 0.0000       | 0.0032  |              |
| Autism spectrum disorders                        | B.6.6  | 0.0000           | -0.0003           | -0.0003      | 0.0000       | 0.0003  |              |
| Attention-deficit/hyperactivity disorder         | B.6.7  | 0.0000           | 0.0002            | 0.0002       | 0.0000       | -0.0002 |              |
| Conduct disorder                                 | B.6.8  | 0.0000           | -0.0001           | -0.0001      | 0.0000       | 0.0001  |              |
| Idiopathic developmental intellectual disability | B.6.9  | 0.0000           | 0.0020            | 0.0020       | 0.0000       | -0.0020 |              |
| Other mental disorders                           | B.6.10 | 0.0000           | 0.0001            | 0.0001       | 0.0000       | -0.0001 |              |
| Substance use disorders                          | B.7    | 0.0035           | -0.0229           | -0.0194      | 0.0048       | 0.0241  |              |
| Alcohol use disorders                            | B.7.1  | 0.0049           | -0.0089           | -0.0040      | 0.0060       | 0.0100  |              |
| Drug use disorders                               | B.7.2  | -0.0013          | -0.0140           | -0.0154      | -0.0012      | 0.0142  |              |
| Diabetes and kidney diseases                     | B.8    | 0.0334           | 0.0402            | 0.0736       | 0.0431       | -0.0304 |              |
| Diabetes mellitus                                | B.8.1  | 0.0067           | 0.0275            | 0.0342       | 0.0118       | -0.0224 |              |
| Chronic kidney disease                           | B.8.2  | 0.0235           | 0.0127            | 0.0362       | 0.0278       | -0.0084 |              |
| Acute glomerulonephritis                         | B.8.3  | 0.0031           | 0.0000            | 0.0031       | 0.0036       | 0.0004  |              |
| Skin and subcutaneous diseases                   | B.9    | 0.0025           | -0.0025           | 0.0000       | 0.0024       | 0.0024  |              |
| Dermatitis                                       | B.9.1  | 0.0000           | -0.0006           | -0.0006      | 0.0000       | 0.0006  |              |
| Psoriasis                                        | B.9.2  | 0.0000           | 0.0033            | 0.0033       | 0.0000       | -0.0033 |              |
| Bacterial skin diseases                          | B.9.3  | 0.0002           | 0.0000            | 0.0002       | 0.0004       | 0.0002  |              |
| Scabies                                          | B.9.4  | 0.0000           | 0.0005            | 0.0005       | 0.0000       | -0.0005 |              |
| Fungal skin diseases                             | B.9.5  | 0.0000           | 0.0001            | 0.0001       | 0.0000       | -0.0001 |              |
| Viral skin diseases                              | B.9.6  | 0.0000           | 0.0000            | 0.0000       | 0.0000       | 0.0000  |              |
| Acne vulgaris                                    | B.9.7  | 0.0000           | -0.0040           | -0.0040      | 0.0000       | 0.0040  |              |
| Alopecia areata                                  | B.9.8  | 0.0000           | 0.0000            | 0.0000       | 0.0000       | 0.0000  |              |
| Pruritus                                         | B.9.9  | 0.0000           | -0.0003           | -0.0003      | 0.0000       | 0.0003  |              |
| Urticaria                                        | B.9.10 | 0.0000           | 0.0000            | 0.0000       | 0.0000       | 0.0000  |              |
| Decubitus ulcer                                  | B.9.11 | 0.0022           | 0.0000            | 0.0022       | 0.0019       | -0.0003 |              |
| Other skin and subcutaneous diseases             | B.9.12 | 0.0001           | -0.0017           | -0.0016      | 0.0001       | 0.0017  |              |
| Sense organ diseases                             | B.10   | 0.0000           | 0.0459            | 0.0459       | 0.0000       | -0.0459 |              |
| Blindness and vision loss                        | B.10.1 | 0.0000           | 0.0297            | 0.0297       | 0.0000       | -0.0297 |              |
| Age-related and other hearing loss               | B.10.2 | 0.0000           | 0.0169            | 0.0169       | 0.0000       | -0.0169 |              |
| Other sense organ diseases                       | B.10.3 | 0.0000           | -0.0007           | -0.0007      | 0.0000       | 0.0007  |              |
| Musculoskeletal disorders                        | B.11   | 0.0020           | -0.0001           | 0.0018       | 0.0024       | 0.0006  |              |
| Rheumatoid arthritis                             | B.11.1 | 0.0010           | 0.0013            | 0.0023       | 0.0015       | -0.0009 |              |
| Osteoarthritis                                   | B.11.2 | 0.0000           | -0.0046           | -0.0046      | 0.0000       | 0.0046  |              |
| Low back pain                                    | B.11.3 | 0.0000           | 0.0265            | 0.0265       | 0.0000       | -0.0265 |              |
| Neck pain                                        | B.11.4 | 0.0000           | -0.0001           | -0.0001      | 0.0000       | 0.0001  |              |
| Gout                                             | B.11.5 | 0.0000           | -0.0035           | -0.0035      | 0.0000       | 0.0035  |              |
| Other musculoskeletal disorders                  | B.11.6 | 0.0009           | -0.0197           | -0.0188      | 0.0009       | 0.0197  |              |

| Causes                                            | Level  | $\Delta$ HALE    |                   |              | $\Delta$ LE  |         | $\Delta$ LED |
|---------------------------------------------------|--------|------------------|-------------------|--------------|--------------|---------|--------------|
|                                                   |        | Mortality Effect | Disability Effect | Total Effect | Total Effect |         |              |
| Other non-communicable diseases                   | B.12   | 0.0170           | -0.0006           | 0.0164       | 0.1236       | 0.1072  |              |
| Congenital birth defects                          | B.12.1 | 0.0107           | 0.0014            | 0.0122       | 0.1115       | 0.0993  |              |
| Urinary diseases and male infertility             | B.12.2 | 0.0045           | 0.0005            | 0.0050       | 0.0050       | 0.0000  |              |
| Gynecological diseases                            | B.12.3 | 0.0002           | -0.0024           | -0.0022      | 0.0002       | 0.0024  |              |
| Hemoglobinopathies and hemolytic anemias          | B.12.4 | 0.0038           | 0.0083            | 0.0122       | 0.0060       | -0.0062 |              |
| Endocrine, metabolic, blood, and immune disorders | B.12.5 | -0.0023          | -0.0009           | -0.0032      | -0.0009      | 0.0023  |              |
| Oral disorders                                    | B.12.6 | 0.0000           | -0.0075           | -0.0075      | 0.0000       | 0.0075  |              |
| <b>Injuries</b>                                   | C      | 0.4055           | -0.1394           | 0.2661       | 0.5019       | 0.2358  |              |
| Transport injuries                                | C.1    | 0.1922           | -0.0352           | 0.1571       | 0.2104       | 0.0534  |              |
| Road injuries                                     | C.1.1  | 0.1823           | -0.0346           | 0.1478       | 0.1997       | 0.0520  |              |
| Other transport injuries                          | C.1.2  | 0.0099           | -0.0006           | 0.0093       | 0.0107       | 0.0014  |              |
| Unintentional injuries                            | C.2    | 0.1363           | -0.1060           | 0.0303       | 0.2063       | 0.1760  |              |
| Falls                                             | C.2.1  | 0.0149           | -0.0895           | -0.0746      | 0.0204       | 0.0950  |              |
| Drowning                                          | C.2.2  | 0.0428           | -0.0002           | 0.0426       | 0.0750       | 0.0324  |              |
| Fire, heat, and hot substances                    | C.2.3  | 0.0044           | -0.0036           | 0.0008       | 0.0060       | 0.0052  |              |
| Poisonings                                        | C.2.4  | 0.0131           | -0.0005           | 0.0127       | 0.0168       | 0.0042  |              |
| Exposure to mechanical forces                     | C.2.5  | 0.0226           | -0.0063           | 0.0163       | 0.0261       | 0.0098  |              |
| Adverse effects of medical treatment              | C.2.6  | 0.0020           | -0.0001           | 0.0019       | 0.0034       | 0.0015  |              |
| Animal contact                                    | C.2.7  | 0.0013           | -0.0009           | 0.0005       | 0.0018       | 0.0014  |              |
| Foreign body                                      | C.2.8  | 0.0014           | -0.0055           | -0.0041      | 0.0201       | 0.0242  |              |
| Environmental heat and cold exposure              | C.2.9  | 0.0010           | -0.0006           | 0.0004       | 0.0014       | 0.0010  |              |
| Exposure to forces of nature                      | C.2.10 | 0.0136           | 0.0010            | 0.0146       | 0.0147       | 0.0001  |              |
| Other unintentional injuries                      | C.2.11 | 0.0191           | 0.0001            | 0.0192       | 0.0205       | 0.0013  |              |
| Self-harm and interpersonal violence              | C.3    | 0.0770           | 0.0017            | 0.0787       | 0.0852       | 0.0065  |              |
| Self-harm                                         | C.3.1  | 0.0619           | 0.0010            | 0.0629       | 0.0691       | 0.0062  |              |
| Interpersonal violence                            | C.3.2  | 0.0152           | 0.0007            | 0.0159       | 0.0161       | 0.0002  |              |
| Conflict and terrorism                            | C.3.3  | 0.0000           | 0.0000            | 0.0000       | 0.0000       | 0.0000  |              |
| Executions and police conflict                    | C.3.4  | -0.0001          | 0.0000            | -0.0001      | -0.0001      | 0.0000  |              |

**Table S6a | Cause-specific effects of mortality and disability (years) on changes in life expectancy (LE) and health-adjusted life expectancy (HALE) for males from 1990 to 2019.**

| Causes                                                            | Level  | $\Delta$ HALE    |                   |              | $\Delta$ LE  | $\Delta$ LED |
|-------------------------------------------------------------------|--------|------------------|-------------------|--------------|--------------|--------------|
|                                                                   |        | Mortality Effect | Disability Effect | Total Effect | Total Effect |              |
| <b>Communicable, maternal, neonatal, and nutritional diseases</b> | A      | 1.0082           | 0.1694            | 1.1775       | 3.2198       | 2.0423       |
| HIV/AIDS and sexually transmitted infections                      | A.1    | -0.0738          | -0.0044           | -0.0782      | -0.0443      | 0.0339       |
| HIV/AIDS                                                          | A.1.1  | -0.0754          | -0.0047           | -0.0801      | -0.0503      | 0.0298       |
| Sexually transmitted infections excluding HIV                     | A.1.2  | 0.0016           | 0.0002            | 0.0019       | 0.0060       | 0.0041       |
| Respiratory infections and tuberculosis                           | A.2    | 0.7789           | 0.0492            | 0.8281       | 1.7113       | 0.8832       |
| Tuberculosis                                                      | A.2.1  | 0.4321           | 0.0387            | 0.4708       | 0.3796       | -0.0912      |
| Lower respiratory infections                                      | A.2.2  | 0.3185           | 0.0026            | 0.3211       | 1.3020       | 0.9809       |
| Upper respiratory infections                                      | A.2.3  | 0.0280           | 0.0001            | 0.0282       | 0.0293       | 0.0012       |
| Otitis media                                                      | A.2.4  | 0.0003           | 0.0077            | 0.0080       | 0.0003       | -0.0077      |
| Enteric infections                                                | A.3    | 0.0770           | 0.0000            | 0.0770       | 0.2701       | 0.1931       |
| Diarrheal diseases                                                | A.3.1  | 0.0689           | -0.0001           | 0.0688       | 0.2644       | 0.1955       |
| Typhoid and paratyphoid                                           | A.3.2  | 0.0064           | 0.0001            | 0.0065       | 0.0038       | -0.0027      |
| Invasive Non-typhoidal Salmonella (iNTS)                          | A.3.3  | 0.0013           | 0.0000            | 0.0013       | 0.0011       | -0.0003      |
| Other intestinal infectious diseases                              | A.3.4  | 0.0004           | 0.0000            | 0.0004       | 0.0008       | 0.0004       |
| Neglected tropical diseases and malaria                           | A.4    | 0.0146           | 0.0951            | 0.1097       | 0.0134       | -0.0963      |
| Malaria                                                           | A.4.1  | 0.0052           | 0.0005            | 0.0057       | 0.0036       | -0.0021      |
| Chagas disease                                                    | A.4.2  | 0.0000           | 0.0000            | 0.0000       | 0.0000       | 0.0000       |
| Leishmaniasis                                                     | A.4.3  | 0.0000           | 0.0000            | 0.0000       | 0.0000       | 0.0000       |
| African trypanosomiasis                                           | A.4.4  | 0.0000           | 0.0000            | 0.0000       | 0.0000       | 0.0000       |
| Schistosomiasis                                                   | A.4.5  | 0.0046           | 0.0030            | 0.0076       | 0.0037       | -0.0039      |
| Cysticercosis                                                     | A.4.6  | 0.0002           | 0.0047            | 0.0049       | 0.0001       | -0.0047      |
| Cystic echinococcosis                                             | A.4.7  | 0.0001           | 0.0000            | 0.0001       | 0.0001       | 0.0000       |
| Lymphatic filariasis                                              | A.4.8  | 0.0000           | 0.0000            | 0.0000       | 0.0000       | 0.0000       |
| Onchocerciasis                                                    | A.4.9  | 0.0000           | 0.0000            | 0.0000       | 0.0000       | 0.0000       |
| Trachoma                                                          | A.4.10 | 0.0000           | 0.0027            | 0.0027       | 0.0000       | -0.0027      |
| Dengue                                                            | A.4.11 | 0.0001           | -0.0022           | -0.0020      | 0.0002       | 0.0023       |
| Yellow fever                                                      | A.4.12 | 0.0000           | 0.0000            | 0.0000       | 0.0000       | 0.0000       |
| Rabies                                                            | A.4.13 | 0.0024           | 0.0000            | 0.0024       | 0.0026       | 0.0002       |
| Intestinal nematode infections                                    | A.4.14 | 0.0007           | 0.0364            | 0.0371       | 0.0013       | -0.0358      |
| Food-borne trematodiasis                                          | A.4.15 | 0.0000           | 0.0437            | 0.0437       | 0.0000       | -0.0437      |
| Leprosy                                                           | A.4.16 | 0.0000           | 0.0001            | 0.0001       | 0.0000       | -0.0001      |
| Ebola                                                             | A.4.17 | 0.0000           | 0.0000            | 0.0000       | 0.0000       | 0.0000       |
| Zika virus                                                        | A.4.18 | 0.0000           | 0.0000            | 0.0000       | 0.0000       | 0.0000       |
| Guinea worm disease                                               | A.4.19 | 0.0000           | 0.0000            | 0.0000       | 0.0000       | 0.0000       |
| Other neglected tropical diseases                                 | A.4.20 | 0.0013           | 0.0063            | 0.0076       | 0.0019       | -0.0057      |
| Other infectious diseases                                         | A.5    | 0.1824           | 0.0162            | 0.1987       | 0.4437       | 0.2450       |
| Meningitis                                                        | A.5.1  | 0.0410           | 0.0049            | 0.0459       | 0.1039       | 0.0580       |
| Encephalitis                                                      | A.5.2  | 0.0067           | 0.0031            | 0.0098       | 0.0183       | 0.0085       |
| Diphtheria                                                        | A.5.3  | 0.0003           | 0.0000            | 0.0003       | 0.0006       | 0.0003       |

| Causes                                  | Level    | $\Delta$ HALE    |                   |               | $\Delta$ LE   |                | $\Delta$ LED |
|-----------------------------------------|----------|------------------|-------------------|---------------|---------------|----------------|--------------|
|                                         |          | Mortality Effect | Disability Effect | Total Effect  | Total Effect  |                |              |
| Whooping cough                          | A.5.4    | 0.0137           | 0.0009            | 0.0145        | 0.0779        | 0.0634         |              |
| Tetanus                                 | A.5.5    | 0.0172           | 0.0001            | 0.0173        | 0.0671        | 0.0499         |              |
| Measles                                 | A.5.6    | 0.0240           | 0.0007            | 0.0246        | 0.0826        | 0.0579         |              |
| Varicella and herpes zoster             | A.5.7    | 0.0050           | 0.0000            | 0.0050        | 0.0055        | 0.0004         |              |
| Acute hepatitis                         | A.5.8    | 0.0634           | 0.0015            | 0.0649        | 0.0667        | 0.0019         |              |
| Other unspecified infectious diseases   | A.5.9    | 0.0112           | 0.0052            | 0.0164        | 0.0211        | 0.0047         |              |
| Maternal and neonatal disorders         | A.6      | 0.0086           | -0.0899           | -0.0812       | 0.7395        | 0.8207         |              |
| Maternal disorders                      | A.6.1    | 0.0000           | 0.0000            | 0.0000        | 0.0000        | 0.0000         |              |
| Neonatal disorders                      | A.6.2    | 0.0086           | -0.0899           | -0.0812       | 0.7395        | 0.8207         |              |
| Nutritional deficiencies                | A.7      | 0.0204           | 0.1031            | 0.1235        | 0.0861        | -0.0374        |              |
| Protein-energy malnutrition             | A.7.1    | 0.0219           | -0.0212           | 0.0007        | 0.0839        | 0.0832         |              |
| Iodine deficiency                       | A.7.2    | 0.0000           | 0.0051            | 0.0051        | 0.0000        | -0.0051        |              |
| Vitamin A deficiency                    | A.7.3    | 0.0000           | 0.0044            | 0.0044        | 0.0000        | -0.0044        |              |
| Dietary iron deficiency                 | A.7.4    | 0.0000           | 0.1194            | 0.1194        | 0.0000        | -0.1194        |              |
| Other nutritional deficiencies          | A.7.5    | -0.0015          | -0.0046           | -0.0062       | 0.0022        | 0.0084         |              |
| <b>Non-communicable diseases</b>        | <b>B</b> | <b>5.1347</b>    | <b>0.1102</b>     | <b>5.2449</b> | <b>4.5046</b> | <b>-0.7403</b> |              |
| Neoplasms                               | B.1      | 0.6692           | -0.0487           | 0.6205        | 0.7585        | 0.1380         |              |
| Lip and oral cavity cancer              | B.1.1    | -0.0112          | -0.0008           | -0.0120       | -0.0086       | 0.0035         |              |
| Nasopharynx cancer                      | B.1.2    | 0.0368           | -0.0028           | 0.0340        | 0.0298        | -0.0043        |              |
| Other pharynx cancer                    | B.1.3    | 0.0022           | -0.0001           | 0.0021        | 0.0015        | -0.0005        |              |
| Esophageal cancer                       | B.1.4    | 0.1510           | 0.0014            | 0.1525        | 0.1454        | -0.0070        |              |
| Stomach cancer                          | B.1.5    | 0.3101           | -0.0015           | 0.3086        | 0.2848        | -0.0238        |              |
| Colon and rectum cancer                 | B.1.6    | -0.1211          | -0.0154           | -0.1365       | -0.0802       | 0.0563         |              |
| Liver cancer                            | B.1.7    | 0.4475           | 0.0039            | 0.4515        | 0.3886        | -0.0628        |              |
| Gallbladder and biliary tract cancer    | B.1.8    | -0.0068          | -0.0002           | -0.0070       | -0.0046       | 0.0024         |              |
| Pancreatic cancer                       | B.1.9    | -0.0581          | -0.0007           | -0.0589       | -0.0428       | 0.0161         |              |
| Larynx cancer                           | B.1.10   | 0.0095           | -0.0009           | 0.0086        | 0.0086        | 0.0001         |              |
| Tracheal, bronchus, and lung cancer     | B.1.11   | -0.1445          | -0.0054           | -0.1499       | -0.0573       | 0.0926         |              |
| Malignant skin melanoma                 | B.1.12   | 0.0013           | -0.0003           | 0.0011        | 0.0011        | 0.0000         |              |
| Non-melanoma skin cancer                | B.1.13   | -0.0022          | -0.0002           | -0.0024       | -0.0009       | 0.0015         |              |
| Breast cancer                           | B.1.14   | -0.0032          | -0.0004           | -0.0037       | -0.0028       | 0.0008         |              |
| Cervical cancer                         | B.1.15   | 0.0000           | 0.0000            | 0.0000        | 0.0000        | 0.0000         |              |
| Uterine cancer                          | B.1.16   | 0.0000           | 0.0000            | 0.0000        | 0.0000        | 0.0000         |              |
| Ovarian cancer                          | B.1.17   | 0.0000           | 0.0000            | 0.0000        | 0.0000        | 0.0000         |              |
| Prostate cancer                         | B.1.18   | 0.0080           | -0.0078           | 0.0001        | 0.0084        | 0.0083         |              |
| Testicular cancer                       | B.1.19   | 0.0004           | -0.0007           | -0.0003       | 0.0004        | 0.0007         |              |
| Kidney cancer                           | B.1.20   | -0.0197          | -0.0014           | -0.0211       | -0.0132       | 0.0079         |              |
| Bladder cancer                          | B.1.21   | 0.0033           | -0.0029           | 0.0004        | 0.0032        | 0.0027         |              |
| Brain and central nervous system cancer | B.1.22   | 0.0080           | -0.0005           | 0.0075        | 0.0156        | 0.0082         |              |
| Thyroid cancer                          | B.1.23   | -0.0026          | -0.0005           | -0.0031       | -0.0014       | 0.0018         |              |
| Mesothelioma                            | B.1.24   | -0.0011          | 0.0000            | -0.0011       | -0.0009       | 0.0002         |              |
| Hodgkin lymphoma                        | B.1.25   | 0.0113           | -0.0002           | 0.0111        | 0.0085        | -0.0026        |              |

| Causes                                              | Level  | $\Delta$ HALE    |                   |              | $\Delta$ LE  |         | $\Delta$ LED |
|-----------------------------------------------------|--------|------------------|-------------------|--------------|--------------|---------|--------------|
|                                                     |        | Mortality Effect | Disability Effect | Total Effect | Total Effect |         |              |
| Non-Hodgkin lymphoma                                | B.1.26 | -0.0193          | -0.0037           | -0.0230      | -0.0130      | 0.0101  |              |
| Multiple myeloma                                    | B.1.27 | -0.0036          | -0.0004           | -0.0040      | -0.0021      | 0.0019  |              |
| Leukemia                                            | B.1.28 | 0.0628           | -0.0007           | 0.0621       | 0.0724       | 0.0103  |              |
| Other malignant neoplasms                           | B.1.29 | 0.0120           | -0.0047           | 0.0072       | 0.0186       | 0.0114  |              |
| Other neoplasms                                     | B.1.30 | -0.0017          | -0.0016           | -0.0033      | -0.0009      | 0.0024  |              |
| Cardiovascular diseases                             | B.2    | 1.2564           | -0.0493           | 1.2071       | 1.1889       | -0.0182 |              |
| Rheumatic heart disease                             | B.2.1  | 0.1820           | 0.0016            | 0.1836       | 0.1262       | -0.0574 |              |
| Ischemic heart disease                              | B.2.2  | -0.3899          | 0.0002            | -0.3897      | -0.0817      | 0.3080  |              |
| Stroke                                              | B.2.3  | 1.1494           | -0.0525           | 1.0968       | 0.9115       | -0.1853 |              |
| Hypertensive heart disease                          | B.2.4  | 0.2986           | 0.0055            | 0.3041       | 0.2000       | -0.1041 |              |
| Non-rheumatic valvular heart disease                | B.2.5  | 0.0036           | -0.0007           | 0.0028       | 0.0023       | -0.0006 |              |
| Cardiomyopathy and myocarditis                      | B.2.6  | -0.0013          | 0.0000            | -0.0013      | 0.0085       | 0.0098  |              |
| Atrial fibrillation and flutter                     | B.2.8  | -0.0047          | -0.0021           | -0.0068      | -0.0007      | 0.0061  |              |
| Aortic aneurysm                                     | B.2.9  | -0.0005          | 0.0000            | -0.0005      | 0.0004       | 0.0009  |              |
| Peripheral artery disease                           | B.2.10 | -0.0008          | 0.0008            | 0.0000       | -0.0004      | -0.0004 |              |
| Endocarditis                                        | B.2.11 | 0.0046           | 0.0000            | 0.0046       | 0.0063       | 0.0017  |              |
| Other cardiovascular and circulatory diseases       | B.2.12 | 0.0154           | -0.0021           | 0.0134       | 0.0164       | 0.0030  |              |
| Chronic respiratory diseases                        | B.3    | 2.4486           | 0.0845            | 2.5331       | 1.4886       | -1.0446 |              |
| Chronic obstructive pulmonary disease               | B.3.1  | 2.3353           | 0.0711            | 2.4064       | 1.4116       | -0.9948 |              |
| Pneumoconiosis                                      | B.3.2  | 0.0315           | 0.0033            | 0.0348       | 0.0235       | -0.0114 |              |
| Asthma                                              | B.3.3  | 0.0827           | 0.0121            | 0.0948       | 0.0524       | -0.0424 |              |
| Interstitial lung disease and pulmonary sarcoidosis | B.3.4  | -0.0003          | -0.0009           | -0.0012      | 0.0004       | 0.0017  |              |
| Other chronic respiratory diseases                  | B.3.5  | -0.0006          | -0.0011           | -0.0018      | 0.0006       | 0.0024  |              |
| Digestive diseases                                  | B.4    | 0.5565           | 0.0434            | 0.5998       | 0.4702       | -0.1296 |              |
| Cirrhosis and other chronic liver diseases          | B.4.1  | 0.2972           | 0.0033            | 0.3005       | 0.2428       | -0.0577 |              |
| Upper digestive system diseases                     | B.4.2  | 0.1493           | 0.0199            | 0.1692       | 0.1130       | -0.0561 |              |
| Appendicitis                                        | B.4.3  | 0.0091           | -0.0003           | 0.0088       | 0.0065       | -0.0023 |              |
| Paralytic ileus and intestinal obstruction          | B.4.4  | 0.0197           | -0.0003           | 0.0195       | 0.0379       | 0.0184  |              |
| Inguinal, femoral, and abdominal hernia             | B.4.5  | 0.0042           | 0.0024            | 0.0066       | 0.0085       | 0.0020  |              |
| Inflammatory bowel disease                          | B.4.6  | 0.0086           | -0.0031           | 0.0055       | 0.0060       | 0.0005  |              |
| Vascular intestinal disorders                       | B.4.7  | 0.0007           | 0.0000            | 0.0007       | 0.0007       | 0.0000  |              |
| Gallbladder and biliary diseases                    | B.4.8  | 0.0227           | 0.0202            | 0.0429       | 0.0164       | -0.0266 |              |
| Pancreatitis                                        | B.4.9  | 0.0106           | 0.0002            | 0.0108       | 0.0076       | -0.0032 |              |
| Other digestive diseases                            | B.4.10 | 0.0343           | 0.0011            | 0.0354       | 0.0308       | -0.0047 |              |
| Neurological disorders                              | B.5    | 0.0299           | -0.0596           | -0.0297      | 0.0389       | 0.0686  |              |
| Alzheimer's disease and other dementias             | B.5.1  | -0.0098          | -0.0265           | -0.0363      | -0.0018      | 0.0345  |              |
| Parkinson's disease                                 | B.5.2  | 0.0097           | -0.0085           | 0.0012       | 0.0086       | 0.0073  |              |
| Idiopathic epilepsy                                 | B.5.3  | 0.0304           | -0.0031           | 0.0273       | 0.0276       | 0.0003  |              |
| Multiple sclerosis                                  | B.5.4  | 0.0007           | -0.0001           | 0.0006       | 0.0006       | -0.0001 |              |
| Motor neuron disease                                | B.5.5  | 0.0009           | -0.0001           | 0.0008       | 0.0027       | 0.0019  |              |
| Headache disorders                                  | B.5.6  | 0.0000           | -0.0172           | -0.0172      | 0.0000       | 0.0172  |              |
| Other neurological disorders                        | B.5.7  | -0.0020          | -0.0042           | -0.0062      | 0.0013       | 0.0074  |              |

| Causes                                           | Level  | $\Delta$ HALE    |                   |              | $\Delta$ LE  |         | $\Delta$ LED |
|--------------------------------------------------|--------|------------------|-------------------|--------------|--------------|---------|--------------|
|                                                  |        | Mortality Effect | Disability Effect | Total Effect | Total Effect |         |              |
| Mental disorders                                 | B.6    | -0.0001          | 0.0155            | 0.0154       | -0.0001      | -0.0154 |              |
| Schizophrenia                                    | B.6.1  | 0.0000           | -0.0055           | -0.0055      | 0.0000       | 0.0055  |              |
| Depressive disorders                             | B.6.2  | 0.0000           | 0.0080            | 0.0080       | 0.0000       | -0.0080 |              |
| Bipolar disorder                                 | B.6.3  | 0.0000           | -0.0001           | -0.0001      | 0.0000       | 0.0001  |              |
| Anxiety disorders                                | B.6.4  | 0.0000           | 0.0157            | 0.0157       | 0.0000       | -0.0157 |              |
| Eating disorders                                 | B.6.5  | -0.0001          | -0.0059           | -0.0060      | -0.0001      | 0.0060  |              |
| Autism spectrum disorders                        | B.6.6  | 0.0000           | -0.0022           | -0.0022      | 0.0000       | 0.0022  |              |
| Attention-deficit/hyperactivity disorder         | B.6.7  | 0.0000           | -0.0011           | -0.0011      | 0.0000       | 0.0011  |              |
| Conduct disorder                                 | B.6.8  | 0.0000           | -0.0012           | -0.0012      | 0.0000       | 0.0012  |              |
| Idiopathic developmental intellectual disability | B.6.9  | 0.0000           | 0.0080            | 0.0080       | 0.0000       | -0.0080 |              |
| Other mental disorders                           | B.6.10 | 0.0000           | -0.0002           | -0.0002      | 0.0000       | 0.0002  |              |
| Substance use disorders                          | B.7    | 0.0443           | 0.0065            | 0.0508       | 0.0266       | -0.0242 |              |
| Alcohol use disorders                            | B.7.1  | -0.0167          | 0.0003            | -0.0164      | -0.0116      | 0.0049  |              |
| Drug use disorders                               | B.7.2  | 0.0610           | 0.0062            | 0.0672       | 0.0382       | -0.0290 |              |
| Diabetes and kidney diseases                     | B.8    | 0.0454           | -0.0766           | -0.0311      | 0.0540       | 0.0851  |              |
| Diabetes mellitus                                | B.8.1  | -0.0255          | -0.0713           | -0.0968      | -0.0062      | 0.0906  |              |
| Chronic kidney disease                           | B.8.2  | 0.0484           | -0.0053           | 0.0431       | 0.0434       | 0.0003  |              |
| Acute glomerulonephritis                         | B.8.3  | 0.0225           | 0.0000            | 0.0226       | 0.0168       | -0.0058 |              |
| Skin and subcutaneous diseases                   | B.9    | 0.0116           | -0.0046           | 0.0070       | 0.0093       | 0.0023  |              |
| Dermatitis                                       | B.9.1  | 0.0000           | -0.0003           | -0.0003      | 0.0000       | 0.0003  |              |
| Psoriasis                                        | B.9.2  | 0.0000           | 0.0106            | 0.0106       | 0.0000       | -0.0106 |              |
| Bacterial skin diseases                          | B.9.3  | 0.0129           | 0.0001            | 0.0130       | 0.0099       | -0.0031 |              |
| Scabies                                          | B.9.4  | 0.0000           | 0.0018            | 0.0018       | 0.0000       | -0.0018 |              |
| Fungal skin diseases                             | B.9.5  | 0.0000           | 0.0007            | 0.0007       | 0.0000       | -0.0007 |              |
| Viral skin diseases                              | B.9.6  | 0.0000           | -0.0001           | -0.0001      | 0.0000       | 0.0001  |              |
| Acne vulgaris                                    | B.9.7  | 0.0000           | -0.0118           | -0.0118      | 0.0000       | 0.0118  |              |
| Alopecia areata                                  | B.9.8  | 0.0000           | 0.0000            | 0.0000       | 0.0000       | 0.0000  |              |
| Pruritus                                         | B.9.9  | 0.0000           | -0.0008           | -0.0008      | 0.0000       | 0.0008  |              |
| Urticaria                                        | B.9.10 | 0.0000           | -0.0001           | -0.0001      | 0.0000       | 0.0001  |              |
| Decubitus ulcer                                  | B.9.11 | -0.0016          | -0.0002           | -0.0018      | -0.0007      | 0.0011  |              |
| Other skin and subcutaneous diseases             | B.9.12 | 0.0003           | -0.0045           | -0.0042      | 0.0001       | 0.0043  |              |
| Sense organ diseases                             | B.10   | 0.0000           | 0.0453            | 0.0453       | 0.0000       | -0.0453 |              |
| Blindness and vision loss                        | B.10.1 | 0.0000           | 0.0253            | 0.0253       | 0.0000       | -0.0253 |              |
| Age-related and other hearing loss               | B.10.2 | 0.0000           | 0.0214            | 0.0214       | 0.0000       | -0.0214 |              |
| Other sense organ diseases                       | B.10.3 | 0.0000           | -0.0014           | -0.0014      | 0.0000       | 0.0014  |              |
| Musculoskeletal disorders                        | B.11   | 0.0007           | 0.0794            | 0.0801       | 0.0014       | -0.0787 |              |
| Rheumatoid arthritis                             | B.11.1 | -0.0009          | -0.0009           | -0.0018      | 0.0001       | 0.0019  |              |
| Osteoarthritis                                   | B.11.2 | 0.0000           | -0.0168           | -0.0168      | 0.0000       | 0.0168  |              |
| Low back pain                                    | B.11.3 | 0.0000           | 0.1996            | 0.1996       | 0.0000       | -0.1996 |              |
| Neck pain                                        | B.11.4 | 0.0000           | -0.0047           | -0.0047      | 0.0000       | 0.0047  |              |
| Gout                                             | B.11.5 | 0.0000           | -0.0089           | -0.0089      | 0.0000       | 0.0089  |              |
| Other musculoskeletal disorders                  | B.11.6 | 0.0017           | -0.0890           | -0.0873      | 0.0014       | 0.0887  |              |

| Causes                                            | Level  | $\Delta$ HALE    |                   |              | $\Delta$ LE  |         | $\Delta$ LED |
|---------------------------------------------------|--------|------------------|-------------------|--------------|--------------|---------|--------------|
|                                                   |        | Mortality Effect | Disability Effect | Total Effect | Total Effect |         |              |
| Other non-communicable diseases                   | B.12   | 0.0721           | 0.0746            | 0.1467       | 0.4682       | 0.3215  |              |
| Congenital birth defects                          | B.12.1 | 0.0466           | 0.0090            | 0.0555       | 0.4260       | 0.3705  |              |
| Urinary diseases and male infertility             | B.12.2 | 0.0139           | 0.0119            | 0.0259       | 0.0106       | -0.0153 |              |
| Gynecological diseases                            | B.12.3 | 0.0000           | 0.0000            | 0.0000       | 0.0000       | 0.0000  |              |
| Hemoglobinopathies and hemolytic anemias          | B.12.4 | 0.0133           | 0.0388            | 0.0521       | 0.0188       | -0.0333 |              |
| Endocrine, metabolic, blood, and immune disorders | B.12.5 | -0.0017          | 0.0071            | 0.0054       | 0.0059       | 0.0005  |              |
| Oral disorders                                    | B.12.6 | 0.0000           | 0.0078            | 0.0078       | 0.0000       | -0.0078 |              |
| <b>Injuries</b>                                   | C      | 1.2773           | -0.0501           | 1.2273       | 1.1974       | -0.0299 |              |
| Transport injuries                                | C.1    | 0.2812           | -0.0653           | 0.2158       | 0.2398       | 0.0240  |              |
| Road injuries                                     | C.1.1  | 0.2350           | -0.0704           | 0.1647       | 0.2061       | 0.0415  |              |
| Other transport injuries                          | C.1.2  | 0.0461           | 0.0051            | 0.0512       | 0.0337       | -0.0175 |              |
| Unintentional injuries                            | C.2    | 0.4645           | 0.0062            | 0.4707       | 0.6221       | 0.1514  |              |
| Falls                                             | C.2.1  | -0.0044          | -0.0018           | -0.0062      | 0.0253       | 0.0315  |              |
| Drowning                                          | C.2.2  | 0.3015           | 0.0022            | 0.3038       | 0.3576       | 0.0538  |              |
| Fire, heat, and hot substances                    | C.2.3  | 0.0305           | 0.0006            | 0.0311       | 0.0348       | 0.0037  |              |
| Poisonings                                        | C.2.4  | 0.0104           | -0.0001           | 0.0102       | 0.0233       | 0.0130  |              |
| Exposure to mechanical forces                     | C.2.5  | 0.0474           | -0.0123           | 0.0351       | 0.0390       | 0.0039  |              |
| Adverse effects of medical treatment              | C.2.6  | 0.0169           | 0.0000            | 0.0169       | 0.0235       | 0.0065  |              |
| Animal contact                                    | C.2.7  | 0.0246           | 0.0031            | 0.0277       | 0.0230       | -0.0047 |              |
| Foreign body                                      | C.2.8  | 0.0014           | 0.0115            | 0.0129       | 0.0608       | 0.0479  |              |
| Environmental heat and cold exposure              | C.2.9  | 0.0317           | 0.0026            | 0.0342       | 0.0279       | -0.0063 |              |
| Exposure to forces of nature                      | C.2.10 | 0.0046           | -0.0018           | 0.0028       | 0.0030       | 0.0002  |              |
| Other unintentional injuries                      | C.2.11 | -0.0001          | 0.0021            | 0.0020       | 0.0038       | 0.0018  |              |
| Self-harm and interpersonal violence              | C.3    | 0.5316           | 0.0091            | 0.5407       | 0.3355       | -0.2053 |              |
| Self-harm                                         | C.3.1  | 0.3697           | 0.0022            | 0.3719       | 0.2309       | -0.1409 |              |
| Interpersonal violence                            | C.3.2  | 0.1376           | 0.0069            | 0.1445       | 0.0920       | -0.0525 |              |
| Conflict and terrorism                            | C.3.3  | 0.0001           | 0.0000            | 0.0002       | 0.0001       | -0.0001 |              |
| Executions and police conflict                    | C.3.4  | 0.0242           | 0.0000            | 0.0242       | 0.0125       | -0.0117 |              |



**Table S6b | Cause-specific effects of mortality and disability (years) on changes in life expectancy (LE) and health-adjusted life expectancy (HALE) for females from 1990 to 2019.**

| Causes                                                            | Level  | $\Delta$ HALE    |                   | $\Delta$ LE  |              | $\Delta$ LED |
|-------------------------------------------------------------------|--------|------------------|-------------------|--------------|--------------|--------------|
|                                                                   |        | Mortality Effect | Disability Effect | Total Effect | Total Effect |              |
| <b>Communicable, maternal, neonatal, and nutritional diseases</b> | A      | 1.2126           | 0.2983            | 1.5109       | 3.7428       | 2.2319       |
| HIV/AIDS and sexually transmitted infections                      | A.1    | -0.0218          | -0.0011           | -0.0228      | -0.0147      | 0.0081       |
| HIV/AIDS                                                          | A.1.1  | -0.0245          | -0.0018           | -0.0264      | -0.0226      | 0.0038       |
| Sexually transmitted infections excluding HIV                     | A.1.2  | 0.0028           | 0.0008            | 0.0035       | 0.0078       | 0.0043       |
| Respiratory infections and tuberculosis                           | A.2    | 0.8117           | 0.0369            | 0.8486       | 2.0374       | 1.1888       |
| Tuberculosis                                                      | A.2.1  | 0.2945           | 0.0269            | 0.3215       | 0.3572       | 0.0357       |
| Lower respiratory infections                                      | A.2.2  | 0.4748           | 0.0042            | 0.4790       | 1.6323       | 1.1533       |
| Upper respiratory infections                                      | A.2.3  | 0.0418           | -0.0011           | 0.0407       | 0.0473       | 0.0066       |
| Otitis media                                                      | A.2.4  | 0.0005           | 0.0069            | 0.0074       | 0.0006       | -0.0068      |
| Enteric infections                                                | A.3    | 0.0691           | 0.0012            | 0.0703       | 0.3067       | 0.2364       |
| Diarrheal diseases                                                | A.3.1  | 0.0616           | 0.0011            | 0.0627       | 0.3006       | 0.2379       |
| Typhoid and paratyphoid                                           | A.3.2  | 0.0055           | 0.0001            | 0.0056       | 0.0032       | -0.0024      |
| Invasive Non-typhoidal Salmonella (iNTS)                          | A.3.3  | 0.0014           | 0.0000            | 0.0014       | 0.0015       | 0.0000       |
| Other intestinal infectious diseases                              | A.3.4  | 0.0005           | 0.0000            | 0.0005       | 0.0014       | 0.0009       |
| Neglected tropical diseases and malaria                           | A.4    | 0.0129           | 0.1040            | 0.1169       | 0.0154       | -0.1014      |
| Malaria                                                           | A.4.1  | 0.0041           | 0.0009            | 0.0051       | 0.0042       | -0.0008      |
| Chagas disease                                                    | A.4.2  | 0.0000           | 0.0000            | 0.0000       | 0.0000       | 0.0000       |
| Leishmaniasis                                                     | A.4.3  | 0.0000           | 0.0000            | 0.0000       | 0.0000       | 0.0000       |
| African trypanosomiasis                                           | A.4.4  | 0.0000           | 0.0000            | 0.0000       | 0.0000       | 0.0000       |
| Schistosomiasis                                                   | A.4.5  | 0.0049           | 0.0058            | 0.0107       | 0.0053       | -0.0054      |
| Cysticercosis                                                     | A.4.6  | 0.0002           | 0.0074            | 0.0076       | 0.0002       | -0.0074      |
| Cystic echinococcosis                                             | A.4.7  | 0.0001           | 0.0000            | 0.0001       | 0.0001       | 0.0000       |
| Lymphatic filariasis                                              | A.4.8  | 0.0000           | 0.0000            | 0.0000       | 0.0000       | 0.0000       |
| Onchocerciasis                                                    | A.4.9  | 0.0000           | 0.0000            | 0.0000       | 0.0000       | 0.0000       |
| Trachoma                                                          | A.4.10 | 0.0000           | 0.0039            | 0.0039       | 0.0000       | -0.0039      |
| Dengue                                                            | A.4.11 | 0.0000           | -0.0023           | -0.0022      | 0.0001       | 0.0023       |
| Yellow fever                                                      | A.4.12 | 0.0000           | 0.0000            | 0.0000       | 0.0000       | 0.0000       |
| Rabies                                                            | A.4.13 | 0.0017           | 0.0000            | 0.0017       | 0.0021       | 0.0003       |
| Intestinal nematode infections                                    | A.4.14 | 0.0007           | 0.0459            | 0.0466       | 0.0014       | -0.0451      |
| Food-borne trematodiasis                                          | A.4.15 | 0.0000           | 0.0316            | 0.0316       | 0.0000       | -0.0316      |
| Leprosy                                                           | A.4.16 | 0.0000           | 0.0000            | 0.0000       | 0.0000       | 0.0000       |
| Ebola                                                             | A.4.17 | 0.0000           | 0.0000            | 0.0000       | 0.0000       | 0.0000       |
| Zika virus                                                        | A.4.18 | 0.0000           | 0.0000            | 0.0000       | 0.0000       | 0.0000       |
| Guinea worm disease                                               | A.4.19 | 0.0000           | 0.0000            | 0.0000       | 0.0000       | 0.0000       |
| Other neglected tropical diseases                                 | A.4.20 | 0.0010           | 0.0109            | 0.0118       | 0.0019       | -0.0099      |
| Other infectious diseases                                         | A.5    | 0.1594           | 0.0206            | 0.1800       | 0.4560       | 0.2760       |
| Meningitis                                                        | A.5.1  | 0.0387           | 0.0051            | 0.0438       | 0.0932       | 0.0494       |
| Encephalitis                                                      | A.5.2  | 0.0070           | 0.0031            | 0.0101       | 0.0213       | 0.0111       |
| Diphtheria                                                        | A.5.3  | 0.0003           | 0.0000            | 0.0003       | 0.0006       | 0.0004       |

| Causes                                  | Level    | $\Delta$ HALE    |                   |               | $\Delta$ LE   |               | $\Delta$ LED |
|-----------------------------------------|----------|------------------|-------------------|---------------|---------------|---------------|--------------|
|                                         |          | Mortality Effect | Disability Effect | Total Effect  | Total Effect  |               |              |
| Whooping cough                          | A.5.4    | 0.0209           | 0.0011            | 0.0220        | 0.1159        | 0.0939        |              |
| Tetanus                                 | A.5.5    | 0.0093           | 0.0000            | 0.0093        | 0.0461        | 0.0367        |              |
| Measles                                 | A.5.6    | 0.0332           | 0.0007            | 0.0339        | 0.1019        | 0.0679        |              |
| Varicella and herpes zoster             | A.5.7    | 0.0084           | 0.0000            | 0.0084        | 0.0085        | 0.0001        |              |
| Acute hepatitis                         | A.5.8    | 0.0358           | 0.0011            | 0.0369        | 0.0545        | 0.0176        |              |
| Other unspecified infectious diseases   | A.5.9    | 0.0058           | 0.0095            | 0.0153        | 0.0141        | -0.0012       |              |
| Maternal and neonatal disorders         | A.6      | 0.1296           | -0.0937           | 0.0359        | 0.7934        | 0.7575        |              |
| Maternal disorders                      | A.6.1    | 0.1217           | 0.0081            | 0.1298        | 0.0802        | -0.0496       |              |
| Neonatal disorders                      | A.6.2    | 0.0079           | -0.1018           | -0.0940       | 0.7132        | 0.8072        |              |
| Nutritional deficiencies                | A.7      | 0.0517           | 0.2304            | 0.2821        | 0.1486        | -0.1335       |              |
| Protein-energy malnutrition             | A.7.1    | 0.0523           | -0.0049           | 0.0475        | 0.1452        | 0.0977        |              |
| Iodine deficiency                       | A.7.2    | 0.0000           | 0.0003            | 0.0003        | 0.0000        | -0.0003       |              |
| Vitamin A deficiency                    | A.7.3    | 0.0000           | 0.0025            | 0.0025        | 0.0000        | -0.0025       |              |
| Dietary iron deficiency                 | A.7.4    | 0.0000           | 0.2319            | 0.2319        | 0.0000        | -0.2319       |              |
| Other nutritional deficiencies          | A.7.5    | -0.0006          | 0.0005            | -0.0001       | 0.0034        | 0.0035        |              |
| <b>Non-communicable diseases</b>        | <b>B</b> | <b>7.2870</b>    | <b>0.3589</b>     | <b>7.6459</b> | <b>7.6789</b> | <b>0.0330</b> |              |
| Neoplasms                               | B.1      | 0.7711           | -0.0334           | 0.7377        | 0.9586        | 0.2209        |              |
| Lip and oral cavity cancer              | B.1.1    | 0.0045           | -0.0001           | 0.0044        | 0.0047        | 0.0003        |              |
| Nasopharynx cancer                      | B.1.2    | 0.0312           | -0.0006           | 0.0306        | 0.0333        | 0.0027        |              |
| Other pharynx cancer                    | B.1.3    | 0.0015           | 0.0000            | 0.0015        | 0.0019        | 0.0004        |              |
| Esophageal cancer                       | B.1.4    | 0.1619           | 0.0020            | 0.1638        | 0.1986        | 0.0348        |              |
| Stomach cancer                          | B.1.5    | 0.2823           | 0.0021            | 0.2844        | 0.3283        | 0.0439        |              |
| Colon and rectum cancer                 | B.1.6    | -0.0075          | -0.0079           | -0.0155       | -0.0013       | 0.0142        |              |
| Liver cancer                            | B.1.7    | 0.2253           | 0.0027            | 0.2280        | 0.2629        | 0.0349        |              |
| Gallbladder and biliary tract cancer    | B.1.8    | 0.0007           | -0.0001           | 0.0006        | 0.0015        | 0.0010        |              |
| Pancreatic cancer                       | B.1.9    | -0.0363          | -0.0006           | -0.0369       | -0.0378       | -0.0009       |              |
| Larynx cancer                           | B.1.10   | 0.0057           | 0.0000            | 0.0057        | 0.0069        | 0.0011        |              |
| Tracheal, bronchus, and lung cancer     | B.1.11   | -0.0812          | -0.0031           | -0.0843       | -0.0644       | 0.0200        |              |
| Malignant skin melanoma                 | B.1.12   | 0.0010           | -0.0003           | 0.0007        | 0.0011        | 0.0005        |              |
| Non-melanoma skin cancer                | B.1.13   | -0.0038          | -0.0001           | -0.0039       | -0.0027       | 0.0013        |              |
| Breast cancer                           | B.1.14   | 0.0109           | -0.0145           | -0.0036       | 0.0141        | 0.0177        |              |
| Cervical cancer                         | B.1.15   | 0.0161           | -0.0016           | 0.0145        | 0.0179        | 0.0034        |              |
| Uterine cancer                          | B.1.16   | 0.0256           | -0.0011           | 0.0245        | 0.0305        | 0.0060        |              |
| Ovarian cancer                          | B.1.17   | -0.0178          | -0.0013           | -0.0191       | -0.0233       | -0.0041       |              |
| Prostate cancer                         | B.1.18   | 0.0000           | 0.0000            | 0.0000        | 0.0000        | 0.0000        |              |
| Testicular cancer                       | B.1.19   | 0.0000           | 0.0000            | 0.0000        | 0.0000        | 0.0000        |              |
| Kidney cancer                           | B.1.20   | -0.0034          | -0.0005           | -0.0039       | -0.0022       | 0.0017        |              |
| Bladder cancer                          | B.1.21   | 0.0122           | -0.0003           | 0.0119        | 0.0125        | 0.0006        |              |
| Brain and central nervous system cancer | B.1.22   | 0.0134           | -0.0011           | 0.0123        | 0.0180        | 0.0057        |              |
| Thyroid cancer                          | B.1.23   | 0.0048           | -0.0005           | 0.0043        | 0.0048        | 0.0006        |              |
| Mesothelioma                            | B.1.24   | 0.0008           | 0.0000            | 0.0008        | 0.0008        | 0.0001        |              |
| Hodgkin lymphoma                        | B.1.25   | 0.0080           | -0.0001           | 0.0079        | 0.0080        | 0.0001        |              |

| Causes                                              | Level  | $\Delta$ HALE    |                   |              | $\Delta$ LE  |         | $\Delta$ LED |
|-----------------------------------------------------|--------|------------------|-------------------|--------------|--------------|---------|--------------|
|                                                     |        | Mortality Effect | Disability Effect | Total Effect | Total Effect |         |              |
| Non-Hodgkin lymphoma                                | B.1.26 | 0.0018           | -0.0020           | -0.0003      | 0.0017       | 0.0020  |              |
| Multiple myeloma                                    | B.1.27 | 0.0014           | -0.0002           | 0.0012       | 0.0021       | 0.0009  |              |
| Leukemia                                            | B.1.28 | 0.0770           | -0.0001           | 0.0769       | 0.0966       | 0.0197  |              |
| Other malignant neoplasms                           | B.1.29 | 0.0355           | -0.0029           | 0.0326       | 0.0440       | 0.0114  |              |
| Other neoplasms                                     | B.1.30 | -0.0003          | -0.0010           | -0.0013      | -0.0001      | 0.0012  |              |
| Cardiovascular diseases                             | B.2    | 2.5295           | -0.1188           | 2.4108       | 2.7732       | 0.3625  |              |
| Rheumatic heart disease                             | B.2.1  | 0.3859           | 0.0009            | 0.3868       | 0.3922       | 0.0055  |              |
| Ischemic heart disease                              | B.2.2  | -0.2253          | -0.0089           | -0.2342      | 0.0083       | 0.2425  |              |
| Stroke                                              | B.2.3  | 1.8593           | -0.1042           | 1.7551       | 1.8880       | 0.1329  |              |
| Hypertensive heart disease                          | B.2.4  | 0.4619           | 0.0026            | 0.4644       | 0.4205       | -0.0439 |              |
| Non-rheumatic valvular heart disease                | B.2.5  | 0.0067           | -0.0015           | 0.0052       | 0.0056       | 0.0004  |              |
| Cardiomyopathy and myocarditis                      | B.2.6  | 0.0046           | 0.0000            | 0.0045       | 0.0146       | 0.0101  |              |
| Atrial fibrillation and flutter                     | B.2.8  | 0.0110           | -0.0066           | 0.0044       | 0.0104       | 0.0060  |              |
| Aortic aneurysm                                     | B.2.9  | 0.0028           | 0.0000            | 0.0028       | 0.0026       | -0.0002 |              |
| Peripheral artery disease                           | B.2.10 | 0.0000           | 0.0019            | 0.0019       | 0.0001       | -0.0018 |              |
| Endocarditis                                        | B.2.11 | 0.0038           | 0.0000            | 0.0038       | 0.0068       | 0.0030  |              |
| Other cardiovascular and circulatory diseases       | B.2.12 | 0.0189           | -0.0029           | 0.0160       | 0.0240       | 0.0080  |              |
| Chronic respiratory diseases                        | B.3    | 3.1692           | 0.1375            | 3.3067       | 2.6772       | -0.6295 |              |
| Chronic obstructive pulmonary disease               | B.3.1  | 3.0623           | 0.1237            | 3.1860       | 2.5817       | -0.6044 |              |
| Pneumoconiosis                                      | B.3.2  | 0.0021           | 0.0011            | 0.0032       | 0.0021       | -0.0011 |              |
| Asthma                                              | B.3.3  | 0.1030           | 0.0163            | 0.1193       | 0.0904       | -0.0288 |              |
| Interstitial lung disease and pulmonary sarcoidosis | B.3.4  | 0.0011           | -0.0008           | 0.0003       | 0.0015       | 0.0012  |              |
| Other chronic respiratory diseases                  | B.3.5  | 0.0007           | -0.0028           | -0.0021      | 0.0015       | 0.0037  |              |
| Digestive diseases                                  | B.4    | 0.4481           | 0.0536            | 0.5017       | 0.4979       | -0.0038 |              |
| Cirrhosis and other chronic liver diseases          | B.4.1  | 0.1892           | 0.0026            | 0.1918       | 0.2142       | 0.0224  |              |
| Upper digestive system diseases                     | B.4.2  | 0.1050           | 0.0204            | 0.1255       | 0.1034       | -0.0220 |              |
| Appendicitis                                        | B.4.3  | 0.0108           | -0.0002           | 0.0107       | 0.0095       | -0.0012 |              |
| Paralytic ileus and intestinal obstruction          | B.4.4  | 0.0225           | -0.0002           | 0.0223       | 0.0481       | 0.0257  |              |
| Inguinal, femoral, and abdominal hernia             | B.4.5  | 0.0017           | 0.0010            | 0.0027       | 0.0031       | 0.0004  |              |
| Inflammatory bowel disease                          | B.4.6  | 0.0127           | -0.0033           | 0.0094       | 0.0132       | 0.0038  |              |
| Vascular intestinal disorders                       | B.4.7  | 0.0026           | 0.0000            | 0.0026       | 0.0026       | 0.0000  |              |
| Gallbladder and biliary diseases                    | B.4.8  | 0.0489           | 0.0315            | 0.0803       | 0.0475       | -0.0328 |              |
| Pancreatitis                                        | B.4.9  | 0.0131           | 0.0003            | 0.0134       | 0.0132       | -0.0002 |              |
| Other digestive diseases                            | B.4.10 | 0.0416           | 0.0013            | 0.0429       | 0.0430       | 0.0001  |              |
| Neurological disorders                              | B.5    | 0.0703           | -0.1023           | -0.0320      | 0.0718       | 0.1038  |              |
| Alzheimer's disease and other dementias             | B.5.1  | 0.0139           | -0.0599           | -0.0460      | 0.0119       | 0.0579  |              |
| Parkinson's disease                                 | B.5.2  | 0.0268           | -0.0056           | 0.0211       | 0.0258       | 0.0047  |              |
| Idiopathic epilepsy                                 | B.5.3  | 0.0271           | -0.0029           | 0.0242       | 0.0274       | 0.0033  |              |
| Multiple sclerosis                                  | B.5.4  | 0.0012           | -0.0002           | 0.0010       | 0.0013       | 0.0002  |              |
| Motor neuron disease                                | B.5.5  | 0.0011           | -0.0001           | 0.0010       | 0.0037       | 0.0027  |              |
| Headache disorders                                  | B.5.6  | 0.0000           | -0.0294           | -0.0294      | 0.0000       | 0.0294  |              |
| Other neurological disorders                        | B.5.7  | 0.0003           | -0.0043           | -0.0040      | 0.0017       | 0.0057  |              |

| Causes                                           | Level  | $\Delta$ HALE    |                   |              | $\Delta$ LE  |         | $\Delta$ LED |
|--------------------------------------------------|--------|------------------|-------------------|--------------|--------------|---------|--------------|
|                                                  |        | Mortality Effect | Disability Effect | Total Effect | Total Effect |         |              |
| Mental disorders                                 | B.6    | -0.0001          | 0.0581            | 0.0580       | -0.0001      | -0.0581 |              |
| Schizophrenia                                    | B.6.1  | 0.0000           | -0.0063           | -0.0063      | 0.0000       | 0.0063  |              |
| Depressive disorders                             | B.6.2  | 0.0000           | 0.0317            | 0.0317       | 0.0000       | -0.0317 |              |
| Bipolar disorder                                 | B.6.3  | 0.0000           | 0.0000            | 0.0000       | 0.0000       | 0.0000  |              |
| Anxiety disorders                                | B.6.4  | 0.0000           | 0.0345            | 0.0345       | 0.0000       | -0.0345 |              |
| Eating disorders                                 | B.6.5  | -0.0001          | -0.0070           | -0.0071      | -0.0001      | 0.0071  |              |
| Autism spectrum disorders                        | B.6.6  | 0.0000           | -0.0005           | -0.0005      | 0.0000       | 0.0005  |              |
| Attention-deficit/hyperactivity disorder         | B.6.7  | 0.0000           | -0.0006           | -0.0006      | 0.0000       | 0.0006  |              |
| Conduct disorder                                 | B.6.8  | 0.0000           | -0.0006           | -0.0006      | 0.0000       | 0.0006  |              |
| Idiopathic developmental intellectual disability | B.6.9  | 0.0000           | 0.0074            | 0.0074       | 0.0000       | -0.0074 |              |
| Other mental disorders                           | B.6.10 | 0.0000           | -0.0005           | -0.0005      | 0.0000       | 0.0005  |              |
| Substance use disorders                          | B.7    | 0.0749           | 0.0035            | 0.0784       | 0.0606       | -0.0177 |              |
| Alcohol use disorders                            | B.7.1  | 0.0092           | -0.0029           | 0.0063       | 0.0083       | 0.0020  |              |
| Drug use disorders                               | B.7.2  | 0.0657           | 0.0064            | 0.0721       | 0.0524       | -0.0197 |              |
| Diabetes and kidney diseases                     | B.8    | 0.1158           | -0.0372           | 0.0786       | 0.1445       | 0.0659  |              |
| Diabetes mellitus                                | B.8.1  | 0.0244           | -0.0299           | -0.0055      | 0.0454       | 0.0510  |              |
| Chronic kidney disease                           | B.8.2  | 0.0714           | -0.0073           | 0.0641       | 0.0786       | 0.0146  |              |
| Acute glomerulonephritis                         | B.8.3  | 0.0200           | 0.0000            | 0.0201       | 0.0204       | 0.0004  |              |
| Skin and subcutaneous diseases                   | B.9    | 0.0163           | -0.0129           | 0.0033       | 0.0137       | 0.0103  |              |
| Dermatitis                                       | B.9.1  | 0.0000           | -0.0016           | -0.0016      | 0.0000       | 0.0016  |              |
| Psoriasis                                        | B.9.2  | 0.0000           | 0.0102            | 0.0102       | 0.0000       | -0.0102 |              |
| Bacterial skin diseases                          | B.9.3  | 0.0174           | 0.0001            | 0.0175       | 0.0142       | -0.0033 |              |
| Scabies                                          | B.9.4  | 0.0000           | 0.0013            | 0.0013       | 0.0000       | -0.0013 |              |
| Fungal skin diseases                             | B.9.5  | 0.0000           | 0.0006            | 0.0006       | 0.0000       | -0.0006 |              |
| Viral skin diseases                              | B.9.6  | 0.0000           | -0.0001           | -0.0001      | 0.0000       | 0.0001  |              |
| Acne vulgaris                                    | B.9.7  | 0.0000           | -0.0172           | -0.0172      | 0.0000       | 0.0172  |              |
| Alopecia areata                                  | B.9.8  | 0.0000           | 0.0000            | 0.0000       | 0.0000       | 0.0000  |              |
| Pruritus                                         | B.9.9  | 0.0000           | -0.0011           | -0.0011      | 0.0000       | 0.0011  |              |
| Urticaria                                        | B.9.10 | 0.0000           | -0.0002           | -0.0002      | 0.0000       | 0.0002  |              |
| Decubitus ulcer                                  | B.9.11 | -0.0014          | -0.0003           | -0.0018      | -0.0007      | 0.0011  |              |
| Other skin and subcutaneous diseases             | B.9.12 | 0.0003           | -0.0045           | -0.0042      | 0.0002       | 0.0044  |              |
| Sense organ diseases                             | B.10   | 0.0000           | 0.0531            | 0.0531       | 0.0000       | -0.0531 |              |
| Blindness and vision loss                        | B.10.1 | 0.0000           | 0.0366            | 0.0366       | 0.0000       | -0.0366 |              |
| Age-related and other hearing loss               | B.10.2 | 0.0000           | 0.0189            | 0.0189       | 0.0000       | -0.0189 |              |
| Other sense organ diseases                       | B.10.3 | 0.0000           | -0.0025           | -0.0025      | 0.0000       | 0.0025  |              |
| Musculoskeletal disorders                        | B.11   | -0.0079          | 0.1428            | 0.1350       | -0.0050      | -0.1400 |              |
| Rheumatoid arthritis                             | B.11.1 | 0.0005           | -0.0020           | -0.0015      | 0.0013       | 0.0028  |              |
| Osteoarthritis                                   | B.11.2 | 0.0000           | -0.0271           | -0.0271      | 0.0000       | 0.0271  |              |
| Low back pain                                    | B.11.3 | 0.0000           | 0.2812            | 0.2812       | 0.0000       | -0.2812 |              |
| Neck pain                                        | B.11.4 | 0.0000           | -0.0130           | -0.0130      | 0.0000       | 0.0130  |              |
| Gout                                             | B.11.5 | 0.0000           | -0.0040           | -0.0040      | 0.0000       | 0.0040  |              |
| Other musculoskeletal disorders                  | B.11.6 | -0.0084          | -0.0924           | -0.1007      | -0.0063      | 0.0944  |              |

| Causes                                            | Level  | $\Delta$ HALE    |                   |              | $\Delta$ LE  |         | $\Delta$ LED |
|---------------------------------------------------|--------|------------------|-------------------|--------------|--------------|---------|--------------|
|                                                   |        | Mortality Effect | Disability Effect | Total Effect | Total Effect |         |              |
| Other non-communicable diseases                   | B.12   | 0.0998           | 0.2149            | 0.3147       | 0.4865       | 0.1717  |              |
| Congenital birth defects                          | B.12.1 | 0.0535           | 0.0066            | 0.0601       | 0.4178       | 0.3578  |              |
| Urinary diseases and male infertility             | B.12.2 | 0.0203           | 0.0010            | 0.0213       | 0.0188       | -0.0025 |              |
| Gynecological diseases                            | B.12.3 | -0.0008          | 0.1071            | 0.1063       | -0.0008      | -0.1071 |              |
| Hemoglobinopathies and hemolytic anemias          | B.12.4 | 0.0174           | 0.0781            | 0.0955       | 0.0242       | -0.0713 |              |
| Endocrine, metabolic, blood, and immune disorders | B.12.5 | 0.0093           | 0.0141            | 0.0234       | 0.0161       | -0.0073 |              |
| Oral disorders                                    | B.12.6 | 0.0000           | 0.0081            | 0.0081       | 0.0000       | -0.0081 |              |
| <b>Injuries</b>                                   | C      | 1.0332           | -0.0589           | 0.9743       | 1.2129       | 0.2386  |              |
| Transport injuries                                | C.1    | 0.1388           | -0.0472           | 0.0915       | 0.1666       | 0.0750  |              |
| Road injuries                                     | C.1.1  | 0.1201           | -0.0496           | 0.0705       | 0.1463       | 0.0758  |              |
| Other transport injuries                          | C.1.2  | 0.0187           | 0.0023            | 0.0211       | 0.0202       | -0.0008 |              |
| Unintentional injuries                            | C.2    | 0.2472           | -0.0235           | 0.2237       | 0.5114       | 0.2878  |              |
| Falls                                             | C.2.1  | -0.0176          | -0.0287           | -0.0463      | 0.0173       | 0.0636  |              |
| Drowning                                          | C.2.2  | 0.1806           | -0.0003           | 0.1804       | 0.2780       | 0.0976  |              |
| Fire, heat, and hot substances                    | C.2.3  | 0.0200           | -0.0016           | 0.0184       | 0.0283       | 0.0099  |              |
| Poisonings                                        | C.2.4  | 0.0023           | 0.0001            | 0.0024       | 0.0145       | 0.0122  |              |
| Exposure to mechanical forces                     | C.2.5  | 0.0060           | -0.0069           | -0.0009      | 0.0118       | 0.0127  |              |
| Adverse effects of medical treatment              | C.2.6  | 0.0211           | 0.0000            | 0.0211       | 0.0328       | 0.0117  |              |
| Animal contact                                    | C.2.7  | 0.0094           | 0.0027            | 0.0121       | 0.0120       | -0.0001 |              |
| Foreign body                                      | C.2.8  | 0.0062           | 0.0079            | 0.0141       | 0.0909       | 0.0768  |              |
| Environmental heat and cold exposure              | C.2.9  | 0.0104           | 0.0015            | 0.0119       | 0.0144       | 0.0025  |              |
| Exposure to forces of nature                      | C.2.10 | 0.0028           | -0.0012           | 0.0016       | 0.0023       | 0.0008  |              |
| Other unintentional injuries                      | C.2.11 | 0.0062           | 0.0028            | 0.0090       | 0.0091       | 0.0001  |              |
| Self-harm and interpersonal violence              | C.3    | 0.6472           | 0.0119            | 0.6591       | 0.5349       | -0.1242 |              |
| Self-harm                                         | C.3.1  | 0.5954           | 0.0096            | 0.6049       | 0.4753       | -0.1296 |              |
| Interpersonal violence                            | C.3.2  | 0.0514           | 0.0023            | 0.0537       | 0.0591       | 0.0053  |              |
| Conflict and terrorism                            | C.3.3  | 0.0000           | 0.0000            | 0.0001       | 0.0000       | 0.0000  |              |
| Executions and police conflict                    | C.3.4  | 0.0004           | 0.0000            | 0.0004       | 0.0005       | 0.0001  |              |

**Table S7a | Cause-specific effects of mortality and disability (years) on changes in life expectancy (LE) and health-adjusted life expectancy (HALE) for those aged <14 years from 1990 to 2019.**

| Causes                                                            | Level  | $\Delta$ HALE    |                   |              | $\Delta$ LE  | $\Delta$ LED |
|-------------------------------------------------------------------|--------|------------------|-------------------|--------------|--------------|--------------|
|                                                                   |        | Mortality Effect | Disability Effect | Total Effect | Total Effect |              |
| <b>Communicable, maternal, neonatal, and nutritional diseases</b> | A      | 0.2237           | 0.0417            | 0.2654       | 2.8015       | 2.5360       |
| HIV/AIDS and sexually transmitted infections                      | A.1    | -0.0012          | 0.0000            | -0.0013      | 0.0031       | 0.0044       |
| HIV/AIDS                                                          | A.1.1  | -0.0014          | 0.0000            | -0.0014      | -0.0019      | -0.0005      |
| Sexually transmitted infections excluding HIV                     | A.1.2  | 0.0002           | 0.0000            | 0.0002       | 0.0050       | 0.0049       |
| Respiratory infections and tuberculosis                           | A.2    | 0.1087           | 0.0048            | 0.1135       | 1.3392       | 1.2257       |
| Tuberculosis                                                      | A.2.1  | 0.0160           | 0.0025            | 0.0185       | 0.0724       | 0.0538       |
| Lower respiratory infections                                      | A.2.2  | 0.0894           | 0.0012            | 0.0906       | 1.2471       | 1.1565       |
| Upper respiratory infections                                      | A.2.3  | 0.0032           | -0.0002           | 0.0030       | 0.0196       | 0.0166       |
| Otitis media                                                      | A.2.4  | 0.0001           | 0.0012            | 0.0013       | 0.0001       | -0.0012      |
| Enteric infections                                                | A.3    | 0.0267           | 0.0009            | 0.0276       | 0.2552       | 0.2276       |
| Diarrheal diseases                                                | A.3.1  | 0.0231           | 0.0009            | 0.0240       | 0.2519       | 0.2279       |
| Typhoid and paratyphoid                                           | A.3.2  | 0.0028           | 0.0000            | 0.0028       | 0.0017       | -0.0011      |
| Invasive Non-typhoidal Salmonella (iNTS)                          | A.3.3  | 0.0005           | 0.0000            | 0.0005       | 0.0006       | 0.0001       |
| Other intestinal infectious diseases                              | A.3.4  | 0.0003           | 0.0000            | 0.0003       | 0.0010       | 0.0007       |
| Neglected tropical diseases and malaria                           | A.4    | 0.0030           | 0.0147            | 0.0178       | 0.0056       | -0.0122      |
| Malaria                                                           | A.4.1  | 0.0009           | 0.0002            | 0.0011       | 0.0014       | 0.0003       |
| Chagas disease                                                    | A.4.2  | 0.0000           | 0.0000            | 0.0000       | 0.0000       | 0.0000       |
| Leishmaniasis                                                     | A.4.3  | 0.0000           | 0.0000            | 0.0000       | 0.0000       | 0.0000       |
| African trypanosomiasis                                           | A.4.4  | 0.0000           | 0.0000            | 0.0000       | 0.0000       | 0.0000       |
| Schistosomiasis                                                   | A.4.5  | 0.0001           | 0.0003            | 0.0005       | 0.0001       | -0.0004      |
| Cysticercosis                                                     | A.4.6  | 0.0000           | 0.0000            | 0.0000       | 0.0000       | 0.0000       |
| Cystic echinococcosis                                             | A.4.7  | 0.0000           | 0.0000            | 0.0000       | 0.0000       | 0.0000       |
| Lymphatic filariasis                                              | A.4.8  | 0.0000           | 0.0000            | 0.0000       | 0.0000       | 0.0000       |
| Onchocerciasis                                                    | A.4.9  | 0.0000           | 0.0000            | 0.0000       | 0.0000       | 0.0000       |
| Trachoma                                                          | A.4.10 | 0.0000           | 0.0000            | 0.0000       | 0.0000       | 0.0000       |
| Dengue                                                            | A.4.11 | 0.0000           | -0.0004           | -0.0004      | 0.0001       | 0.0005       |
| Yellow fever                                                      | A.4.12 | 0.0000           | 0.0000            | 0.0000       | 0.0000       | 0.0000       |
| Rabies                                                            | A.4.13 | 0.0011           | 0.0000            | 0.0011       | 0.0016       | 0.0004       |
| Intestinal nematode infections                                    | A.4.14 | 0.0005           | 0.0097            | 0.0102       | 0.0012       | -0.0090      |
| Food-borne trematodiasis                                          | A.4.15 | 0.0000           | 0.0016            | 0.0016       | 0.0000       | -0.0016      |
| Leprosy                                                           | A.4.16 | 0.0000           | 0.0000            | 0.0000       | 0.0000       | 0.0000       |
| Ebola                                                             | A.4.17 | 0.0000           | 0.0000            | 0.0000       | 0.0000       | 0.0000       |
| Zika virus                                                        | A.4.18 | 0.0000           | 0.0000            | 0.0000       | 0.0000       | 0.0000       |
| Guinea worm disease                                               | A.4.19 | 0.0000           | 0.0000            | 0.0000       | 0.0000       | 0.0000       |
| Other neglected tropical diseases                                 | A.4.20 | 0.0002           | 0.0034            | 0.0037       | 0.0011       | -0.0025      |
| Other infectious diseases                                         | A.5    | 0.0712           | 0.0059            | 0.0771       | 0.3741       | 0.2969       |
| Meningitis                                                        | A.5.1  | 0.0184           | 0.0012            | 0.0196       | 0.0843       | 0.0647       |
| Encephalitis                                                      | A.5.2  | 0.0040           | 0.0005            | 0.0046       | 0.0176       | 0.0131       |
| Diphtheria                                                        | A.5.3  | 0.0002           | 0.0000            | 0.0002       | 0.0005       | 0.0003       |

| Causes                                  | Level    | $\Delta$ HALE    |                   |               | $\Delta$ LE   |               | $\Delta$ LED |
|-----------------------------------------|----------|------------------|-------------------|---------------|---------------|---------------|--------------|
|                                         |          | Mortality Effect | Disability Effect | Total Effect  | Total Effect  |               |              |
| Whooping cough                          | A.5.4    | 0.0149           | 0.0010            | 0.0159        | 0.0939        | 0.0779        |              |
| Tetanus                                 | A.5.5    | 0.0021           | 0.0000            | 0.0022        | 0.0487        | 0.0465        |              |
| Measles                                 | A.5.6    | 0.0247           | 0.0007            | 0.0253        | 0.0896        | 0.0643        |              |
| Varicella and herpes zoster             | A.5.7    | 0.0015           | 0.0000            | 0.0015        | 0.0041        | 0.0025        |              |
| Acute hepatitis                         | A.5.8    | 0.0030           | 0.0004            | 0.0034        | 0.0219        | 0.0185        |              |
| Other unspecified infectious diseases   | A.5.9    | 0.0023           | 0.0022            | 0.0045        | 0.0135        | 0.0090        |              |
| Maternal and neonatal disorders         | A.6      | 0.0087           | -0.0233           | -0.0147       | 0.7281        | 0.7427        |              |
| Maternal disorders                      | A.6.1    | 0.0004           | 0.0000            | 0.0004        | 0.0002        | -0.0002       |              |
| Neonatal disorders                      | A.6.2    | 0.0083           | -0.0234           | -0.0151       | 0.7279        | 0.7429        |              |
| Nutritional deficiencies                | A.7      | 0.0066           | 0.0387            | 0.0453        | 0.0962        | 0.0509        |              |
| Protein-energy malnutrition             | A.7.1    | 0.0064           | -0.0006           | 0.0058        | 0.0932        | 0.0873        |              |
| Iodine deficiency                       | A.7.2    | 0.0000           | 0.0007            | 0.0007        | 0.0000        | -0.0007       |              |
| Vitamin A deficiency                    | A.7.3    | 0.0000           | 0.0035            | 0.0035        | 0.0000        | -0.0035       |              |
| Dietary iron deficiency                 | A.7.4    | 0.0000           | 0.0353            | 0.0353        | 0.0000        | -0.0353       |              |
| Other nutritional deficiencies          | A.7.5    | 0.0002           | -0.0002           | 0.0000        | 0.0030        | 0.0030        |              |
| <b>Non-communicable diseases</b>        | <b>B</b> | <b>0.1495</b>    | <b>0.0093</b>     | <b>0.1588</b> | <b>0.6919</b> | <b>0.5331</b> |              |
| Neoplasms                               | B.1      | 0.0471           | 0.0006            | 0.0477        | 0.0844        | 0.0366        |              |
| Lip and oral cavity cancer              | B.1.1    | 0.0000           | 0.0000            | 0.0000        | 0.0000        | 0.0000        |              |
| Nasopharynx cancer                      | B.1.2    | 0.0011           | 0.0000            | 0.0011        | 0.0007        | -0.0005       |              |
| Other pharynx cancer                    | B.1.3    | 0.0000           | 0.0000            | 0.0000        | 0.0000        | 0.0000        |              |
| Esophageal cancer                       | B.1.4    | 0.0000           | 0.0000            | 0.0000        | 0.0000        | 0.0000        |              |
| Stomach cancer                          | B.1.5    | 0.0000           | 0.0000            | 0.0000        | 0.0000        | 0.0000        |              |
| Colon and rectum cancer                 | B.1.6    | 0.0003           | 0.0000            | 0.0003        | 0.0002        | -0.0001       |              |
| Liver cancer                            | B.1.7    | 0.0025           | 0.0000            | 0.0026        | 0.0042        | 0.0017        |              |
| Gallbladder and biliary tract cancer    | B.1.8    | 0.0000           | 0.0000            | 0.0000        | 0.0000        | 0.0000        |              |
| Pancreatic cancer                       | B.1.9    | 0.0000           | 0.0000            | 0.0000        | 0.0000        | 0.0000        |              |
| Larynx cancer                           | B.1.10   | 0.0000           | 0.0000            | 0.0000        | 0.0000        | 0.0000        |              |
| Tracheal, bronchus, and lung cancer     | B.1.11   | 0.0002           | 0.0000            | 0.0002        | 0.0001        | -0.0001       |              |
| Malignant skin melanoma                 | B.1.12   | 0.0000           | 0.0000            | 0.0000        | 0.0000        | 0.0000        |              |
| Non-melanoma skin cancer                | B.1.13   | 0.0000           | 0.0000            | 0.0000        | 0.0000        | 0.0000        |              |
| Breast cancer                           | B.1.14   | 0.0000           | 0.0000            | 0.0000        | 0.0000        | 0.0000        |              |
| Cervical cancer                         | B.1.15   | 0.0000           | 0.0000            | 0.0000        | 0.0000        | 0.0000        |              |
| Uterine cancer                          | B.1.16   | 0.0000           | 0.0000            | 0.0000        | 0.0000        | 0.0000        |              |
| Ovarian cancer                          | B.1.17   | 0.0001           | 0.0000            | 0.0001        | 0.0001        | 0.0000        |              |
| Prostate cancer                         | B.1.18   | 0.0000           | 0.0000            | 0.0000        | 0.0000        | 0.0000        |              |
| Testicular cancer                       | B.1.19   | 0.0000           | -0.0001           | 0.0000        | 0.0001        | 0.0001        |              |
| Kidney cancer                           | B.1.20   | 0.0001           | 0.0000            | 0.0001        | 0.0008        | 0.0008        |              |
| Bladder cancer                          | B.1.21   | 0.0000           | 0.0000            | 0.0000        | 0.0000        | 0.0000        |              |
| Brain and central nervous system cancer | B.1.22   | 0.0071           | -0.0001           | 0.0070        | 0.0120        | 0.0049        |              |
| Thyroid cancer                          | B.1.23   | 0.0001           | 0.0000            | 0.0001        | 0.0001        | 0.0000        |              |
| Mesothelioma                            | B.1.24   | 0.0000           | 0.0000            | 0.0000        | 0.0000        | 0.0000        |              |
| Hodgkin lymphoma                        | B.1.25   | 0.0011           | 0.0000            | 0.0011        | 0.0012        | 0.0001        |              |

| Causes                                              | Level  | $\Delta$ HALE    |                   |              | $\Delta$ LE  |         | $\Delta$ LED |
|-----------------------------------------------------|--------|------------------|-------------------|--------------|--------------|---------|--------------|
|                                                     |        | Mortality Effect | Disability Effect | Total Effect | Total Effect |         |              |
| Non-Hodgkin lymphoma                                | B.1.26 | 0.0020           | 0.0000            | 0.0020       | 0.0028       | 0.0009  |              |
| Multiple myeloma                                    | B.1.27 | 0.0000           | 0.0000            | 0.0000       | 0.0000       | 0.0000  |              |
| Leukemia                                            | B.1.28 | 0.0262           | 0.0010            | 0.0272       | 0.0494       | 0.0222  |              |
| Other malignant neoplasms                           | B.1.29 | 0.0062           | -0.0002           | 0.0059       | 0.0126       | 0.0066  |              |
| Other neoplasms                                     | B.1.30 | 0.0000           | 0.0000            | 0.0001       | 0.0002       | 0.0001  |              |
| Cardiovascular diseases                             | B.2    | 0.0185           | 0.0002            | 0.0187       | 0.0594       | 0.0406  |              |
| Rheumatic heart disease                             | B.2.1  | 0.0050           | 0.0003            | 0.0053       | 0.0060       | 0.0008  |              |
| Ischemic heart disease                              | B.2.2  | 0.0000           | 0.0000            | 0.0000       | 0.0000       | 0.0000  |              |
| Stroke                                              | B.2.3  | 0.0086           | 0.0002            | 0.0088       | 0.0327       | 0.0239  |              |
| Hypertensive heart disease                          | B.2.4  | 0.0000           | 0.0000            | 0.0000       | 0.0000       | 0.0000  |              |
| Non-rheumatic valvular heart disease                | B.2.5  | 0.0000           | 0.0000            | 0.0000       | 0.0000       | 0.0000  |              |
| Cardiomyopathy and myocarditis                      | B.2.6  | 0.0014           | 0.0000            | 0.0014       | 0.0086       | 0.0072  |              |
| Atrial fibrillation and flutter                     | B.2.8  | 0.0000           | 0.0000            | 0.0000       | 0.0000       | 0.0000  |              |
| Aortic aneurysm                                     | B.2.9  | 0.0000           | 0.0000            | 0.0000       | 0.0000       | 0.0000  |              |
| Peripheral artery disease                           | B.2.10 | 0.0000           | 0.0000            | 0.0000       | 0.0000       | 0.0000  |              |
| Endocarditis                                        | B.2.11 | 0.0007           | 0.0000            | 0.0007       | 0.0041       | 0.0034  |              |
| Other cardiovascular and circulatory diseases       | B.2.12 | 0.0028           | -0.0003           | 0.0026       | 0.0080       | 0.0054  |              |
| Chronic respiratory diseases                        | B.3    | 0.0066           | -0.0004           | 0.0062       | 0.0095       | 0.0032  |              |
| Chronic obstructive pulmonary disease               | B.3.1  | 0.0032           | 0.0004            | 0.0037       | 0.0041       | 0.0005  |              |
| Pneumoconiosis                                      | B.3.2  | 0.0000           | 0.0000            | 0.0000       | 0.0000       | 0.0000  |              |
| Asthma                                              | B.3.3  | 0.0026           | 0.0001            | 0.0027       | 0.0039       | 0.0011  |              |
| Interstitial lung disease and pulmonary sarcoidosis | B.3.4  | 0.0002           | 0.0000            | 0.0002       | 0.0002       | 0.0001  |              |
| Other chronic respiratory diseases                  | B.3.5  | 0.0006           | -0.0009           | -0.0003      | 0.0012       | 0.0016  |              |
| Digestive diseases                                  | B.4    | 0.0150           | 0.0018            | 0.0168       | 0.0567       | 0.0399  |              |
| Cirrhosis and other chronic liver diseases          | B.4.1  | 0.0032           | 0.0001            | 0.0033       | 0.0037       | 0.0003  |              |
| Upper digestive system diseases                     | B.4.2  | 0.0018           | 0.0009            | 0.0027       | 0.0026       | -0.0001 |              |
| Appendicitis                                        | B.4.3  | 0.0013           | 0.0000            | 0.0013       | 0.0014       | 0.0000  |              |
| Paralytic ileus and intestinal obstruction          | B.4.4  | 0.0020           | -0.0001           | 0.0019       | 0.0284       | 0.0265  |              |
| Inguinal, femoral, and abdominal hernia             | B.4.5  | 0.0003           | 0.0003            | 0.0005       | 0.0043       | 0.0038  |              |
| Inflammatory bowel disease                          | B.4.6  | 0.0009           | 0.0000            | 0.0009       | 0.0027       | 0.0018  |              |
| Vascular intestinal disorders                       | B.4.7  | 0.0001           | 0.0000            | 0.0001       | 0.0001       | 0.0000  |              |
| Gallbladder and biliary diseases                    | B.4.8  | 0.0006           | 0.0003            | 0.0009       | 0.0014       | 0.0005  |              |
| Pancreatitis                                        | B.4.9  | 0.0003           | 0.0000            | 0.0003       | 0.0003       | -0.0001 |              |
| Other digestive diseases                            | B.4.10 | 0.0046           | 0.0003            | 0.0049       | 0.0118       | 0.0070  |              |
| Neurological disorders                              | B.5    | 0.0077           | -0.0020           | 0.0057       | 0.0171       | 0.0114  |              |
| Alzheimer's disease and other dementias             | B.5.1  | 0.0000           | 0.0000            | 0.0000       | 0.0000       | 0.0000  |              |
| Parkinson's disease                                 | B.5.2  | 0.0000           | 0.0000            | 0.0000       | 0.0000       | 0.0000  |              |
| Idiopathic epilepsy                                 | B.5.3  | 0.0071           | 0.0005            | 0.0075       | 0.0130       | 0.0054  |              |
| Multiple sclerosis                                  | B.5.4  | 0.0001           | 0.0000            | 0.0001       | 0.0000       | 0.0000  |              |
| Motor neuron disease                                | B.5.5  | 0.0002           | 0.0000            | 0.0002       | 0.0023       | 0.0021  |              |
| Headache disorders                                  | B.5.6  | 0.0000           | -0.0013           | -0.0013      | 0.0000       | 0.0013  |              |
| Other neurological disorders                        | B.5.7  | 0.0004           | -0.0012           | -0.0008      | 0.0017       | 0.0025  |              |



| Causes                                           | Level  | $\Delta$ HALE    |                   |              | $\Delta$ LE  |         | $\Delta$ LED |
|--------------------------------------------------|--------|------------------|-------------------|--------------|--------------|---------|--------------|
|                                                  |        | Mortality Effect | Disability Effect | Total Effect | Total Effect |         |              |
| Mental disorders                                 | B.6    | 0.0000           | -0.0019           | -0.0019      | 0.0000       | 0.0019  |              |
| Schizophrenia                                    | B.6.1  | 0.0000           | 0.0000            | 0.0000       | 0.0000       | 0.0000  |              |
| Depressive disorders                             | B.6.2  | 0.0000           | 0.0001            | 0.0001       | 0.0000       | -0.0001 |              |
| Bipolar disorder                                 | B.6.3  | 0.0000           | 0.0000            | 0.0000       | 0.0000       | 0.0000  |              |
| Anxiety disorders                                | B.6.4  | 0.0000           | -0.0012           | -0.0012      | 0.0000       | 0.0012  |              |
| Eating disorders                                 | B.6.5  | 0.0000           | -0.0003           | -0.0003      | 0.0000       | 0.0003  |              |
| Autism spectrum disorders                        | B.6.6  | 0.0000           | -0.0005           | -0.0005      | 0.0000       | 0.0005  |              |
| Attention-deficit/hyperactivity disorder         | B.6.7  | 0.0000           | -0.0011           | -0.0011      | 0.0000       | 0.0011  |              |
| Conduct disorder                                 | B.6.8  | 0.0000           | -0.0010           | -0.0010      | 0.0000       | 0.0010  |              |
| Idiopathic developmental intellectual disability | B.6.9  | 0.0000           | 0.0022            | 0.0022       | 0.0000       | -0.0022 |              |
| Other mental disorders                           | B.6.10 | 0.0000           | 0.0000            | 0.0000       | 0.0000       | 0.0000  |              |
| Substance use disorders                          | B.7    | 0.0000           | 0.0000            | 0.0000       | 0.0000       | 0.0000  |              |
| Alcohol use disorders                            | B.7.1  | 0.0000           | 0.0001            | 0.0001       | 0.0000       | -0.0001 |              |
| Drug use disorders                               | B.7.2  | 0.0000           | 0.0000            | 0.0000       | 0.0000       | 0.0000  |              |
| Diabetes and kidney diseases                     | B.8    | 0.0086           | 0.0001            | 0.0087       | 0.0149       | 0.0062  |              |
| Diabetes mellitus                                | B.8.1  | 0.0010           | -0.0001           | 0.0009       | 0.0021       | 0.0012  |              |
| Chronic kidney disease                           | B.8.2  | 0.0052           | 0.0002            | 0.0054       | 0.0093       | 0.0039  |              |
| Acute glomerulonephritis                         | B.8.3  | 0.0024           | 0.0000            | 0.0024       | 0.0035       | 0.0012  |              |
| Skin and subcutaneous diseases                   | B.9    | 0.0008           | -0.0037           | -0.0029      | 0.0035       | 0.0064  |              |
| Dermatitis                                       | B.9.1  | 0.0000           | -0.0001           | -0.0001      | 0.0000       | 0.0001  |              |
| Psoriasis                                        | B.9.2  | 0.0000           | 0.0006            | 0.0006       | 0.0000       | -0.0006 |              |
| Bacterial skin diseases                          | B.9.3  | 0.0008           | 0.0000            | 0.0008       | 0.0035       | 0.0027  |              |
| Scabies                                          | B.9.4  | 0.0000           | 0.0004            | 0.0004       | 0.0000       | -0.0004 |              |
| Fungal skin diseases                             | B.9.5  | 0.0000           | 0.0003            | 0.0003       | 0.0000       | -0.0003 |              |
| Viral skin diseases                              | B.9.6  | 0.0000           | -0.0001           | -0.0001      | 0.0000       | 0.0001  |              |
| Acne vulgaris                                    | B.9.7  | 0.0000           | -0.0041           | -0.0041      | 0.0000       | 0.0041  |              |
| Alopecia areata                                  | B.9.8  | 0.0000           | 0.0000            | 0.0000       | 0.0000       | 0.0000  |              |
| Pruritus                                         | B.9.9  | 0.0000           | -0.0001           | -0.0001      | 0.0000       | 0.0001  |              |
| Urticaria                                        | B.9.10 | 0.0000           | 0.0000            | 0.0000       | 0.0000       | 0.0000  |              |
| Decubitus ulcer                                  | B.9.11 | 0.0000           | 0.0000            | 0.0000       | 0.0000       | 0.0000  |              |
| Other skin and subcutaneous diseases             | B.9.12 | 0.0000           | -0.0006           | -0.0006      | 0.0000       | 0.0006  |              |
| Sense organ diseases                             | B.10   | 0.0000           | 0.0001            | 0.0001       | 0.0000       | -0.0001 |              |
| Blindness and vision loss                        | B.10.1 | 0.0000           | -0.0003           | -0.0003      | 0.0000       | 0.0003  |              |
| Age-related and other hearing loss               | B.10.2 | 0.0000           | 0.0005            | 0.0005       | 0.0000       | -0.0005 |              |
| Other sense organ diseases                       | B.10.3 | 0.0000           | -0.0001           | -0.0001      | 0.0000       | 0.0001  |              |
| Musculoskeletal disorders                        | B.11   | 0.0005           | 0.0000            | 0.0006       | 0.0003       | -0.0003 |              |
| Rheumatoid arthritis                             | B.11.1 | 0.0001           | 0.0000            | 0.0001       | 0.0001       | 0.0000  |              |
| Osteoarthritis                                   | B.11.2 | 0.0000           | 0.0000            | 0.0000       | 0.0000       | 0.0000  |              |
| Low back pain                                    | B.11.3 | 0.0000           | 0.0001            | 0.0001       | 0.0000       | -0.0001 |              |
| Neck pain                                        | B.11.4 | 0.0000           | 0.0000            | 0.0000       | 0.0000       | 0.0000  |              |
| Gout                                             | B.11.5 | 0.0000           | 0.0000            | 0.0000       | 0.0000       | 0.0000  |              |
| Other musculoskeletal disorders                  | B.11.6 | 0.0004           | -0.0001           | 0.0004       | 0.0003       | -0.0001 |              |

| Causes                                            | Level  | $\Delta$ HALE    |                   |              | $\Delta$ LE  |         | $\Delta$ LED |
|---------------------------------------------------|--------|------------------|-------------------|--------------|--------------|---------|--------------|
|                                                   |        | Mortality Effect | Disability Effect | Total Effect | Total Effect |         |              |
| Other non-communicable diseases                   | B.12   | 0.0446           | 0.0143            | 0.0589       | 0.4462       | 0.3873  |              |
| Congenital birth defects                          | B.12.1 | 0.0366           | 0.0018            | 0.0384       | 0.4145       | 0.3761  |              |
| Urinary diseases and male infertility             | B.12.2 | 0.0010           | 0.0000            | 0.0010       | 0.0018       | 0.0009  |              |
| Gynecological diseases                            | B.12.3 | 0.0000           | 0.0004            | 0.0004       | 0.0000       | -0.0004 |              |
| Hemoglobinopathies and hemolytic anemias          | B.12.4 | 0.0051           | 0.0102            | 0.0153       | 0.0131       | -0.0021 |              |
| Endocrine, metabolic, blood, and immune disorders | B.12.5 | 0.0019           | 0.0013            | 0.0033       | 0.0083       | 0.0050  |              |
| Oral disorders                                    | B.12.6 | 0.0000           | 0.0004            | 0.0004       | 0.0000       | -0.0004 |              |
| <b>Injuries</b>                                   | C      | 0.3093           | 0.0035            | 0.3128       | 0.5921       | 0.2793  |              |
| Transport injuries                                | C.1    | 0.0604           | -0.0002           | 0.0602       | 0.1000       | 0.0398  |              |
| Road injuries                                     | C.1.1  | 0.0556           | -0.0004           | 0.0552       | 0.0919       | 0.0366  |              |
| Other transport injuries                          | C.1.2  | 0.0047           | 0.0002            | 0.0050       | 0.0081       | 0.0031  |              |
| Unintentional injuries                            | C.2    | 0.2161           | 0.0033            | 0.2195       | 0.4570       | 0.2376  |              |
| Falls                                             | C.2.1  | 0.0092           | 0.0014            | 0.0106       | 0.0249       | 0.0144  |              |
| Drowning                                          | C.2.2  | 0.1698           | 0.0002            | 0.1700       | 0.2675       | 0.0975  |              |
| Fire, heat, and hot substances                    | C.2.3  | 0.0065           | 0.0000            | 0.0065       | 0.0192       | 0.0127  |              |
| Poisonings                                        | C.2.4  | 0.0072           | 0.0000            | 0.0072       | 0.0197       | 0.0125  |              |
| Exposure to mechanical forces                     | C.2.5  | 0.0050           | 0.0002            | 0.0052       | 0.0121       | 0.0069  |              |
| Adverse effects of medical treatment              | C.2.6  | 0.0042           | 0.0000            | 0.0042       | 0.0167       | 0.0125  |              |
| Animal contact                                    | C.2.7  | 0.0046           | 0.0002            | 0.0048       | 0.0081       | 0.0033  |              |
| Foreign body                                      | C.2.8  | 0.0047           | 0.0010            | 0.0056       | 0.0742       | 0.0686  |              |
| Environmental heat and cold exposure              | C.2.9  | 0.0014           | 0.0003            | 0.0016       | 0.0081       | 0.0065  |              |
| Exposure to forces of nature                      | C.2.10 | 0.0008           | 0.0000            | 0.0008       | 0.0008       | -0.0001 |              |
| Other unintentional injuries                      | C.2.11 | 0.0027           | 0.0002            | 0.0029       | 0.0056       | 0.0027  |              |
| Self-harm and interpersonal violence              | C.3    | 0.0328           | 0.0004            | 0.0331       | 0.0351       | 0.0019  |              |
| Self-harm                                         | C.3.1  | 0.0178           | 0.0000            | 0.0179       | 0.0083       | -0.0096 |              |
| Interpersonal violence                            | C.3.2  | 0.0148           | 0.0003            | 0.0151       | 0.0265       | 0.0114  |              |
| Conflict and terrorism                            | C.3.3  | 0.0000           | 0.0000            | 0.0000       | 0.0000       | 0.0000  |              |
| Executions and police conflict                    | C.3.4  | 0.0001           | 0.0000            | 0.0002       | 0.0003       | 0.0001  |              |

**Table S7b | Cause-specific effects of mortality and disability (years) on changes in life expectancy (LE) and health-adjusted life expectancy (HALE) for those aged 15-44 years from 1990 to 2019.**

| Causes                                                            | Level  | $\Delta$ HALE    |                   |              | $\Delta$ LE  | $\Delta$ LED |
|-------------------------------------------------------------------|--------|------------------|-------------------|--------------|--------------|--------------|
|                                                                   |        | Mortality Effect | Disability Effect | Total Effect | Total Effect |              |
| <b>Communicable, maternal, neonatal, and nutritional diseases</b> | A      | 0.2484           | 0.0584            | 0.3068       | 0.1508       | -0.1560      |
| HIV/AIDS and sexually transmitted infections                      | A.1    | -0.0321          | -0.0010           | -0.0331      | -0.0203      | 0.0127       |
| HIV/AIDS                                                          | A.1.1  | -0.0329          | -0.0012           | -0.0342      | -0.0209      | 0.0133       |
| Sexually transmitted infections excluding HIV                     | A.1.2  | 0.0008           | 0.0003            | 0.0011       | 0.0005       | -0.0006      |
| Respiratory infections and tuberculosis                           | A.2    | 0.1446           | 0.0097            | 0.1543       | 0.0915       | -0.0628      |
| Tuberculosis                                                      | A.2.1  | 0.1023           | 0.0056            | 0.1078       | 0.0660       | -0.0419      |
| Lower respiratory infections                                      | A.2.2  | 0.0391           | 0.0004            | 0.0396       | 0.0235       | -0.0160      |
| Upper respiratory infections                                      | A.2.3  | 0.0031           | -0.0001           | 0.0030       | 0.0019       | -0.0011      |
| Otitis media                                                      | A.2.4  | 0.0002           | 0.0037            | 0.0039       | 0.0001       | -0.0038      |
| Enteric infections                                                | A.3    | 0.0148           | 0.0002            | 0.0150       | 0.0088       | -0.0062      |
| Diarrheal diseases                                                | A.3.1  | 0.0111           | 0.0002            | 0.0112       | 0.0067       | -0.0045      |
| Typhoid and paratyphoid                                           | A.3.2  | 0.0030           | 0.0000            | 0.0030       | 0.0016       | -0.0014      |
| Invasive Non-typhoidal Salmonella (iNTS)                          | A.3.3  | 0.0006           | 0.0000            | 0.0006       | 0.0003       | -0.0002      |
| Other intestinal infectious diseases                              | A.3.4  | 0.0001           | 0.0000            | 0.0001       | 0.0001       | 0.0000       |
| Neglected tropical diseases and malaria                           | A.4    | 0.0053           | 0.0370            | 0.0423       | 0.0032       | -0.0391      |
| Malaria                                                           | A.4.1  | 0.0030           | 0.0003            | 0.0033       | 0.0017       | -0.0016      |
| Chagas disease                                                    | A.4.2  | 0.0000           | 0.0000            | 0.0000       | 0.0000       | 0.0000       |
| Leishmaniasis                                                     | A.4.3  | 0.0000           | 0.0000            | 0.0000       | 0.0000       | 0.0000       |
| African trypanosomiasis                                           | A.4.4  | 0.0000           | 0.0000            | 0.0000       | 0.0000       | 0.0000       |
| Schistosomiasis                                                   | A.4.5  | 0.0011           | 0.0027            | 0.0038       | 0.0008       | -0.0031      |
| Cysticercosis                                                     | A.4.6  | 0.0001           | 0.0011            | 0.0012       | 0.0001       | -0.0012      |
| Cystic echinococcosis                                             | A.4.7  | 0.0000           | 0.0000            | 0.0000       | 0.0000       | 0.0000       |
| Lymphatic filariasis                                              | A.4.8  | 0.0000           | 0.0000            | 0.0000       | 0.0000       | 0.0000       |
| Onchocerciasis                                                    | A.4.9  | 0.0000           | 0.0000            | 0.0000       | 0.0000       | 0.0000       |
| Trachoma                                                          | A.4.10 | 0.0000           | 0.0001            | 0.0001       | 0.0000       | -0.0001      |
| Dengue                                                            | A.4.11 | 0.0000           | -0.0012           | -0.0012      | 0.0000       | 0.0012       |
| Yellow fever                                                      | A.4.12 | 0.0000           | 0.0000            | 0.0000       | 0.0000       | 0.0000       |
| Rabies                                                            | A.4.13 | 0.0006           | 0.0000            | 0.0006       | 0.0004       | -0.0002      |
| Intestinal nematode infections                                    | A.4.14 | 0.0001           | 0.0199            | 0.0200       | 0.0000       | -0.0199      |
| Food-borne trematodiasis                                          | A.4.15 | 0.0000           | 0.0119            | 0.0119       | 0.0000       | -0.0119      |
| Leprosy                                                           | A.4.16 | 0.0000           | 0.0000            | 0.0000       | 0.0000       | 0.0000       |
| Ebola                                                             | A.4.17 | 0.0000           | 0.0000            | 0.0000       | 0.0000       | 0.0000       |
| Zika virus                                                        | A.4.18 | 0.0000           | 0.0000            | 0.0000       | 0.0000       | 0.0000       |
| Guinea worm disease                                               | A.4.19 | 0.0000           | 0.0000            | 0.0000       | 0.0000       | 0.0000       |
| Other neglected tropical diseases                                 | A.4.20 | 0.0004           | 0.0022            | 0.0026       | 0.0003       | -0.0024      |
| Other infectious diseases                                         | A.5    | 0.0486           | 0.0067            | 0.0553       | 0.0301       | -0.0251      |
| Meningitis                                                        | A.5.1  | 0.0129           | 0.0022            | 0.0151       | 0.0075       | -0.0076      |
| Encephalitis                                                      | A.5.2  | 0.0020           | 0.0017            | 0.0037       | 0.0011       | -0.0026      |
| Diphtheria                                                        | A.5.3  | 0.0001           | 0.0000            | 0.0001       | 0.0000       | 0.0000       |

| Causes                                  | Level    | $\Delta$ HALE    |                   | $\Delta$ LE   |               | $\Delta$ LED   |
|-----------------------------------------|----------|------------------|-------------------|---------------|---------------|----------------|
|                                         |          | Mortality Effect | Disability Effect | Total Effect  | Total Effect  |                |
| Whooping cough                          | A.5.4    | 0.0016           | 0.0000            | 0.0016        | 0.0009        | -0.0007        |
| Tetanus                                 | A.5.5    | 0.0049           | 0.0000            | 0.0049        | 0.0032        | -0.0017        |
| Measles                                 | A.5.6    | 0.0028           | 0.0000            | 0.0028        | 0.0015        | -0.0013        |
| Varicella and herpes zoster             | A.5.7    | 0.0010           | 0.0000            | 0.0010        | 0.0006        | -0.0004        |
| Acute hepatitis                         | A.5.8    | 0.0208           | 0.0005            | 0.0213        | 0.0137        | -0.0075        |
| Other unspecified infectious diseases   | A.5.9    | 0.0026           | 0.0022            | 0.0048        | 0.0016        | -0.0032        |
| Maternal and neonatal disorders         | A.6      | 0.0624           | -0.0372           | 0.0251        | 0.0345        | 0.0094         |
| Maternal disorders                      | A.6.1    | 0.0624           | 0.0039            | 0.0663        | 0.0345        | -0.0317        |
| Neonatal disorders                      | A.6.2    | 0.0000           | -0.0412           | -0.0412       | 0.0000        | 0.0412         |
| Nutritional deficiencies                | A.7      | 0.0049           | 0.0430            | 0.0479        | 0.0029        | -0.0450        |
| Protein-energy malnutrition             | A.7.1    | 0.0048           | -0.0056           | -0.0009       | 0.0029        | 0.0037         |
| Iodine deficiency                       | A.7.2    | 0.0000           | 0.0014            | 0.0014        | 0.0000        | -0.0014        |
| Vitamin A deficiency                    | A.7.3    | 0.0000           | 0.0001            | 0.0001        | 0.0000        | -0.0001        |
| Dietary iron deficiency                 | A.7.4    | 0.0000           | 0.0487            | 0.0487        | 0.0000        | -0.0487        |
| Other nutritional deficiencies          | A.7.5    | 0.0001           | -0.0015           | -0.0014       | 0.0001        | 0.0014         |
| <b>Non-communicable diseases</b>        | <b>B</b> | <b>0.7465</b>    | <b>0.1433</b>     | <b>0.8898</b> | <b>0.5117</b> | <b>-0.3781</b> |
| Neoplasms                               | B.1      | 0.2084           | -0.0052           | 0.2032        | 0.1505        | -0.0528        |
| Lip and oral cavity cancer              | B.1.1    | 0.0005           | 0.0000            | 0.0005        | 0.0003        | -0.0002        |
| Nasopharynx cancer                      | B.1.2    | 0.0117           | -0.0006           | 0.0111        | 0.0081        | -0.0030        |
| Other pharynx cancer                    | B.1.3    | 0.0006           | 0.0000            | 0.0006        | 0.0004        | -0.0001        |
| Esophageal cancer                       | B.1.4    | 0.0116           | 0.0001            | 0.0117        | 0.0096        | -0.0020        |
| Stomach cancer                          | B.1.5    | 0.0393           | -0.0001           | 0.0391        | 0.0297        | -0.0095        |
| Colon and rectum cancer                 | B.1.6    | -0.0038          | -0.0009           | -0.0047       | -0.0030       | 0.0017         |
| Liver cancer                            | B.1.7    | 0.0851           | 0.0003            | 0.0854        | 0.0634        | -0.0219        |
| Gallbladder and biliary tract cancer    | B.1.8    | 0.0005           | 0.0000            | 0.0005        | 0.0003        | -0.0002        |
| Pancreatic cancer                       | B.1.9    | -0.0043          | 0.0000            | -0.0043       | -0.0034       | 0.0009         |
| Larynx cancer                           | B.1.10   | 0.0014           | 0.0000            | 0.0014        | 0.0010        | -0.0003        |
| Tracheal, bronchus, and lung cancer     | B.1.11   | 0.0130           | 0.0000            | 0.0130        | 0.0099        | -0.0030        |
| Malignant skin melanoma                 | B.1.12   | 0.0005           | -0.0001           | 0.0005        | 0.0004        | -0.0001        |
| Non-melanoma skin cancer                | B.1.13   | 0.0000           | 0.0000            | 0.0000        | 0.0000        | 0.0000         |
| Breast cancer                           | B.1.14   | 0.0052           | -0.0011           | 0.0041        | 0.0041        | 0.0000         |
| Cervical cancer                         | B.1.15   | 0.0020           | -0.0003           | 0.0017        | 0.0011        | -0.0005        |
| Uterine cancer                          | B.1.16   | 0.0027           | -0.0001           | 0.0026        | 0.0019        | -0.0006        |
| Ovarian cancer                          | B.1.17   | 0.0000           | -0.0001           | -0.0001       | -0.0001       | 0.0000         |
| Prostate cancer                         | B.1.18   | 0.0002           | 0.0000            | 0.0001        | 0.0001        | 0.0000         |
| Testicular cancer                       | B.1.19   | 0.0002           | -0.0002           | 0.0001        | 0.0001        | 0.0001         |
| Kidney cancer                           | B.1.20   | -0.0023          | -0.0002           | -0.0025       | -0.0016       | 0.0009         |
| Bladder cancer                          | B.1.21   | 0.0015           | -0.0001           | 0.0014        | 0.0010        | -0.0004        |
| Brain and central nervous system cancer | B.1.22   | 0.0038           | -0.0003           | 0.0034        | 0.0026        | -0.0008        |
| Thyroid cancer                          | B.1.23   | 0.0006           | -0.0001           | 0.0004        | 0.0004        | -0.0001        |
| Mesothelioma                            | B.1.24   | 0.0000           | 0.0000            | 0.0000        | 0.0000        | 0.0000         |
| Hodgkin lymphoma                        | B.1.25   | 0.0040           | 0.0000            | 0.0040        | 0.0024        | -0.0016        |

| Causes                                              | Level  | $\Delta$ HALE    |                   |              | $\Delta$ LE  |         | $\Delta$ LED |
|-----------------------------------------------------|--------|------------------|-------------------|--------------|--------------|---------|--------------|
|                                                     |        | Mortality Effect | Disability Effect | Total Effect | Total Effect |         |              |
| Non-Hodgkin lymphoma                                | B.1.26 | -0.0022          | -0.0003           | -0.0025      | -0.0014      | 0.0011  |              |
| Multiple myeloma                                    | B.1.27 | -0.0009          | 0.0000            | -0.0009      | -0.0005      | 0.0004  |              |
| Leukemia                                            | B.1.28 | 0.0301           | -0.0003           | 0.0298       | 0.0183       | -0.0115 |              |
| Other malignant neoplasms                           | B.1.29 | 0.0077           | -0.0006           | 0.0071       | 0.0051       | -0.0020 |              |
| Other neoplasms                                     | B.1.30 | -0.0003          | 0.0000            | -0.0002      | -0.0002      | 0.0001  |              |
| Cardiovascular diseases                             | B.2    | 0.1963           | 0.0021            | 0.1985       | 0.1364       | -0.0620 |              |
| Rheumatic heart disease                             | B.2.1  | 0.0562           | 0.0014            | 0.0576       | 0.0377       | -0.0199 |              |
| Ischemic heart disease                              | B.2.2  | 0.0264           | -0.0003           | 0.0261       | 0.0175       | -0.0086 |              |
| Stroke                                              | B.2.3  | 0.0899           | 0.0023            | 0.0921       | 0.0650       | -0.0272 |              |
| Hypertensive heart disease                          | B.2.4  | 0.0163           | -0.0001           | 0.0162       | 0.0116       | -0.0047 |              |
| Non-rheumatic valvular heart disease                | B.2.5  | 0.0009           | 0.0000            | 0.0009       | 0.0006       | -0.0004 |              |
| Cardiomyopathy and myocarditis                      | B.2.6  | 0.0016           | 0.0000            | 0.0015       | 0.0010       | -0.0006 |              |
| Atrial fibrillation and flutter                     | B.2.8  | 0.0001           | 0.0000            | 0.0000       | 0.0000       | 0.0000  |              |
| Aortic aneurysm                                     | B.2.9  | -0.0002          | 0.0000            | -0.0002      | -0.0002      | 0.0000  |              |
| Peripheral artery disease                           | B.2.10 | 0.0000           | 0.0000            | 0.0000       | 0.0000       | 0.0000  |              |
| Endocarditis                                        | B.2.11 | 0.0017           | 0.0000            | 0.0017       | 0.0010       | -0.0007 |              |
| Other cardiovascular and circulatory diseases       | B.2.12 | 0.0034           | -0.0010           | 0.0024       | 0.0022       | -0.0002 |              |
| Chronic respiratory diseases                        | B.3    | 0.0747           | 0.0112            | 0.0859       | 0.0524       | -0.0335 |              |
| Chronic obstructive pulmonary disease               | B.3.1  | 0.0605           | 0.0097            | 0.0702       | 0.0430       | -0.0272 |              |
| Pneumoconiosis                                      | B.3.2  | 0.0039           | 0.0010            | 0.0049       | 0.0028       | -0.0021 |              |
| Asthma                                              | B.3.3  | 0.0101           | 0.0012            | 0.0114       | 0.0065       | -0.0049 |              |
| Interstitial lung disease and pulmonary sarcoidosis | B.3.4  | 0.0002           | 0.0001            | 0.0003       | 0.0001       | -0.0002 |              |
| Other chronic respiratory diseases                  | B.3.5  | 0.0000           | -0.0009           | -0.0009      | 0.0000       | 0.0009  |              |
| Digestive diseases                                  | B.4    | 0.1235           | 0.0076            | 0.1311       | 0.0854       | -0.0456 |              |
| Cirrhosis and other chronic liver diseases          | B.4.1  | 0.0782           | 0.0006            | 0.0788       | 0.0556       | -0.0233 |              |
| Upper digestive system diseases                     | B.4.2  | 0.0223           | 0.0037            | 0.0260       | 0.0153       | -0.0107 |              |
| Appendicitis                                        | B.4.3  | 0.0030           | 0.0000            | 0.0030       | 0.0018       | -0.0012 |              |
| Paralytic ileus and intestinal obstruction          | B.4.4  | 0.0040           | 0.0000            | 0.0040       | 0.0024       | -0.0015 |              |
| Inguinal, femoral, and abdominal hernia             | B.4.5  | 0.0003           | 0.0007            | 0.0010       | 0.0002       | -0.0008 |              |
| Inflammatory bowel disease                          | B.4.6  | 0.0014           | -0.0010           | 0.0004       | 0.0009       | 0.0005  |              |
| Vascular intestinal disorders                       | B.4.7  | 0.0002           | 0.0000            | 0.0002       | 0.0001       | -0.0001 |              |
| Gallbladder and biliary diseases                    | B.4.8  | 0.0036           | 0.0034            | 0.0070       | 0.0025       | -0.0046 |              |
| Pancreatitis                                        | B.4.9  | 0.0048           | 0.0001            | 0.0049       | 0.0031       | -0.0018 |              |
| Other digestive diseases                            | B.4.10 | 0.0057           | 0.0002            | 0.0059       | 0.0037       | -0.0022 |              |
| Neurological disorders                              | B.5    | 0.0178           | -0.0131           | 0.0047       | 0.0106       | 0.0059  |              |
| Alzheimer's disease and other dementias             | B.5.1  | 0.0000           | 0.0000            | 0.0000       | 0.0000       | 0.0000  |              |
| Parkinson's disease                                 | B.5.2  | 0.0003           | -0.0001           | 0.0002       | 0.0003       | 0.0000  |              |
| Idiopathic epilepsy                                 | B.5.3  | 0.0181           | 0.0000            | 0.0180       | 0.0105       | -0.0075 |              |
| Multiple sclerosis                                  | B.5.4  | 0.0004           | 0.0000            | 0.0004       | 0.0003       | -0.0001 |              |
| Motor neuron disease                                | B.5.5  | 0.0003           | 0.0000            | 0.0003       | 0.0002       | -0.0001 |              |
| Headache disorders                                  | B.5.6  | 0.0000           | -0.0120           | -0.0120      | 0.0000       | 0.0120  |              |
| Other neurological disorders                        | B.5.7  | -0.0013          | -0.0010           | -0.0022      | -0.0006      | 0.0016  |              |

| Causes                                           | Level  | $\Delta$ HALE    |                   |              | $\Delta$ LE  |         | $\Delta$ LED |
|--------------------------------------------------|--------|------------------|-------------------|--------------|--------------|---------|--------------|
|                                                  |        | Mortality Effect | Disability Effect | Total Effect | Total Effect |         |              |
| Mental disorders                                 | B.6    | -0.0001          | 0.0591            | 0.0590       | 0.0000       | -0.0591 |              |
| Schizophrenia                                    | B.6.1  | 0.0000           | -0.0035           | -0.0035      | 0.0000       | 0.0035  |              |
| Depressive disorders                             | B.6.2  | 0.0000           | 0.0503            | 0.0503       | 0.0000       | -0.0503 |              |
| Bipolar disorder                                 | B.6.3  | 0.0000           | -0.0001           | -0.0001      | 0.0000       | 0.0001  |              |
| Anxiety disorders                                | B.6.4  | 0.0000           | 0.0162            | 0.0162       | 0.0000       | -0.0162 |              |
| Eating disorders                                 | B.6.5  | -0.0001          | -0.0059           | -0.0060      | 0.0000       | 0.0059  |              |
| Autism spectrum disorders                        | B.6.6  | 0.0000           | -0.0007           | -0.0007      | 0.0000       | 0.0007  |              |
| Attention-deficit/hyperactivity disorder         | B.6.7  | 0.0000           | 0.0000            | 0.0000       | 0.0000       | 0.0000  |              |
| Conduct disorder                                 | B.6.8  | 0.0000           | -0.0004           | -0.0004      | 0.0000       | 0.0004  |              |
| Idiopathic developmental intellectual disability | B.6.9  | 0.0000           | 0.0033            | 0.0033       | 0.0000       | -0.0033 |              |
| Other mental disorders                           | B.6.10 | 0.0000           | -0.0001           | -0.0001      | 0.0000       | 0.0001  |              |
| Substance use disorders                          | B.7    | 0.0456           | 0.0150            | 0.0606       | 0.0263       | -0.0343 |              |
| Alcohol use disorders                            | B.7.1  | -0.0019          | 0.0042            | 0.0022       | -0.0015      | -0.0037 |              |
| Drug use disorders                               | B.7.2  | 0.0475           | 0.0108            | 0.0584       | 0.0278       | -0.0306 |              |
| Diabetes and kidney diseases                     | B.8    | 0.0550           | -0.0145           | 0.0405       | 0.0352       | -0.0053 |              |
| Diabetes mellitus                                | B.8.1  | 0.0060           | -0.0149           | -0.0089      | 0.0040       | 0.0129  |              |
| Chronic kidney disease                           | B.8.2  | 0.0405           | 0.0004            | 0.0409       | 0.0259       | -0.0150 |              |
| Acute glomerulonephritis                         | B.8.3  | 0.0085           | 0.0000            | 0.0085       | 0.0053       | -0.0033 |              |
| Skin and subcutaneous diseases                   | B.9    | 0.0020           | -0.0073           | -0.0053      | 0.0013       | 0.0065  |              |
| Dermatitis                                       | B.9.1  | 0.0000           | -0.0007           | -0.0007      | 0.0000       | 0.0007  |              |
| Psoriasis                                        | B.9.2  | 0.0000           | 0.0035            | 0.0035       | 0.0000       | -0.0035 |              |
| Bacterial skin diseases                          | B.9.3  | 0.0022           | 0.0000            | 0.0022       | 0.0014       | -0.0008 |              |
| Scabies                                          | B.9.4  | 0.0000           | 0.0008            | 0.0008       | 0.0000       | -0.0008 |              |
| Fungal skin diseases                             | B.9.5  | 0.0000           | 0.0002            | 0.0002       | 0.0000       | -0.0002 |              |
| Viral skin diseases                              | B.9.6  | 0.0000           | -0.0001           | -0.0001      | 0.0000       | 0.0001  |              |
| Acne vulgaris                                    | B.9.7  | 0.0000           | -0.0091           | -0.0091      | 0.0000       | 0.0091  |              |
| Alopecia areata                                  | B.9.8  | 0.0000           | 0.0000            | 0.0000       | 0.0000       | 0.0000  |              |
| Pruritus                                         | B.9.9  | 0.0000           | -0.0003           | -0.0003      | 0.0000       | 0.0003  |              |
| Urticaria                                        | B.9.10 | 0.0000           | 0.0000            | 0.0000       | 0.0000       | 0.0000  |              |
| Decubitus ulcer                                  | B.9.11 | -0.0002          | 0.0000            | -0.0002      | -0.0001      | 0.0000  |              |
| Other skin and subcutaneous diseases             | B.9.12 | 0.0000           | -0.0015           | -0.0015      | 0.0000       | 0.0015  |              |
| Sense organ diseases                             | B.10   | 0.0000           | 0.0023            | 0.0023       | 0.0000       | -0.0023 |              |
| Blindness and vision loss                        | B.10.1 | 0.0000           | 0.0011            | 0.0011       | 0.0000       | -0.0011 |              |
| Age-related and other hearing loss               | B.10.2 | 0.0000           | 0.0015            | 0.0015       | 0.0000       | -0.0015 |              |
| Other sense organ diseases                       | B.10.3 | 0.0000           | -0.0003           | -0.0003      | 0.0000       | 0.0003  |              |
| Musculoskeletal disorders                        | B.11   | -0.0014          | 0.0295            | 0.0281       | -0.0007      | -0.0288 |              |
| Rheumatoid arthritis                             | B.11.1 | 0.0005           | -0.0003           | 0.0002       | 0.0004       | 0.0002  |              |
| Osteoarthritis                                   | B.11.2 | 0.0000           | -0.0007           | -0.0007      | 0.0000       | 0.0007  |              |
| Low back pain                                    | B.11.3 | 0.0000           | 0.0565            | 0.0565       | 0.0000       | -0.0565 |              |
| Neck pain                                        | B.11.4 | 0.0000           | 0.0055            | 0.0055       | 0.0000       | -0.0055 |              |
| Gout                                             | B.11.5 | 0.0000           | -0.0006           | -0.0006      | 0.0000       | 0.0006  |              |
| Other musculoskeletal disorders                  | B.11.6 | -0.0019          | -0.0309           | -0.0328      | -0.0011      | 0.0318  |              |

| Causes                                            | Level  | $\Delta$ HALE    |                   |              | $\Delta$ LE  |         | $\Delta$ LED |
|---------------------------------------------------|--------|------------------|-------------------|--------------|--------------|---------|--------------|
|                                                   |        | Mortality Effect | Disability Effect | Total Effect | Total Effect |         |              |
| Other non-communicable diseases                   | B.12   | 0.0246           | 0.0566            | 0.0811       | 0.0143       | -0.0668 |              |
| Congenital birth defects                          | B.12.1 | 0.0125           | 0.0034            | 0.0159       | 0.0069       | -0.0090 |              |
| Urinary diseases and male infertility             | B.12.2 | 0.0042           | 0.0002            | 0.0043       | 0.0027       | -0.0017 |              |
| Gynecological diseases                            | B.12.3 | -0.0001          | 0.0235            | 0.0235       | -0.0001      | -0.0235 |              |
| Hemoglobinopathies and hemolytic anemias          | B.12.4 | 0.0054           | 0.0219            | 0.0273       | 0.0032       | -0.0241 |              |
| Endocrine, metabolic, blood, and immune disorders | B.12.5 | 0.0026           | 0.0062            | 0.0088       | 0.0016       | -0.0072 |              |
| Oral disorders                                    | B.12.6 | 0.0000           | 0.0014            | 0.0014       | 0.0000       | -0.0014 |              |
| <b>Injuries</b>                                   | C      | 0.6654           | 0.0103            | 0.6757       | 0.3942       | -0.2815 |              |
| Transport injuries                                | C.1    | 0.1276           | -0.0079           | 0.1197       | 0.0791       | -0.0405 |              |
| Road injuries                                     | C.1.1  | 0.1069           | -0.0092           | 0.0978       | 0.0668       | -0.0310 |              |
| Other transport injuries                          | C.1.2  | 0.0207           | 0.0012            | 0.0219       | 0.0124       | -0.0095 |              |
| Unintentional injuries                            | C.2    | 0.1313           | 0.0141            | 0.1454       | 0.0776       | -0.0678 |              |
| Falls                                             | C.2.1  | 0.0084           | 0.0100            | 0.0184       | 0.0052       | -0.0132 |              |
| Drowning                                          | C.2.2  | 0.0650           | 0.0007            | 0.0656       | 0.0371       | -0.0285 |              |
| Fire, heat, and hot substances                    | C.2.3  | 0.0100           | -0.0002           | 0.0097       | 0.0059       | -0.0038 |              |
| Poisonings                                        | C.2.4  | 0.0018           | 0.0000            | 0.0018       | 0.0012       | -0.0006 |              |
| Exposure to mechanical forces                     | C.2.5  | 0.0188           | -0.0018           | 0.0171       | 0.0114       | -0.0057 |              |
| Adverse effects of medical treatment              | C.2.6  | 0.0078           | 0.0000            | 0.0078       | 0.0047       | -0.0031 |              |
| Animal contact                                    | C.2.7  | 0.0070           | 0.0009            | 0.0079       | 0.0044       | -0.0036 |              |
| Foreign body                                      | C.2.8  | 0.0003           | 0.0035            | 0.0037       | 0.0002       | -0.0036 |              |
| Environmental heat and cold exposure              | C.2.9  | 0.0092           | 0.0007            | 0.0099       | 0.0057       | -0.0042 |              |
| Exposure to forces of nature                      | C.2.10 | 0.0021           | -0.0006           | 0.0015       | 0.0012       | -0.0003 |              |
| Other unintentional injuries                      | C.2.11 | 0.0010           | 0.0010            | 0.0020       | 0.0007       | -0.0013 |              |
| Self-harm and interpersonal violence              | C.3    | 0.4065           | 0.0041            | 0.4107       | 0.2374       | -0.1732 |              |
| Self-harm                                         | C.3.1  | 0.3282           | 0.0021            | 0.3303       | 0.1925       | -0.1378 |              |
| Interpersonal violence                            | C.3.2  | 0.0676           | 0.0020            | 0.0696       | 0.0389       | -0.0307 |              |
| Conflict and terrorism                            | C.3.3  | 0.0001           | 0.0000            | 0.0001       | 0.0000       | -0.0001 |              |
| Executions and police conflict                    | C.3.4  | 0.0107           | 0.0000            | 0.0107       | 0.0060       | -0.0047 |              |

**Table S7c | Cause-specific effects of mortality and disability (years) on changes in life expectancy (LE) and health-adjusted life expectancy (HALE) for those aged 45-64 years from 1990 to 2019.**

| Causes                                                            | Level  | ΔHALE            |                   |              | ΔLE          | ΔLED    |
|-------------------------------------------------------------------|--------|------------------|-------------------|--------------|--------------|---------|
|                                                                   |        | Mortality Effect | Disability Effect | Total Effect | Total Effect |         |
| <b>Communicable, maternal, neonatal, and nutritional diseases</b> | A      | 0.1534           | 0.0581            | 0.2115       | 0.1911       | -0.0204 |
| HIV/AIDS and sexually transmitted infections                      | A.1    | -0.0094          | -0.0010           | -0.0104      | -0.0112      | -0.0008 |
| HIV/AIDS                                                          | A.1.1  | -0.0100          | -0.0011           | -0.0111      | -0.0119      | -0.0008 |
| Sexually transmitted infections excluding HIV                     | A.1.2  | 0.0006           | 0.0001            | 0.0007       | 0.0008       | 0.0001  |
| Respiratory infections and tuberculosis                           | A.2    | 0.1291           | 0.0122            | 0.1413       | 0.1608       | 0.0195  |
| Tuberculosis                                                      | A.2.1  | 0.0962           | 0.0101            | 0.1063       | 0.1197       | 0.0134  |
| Lower respiratory infections                                      | A.2.2  | 0.0307           | 0.0005            | 0.0312       | 0.0384       | 0.0072  |
| Upper respiratory infections                                      | A.2.3  | 0.0020           | -0.0001           | 0.0020       | 0.0025       | 0.0006  |
| Otitis media                                                      | A.2.4  | 0.0001           | 0.0016            | 0.0017       | 0.0001       | -0.0016 |
| Enteric infections                                                | A.3    | 0.0064           | -0.0012           | 0.0052       | 0.0079       | 0.0027  |
| Diarrheal diseases                                                | A.3.1  | 0.0061           | -0.0012           | 0.0049       | 0.0075       | 0.0026  |
| Typhoid and paratyphoid                                           | A.3.2  | 0.0001           | 0.0000            | 0.0001       | 0.0002       | 0.0000  |
| Invasive Non-typhoidal Salmonella (iNTS)                          | A.3.3  | 0.0001           | 0.0000            | 0.0001       | 0.0002       | 0.0000  |
| Other intestinal infectious diseases                              | A.3.4  | 0.0000           | 0.0000            | 0.0000       | 0.0000       | 0.0000  |
| Neglected tropical diseases and malaria                           | A.4    | 0.0027           | 0.0280            | 0.0307       | 0.0033       | -0.0274 |
| Malaria                                                           | A.4.1  | 0.0005           | 0.0001            | 0.0007       | 0.0006       | 0.0000  |
| Chagas disease                                                    | A.4.2  | 0.0000           | 0.0000            | 0.0000       | 0.0000       | 0.0000  |
| Leishmaniasis                                                     | A.4.3  | 0.0000           | 0.0000            | 0.0000       | 0.0000       | 0.0000  |
| African trypanosomiasis                                           | A.4.4  | 0.0000           | 0.0000            | 0.0000       | 0.0000       | 0.0000  |
| Schistosomiasis                                                   | A.4.5  | 0.0015           | 0.0009            | 0.0024       | 0.0019       | -0.0005 |
| Cysticercosis                                                     | A.4.6  | 0.0000           | 0.0021            | 0.0022       | 0.0001       | -0.0021 |
| Cystic echinococcosis                                             | A.4.7  | 0.0000           | 0.0000            | 0.0000       | 0.0000       | 0.0000  |
| Lymphatic filariasis                                              | A.4.8  | 0.0000           | 0.0000            | 0.0000       | 0.0000       | 0.0000  |
| Onchocerciasis                                                    | A.4.9  | 0.0000           | 0.0000            | 0.0000       | 0.0000       | 0.0000  |
| Trachoma                                                          | A.4.10 | 0.0000           | 0.0009            | 0.0009       | 0.0000       | -0.0009 |
| Dengue                                                            | A.4.11 | 0.0000           | -0.0003           | -0.0003      | 0.0000       | 0.0003  |
| Yellow fever                                                      | A.4.12 | 0.0000           | 0.0000            | 0.0000       | 0.0000       | 0.0000  |
| Rabies                                                            | A.4.13 | 0.0003           | 0.0000            | 0.0003       | 0.0004       | 0.0001  |
| Intestinal nematode infections                                    | A.4.14 | 0.0000           | 0.0071            | 0.0071       | 0.0000       | -0.0071 |
| Food-borne trematodiasis                                          | A.4.15 | 0.0000           | 0.0154            | 0.0154       | 0.0000       | -0.0154 |
| Leprosy                                                           | A.4.16 | 0.0000           | 0.0000            | 0.0000       | 0.0000       | 0.0000  |
| Ebola                                                             | A.4.17 | 0.0000           | 0.0000            | 0.0000       | 0.0000       | 0.0000  |
| Zika virus                                                        | A.4.18 | 0.0000           | 0.0000            | 0.0000       | 0.0000       | 0.0000  |
| Guinea worm disease                                               | A.4.19 | 0.0000           | 0.0000            | 0.0000       | 0.0000       | 0.0000  |
| Other neglected tropical diseases                                 | A.4.20 | 0.0003           | 0.0018            | 0.0021       | 0.0004       | -0.0017 |
| Other infectious diseases                                         | A.5    | 0.0215           | 0.0037            | 0.0252       | 0.0264       | 0.0013  |
| Meningitis                                                        | A.5.1  | 0.0031           | 0.0010            | 0.0041       | 0.0038       | -0.0002 |
| Encephalitis                                                      | A.5.2  | 0.0004           | 0.0006            | 0.0011       | 0.0005       | -0.0005 |
| Diphtheria                                                        | A.5.3  | 0.0000           | 0.0000            | 0.0000       | 0.0000       | 0.0000  |



| Causes                                  | Level    | $\Delta$ HALE    |                   |               | $\Delta$ LE   |               | $\Delta$ LED |
|-----------------------------------------|----------|------------------|-------------------|---------------|---------------|---------------|--------------|
|                                         |          | Mortality Effect | Disability Effect | Total Effect  | Total Effect  |               |              |
| Whooping cough                          | A.5.4    | 0.0002           | 0.0000            | 0.0002        | 0.0002        | 0.0000        |              |
| Tetanus                                 | A.5.5    | 0.0029           | 0.0000            | 0.0029        | 0.0035        | 0.0006        |              |
| Measles                                 | A.5.6    | 0.0001           | 0.0000            | 0.0001        | 0.0001        | 0.0000        |              |
| Varicella and herpes zoster             | A.5.7    | 0.0003           | 0.0000            | 0.0003        | 0.0004        | 0.0001        |              |
| Acute hepatitis                         | A.5.8    | 0.0133           | 0.0003            | 0.0136        | 0.0163        | 0.0028        |              |
| Other unspecified infectious diseases   | A.5.9    | 0.0012           | 0.0018            | 0.0029        | 0.0014        | -0.0015       |              |
| Maternal and neonatal disorders         | A.6      | 0.0007           | -0.0230           | -0.0223       | 0.0007        | 0.0230        |              |
| Maternal disorders                      | A.6.1    | 0.0007           | 0.0000            | 0.0007        | 0.0007        | 0.0001        |              |
| Neonatal disorders                      | A.6.2    | 0.0000           | -0.0230           | -0.0230       | 0.0000        | 0.0230        |              |
| Nutritional deficiencies                | A.7      | 0.0025           | 0.0394            | 0.0419        | 0.0031        | -0.0388       |              |
| Protein-energy malnutrition             | A.7.1    | 0.0024           | -0.0041           | -0.0017       | 0.0030        | 0.0047        |              |
| Iodine deficiency                       | A.7.2    | 0.0000           | 0.0004            | 0.0004        | 0.0000        | -0.0004       |              |
| Vitamin A deficiency                    | A.7.3    | 0.0000           | 0.0000            | 0.0000        | 0.0000        | 0.0000        |              |
| Dietary iron deficiency                 | A.7.4    | 0.0000           | 0.0435            | 0.0435        | 0.0000        | -0.0435       |              |
| Other nutritional deficiencies          | A.7.5    | 0.0001           | -0.0003           | -0.0003       | 0.0001        | 0.0003        |              |
| <b>Non-communicable diseases</b>        | <b>B</b> | <b>1.4898</b>    | <b>0.0612</b>     | <b>1.5510</b> | <b>1.8684</b> | <b>0.3174</b> |              |
| Neoplasms                               | B.1      | 0.3848           | -0.0114           | 0.3734        | 0.4800        | 0.1066        |              |
| Lip and oral cavity cancer              | B.1.1    | -0.0010          | -0.0002           | -0.0011       | -0.0013       | -0.0001       |              |
| Nasopharynx cancer                      | B.1.2    | 0.0131           | -0.0008           | 0.0123        | 0.0162        | 0.0039        |              |
| Other pharynx cancer                    | B.1.3    | 0.0007           | 0.0000            | 0.0007        | 0.0009        | 0.0002        |              |
| Esophageal cancer                       | B.1.4    | 0.0679           | 0.0008            | 0.0687        | 0.0856        | 0.0169        |              |
| Stomach cancer                          | B.1.5    | 0.1249           | 0.0005            | 0.1254        | 0.1571        | 0.0317        |              |
| Colon and rectum cancer                 | B.1.6    | -0.0097          | -0.0036           | -0.0133       | -0.0121       | 0.0012        |              |
| Liver cancer                            | B.1.7    | 0.1477           | 0.0016            | 0.1493        | 0.1829        | 0.0337        |              |
| Gallbladder and biliary tract cancer    | B.1.8    | -0.0002          | 0.0000            | -0.0002       | -0.0003       | -0.0001       |              |
| Pancreatic cancer                       | B.1.9    | -0.0105          | -0.0001           | -0.0107       | -0.0131       | -0.0024       |              |
| Larynx cancer                           | B.1.10   | 0.0036           | -0.0002           | 0.0034        | 0.0046        | 0.0011        |              |
| Tracheal, bronchus, and lung cancer     | B.1.11   | 0.0192           | -0.0004           | 0.0188        | 0.0238        | 0.0050        |              |
| Malignant skin melanoma                 | B.1.12   | 0.0005           | -0.0001           | 0.0004        | 0.0006        | 0.0002        |              |
| Non-melanoma skin cancer                | B.1.13   | 0.0000           | 0.0000            | -0.0001       | 0.0000        | 0.0000        |              |
| Breast cancer                           | B.1.14   | 0.0044           | -0.0032           | 0.0012        | 0.0051        | 0.0040        |              |
| Cervical cancer                         | B.1.15   | 0.0015           | -0.0004           | 0.0011        | 0.0019        | 0.0008        |              |
| Uterine cancer                          | B.1.16   | 0.0051           | -0.0003           | 0.0048        | 0.0064        | 0.0016        |              |
| Ovarian cancer                          | B.1.17   | -0.0040          | -0.0003           | -0.0043       | -0.0050       | -0.0008       |              |
| Prostate cancer                         | B.1.18   | 0.0015           | -0.0006           | 0.0009        | 0.0020        | 0.0010        |              |
| Testicular cancer                       | B.1.19   | 0.0001           | -0.0001           | 0.0000        | 0.0001        | 0.0001        |              |
| Kidney cancer                           | B.1.20   | -0.0029          | -0.0004           | -0.0033       | -0.0036       | -0.0004       |              |
| Bladder cancer                          | B.1.21   | 0.0021           | -0.0005           | 0.0017        | 0.0027        | 0.0010        |              |
| Brain and central nervous system cancer | B.1.22   | 0.0037           | -0.0001           | 0.0035        | 0.0045        | 0.0010        |              |
| Thyroid cancer                          | B.1.23   | 0.0005           | -0.0002           | 0.0002        | 0.0006        | 0.0003        |              |
| Mesothelioma                            | B.1.24   | -0.0001          | 0.0000            | -0.0001       | -0.0002       | 0.0000        |              |
| Hodgkin lymphoma                        | B.1.25   | 0.0022           | 0.0000            | 0.0022        | 0.0027        | 0.0006        |              |

| Causes                                              | Level  | $\Delta$ HALE    |                   |              | $\Delta$ LE  |         | $\Delta$ LED |
|-----------------------------------------------------|--------|------------------|-------------------|--------------|--------------|---------|--------------|
|                                                     |        | Mortality Effect | Disability Effect | Total Effect | Total Effect |         |              |
| Non-Hodgkin lymphoma                                | B.1.26 | -0.0027          | -0.0008           | -0.0035      | -0.0034      | 0.0001  |              |
| Multiple myeloma                                    | B.1.27 | 0.0003           | -0.0001           | 0.0002       | 0.0004       | 0.0002  |              |
| Leukemia                                            | B.1.28 | 0.0098           | -0.0005           | 0.0093       | 0.0120       | 0.0027  |              |
| Other malignant neoplasms                           | B.1.29 | 0.0075           | -0.0009           | 0.0066       | 0.0094       | 0.0027  |              |
| Other neoplasms                                     | B.1.30 | -0.0001          | -0.0005           | -0.0006      | -0.0002      | 0.0004  |              |
| Cardiovascular diseases                             | B.2    | 0.5701           | -0.0029           | 0.5671       | 0.7178       | 0.1506  |              |
| Rheumatic heart disease                             | B.2.1  | 0.0684           | -0.0001           | 0.0683       | 0.0850       | 0.0168  |              |
| Ischemic heart disease                              | B.2.2  | 0.0641           | -0.0015           | 0.0626       | 0.0808       | 0.0182  |              |
| Stroke                                              | B.2.3  | 0.3704           | 0.0017            | 0.3721       | 0.4673       | 0.0953  |              |
| Hypertensive heart disease                          | B.2.4  | 0.0593           | -0.0008           | 0.0584       | 0.0746       | 0.0162  |              |
| Non-rheumatic valvular heart disease                | B.2.5  | 0.0009           | -0.0001           | 0.0008       | 0.0011       | 0.0003  |              |
| Cardiomyopathy and myocarditis                      | B.2.6  | 0.0016           | -0.0001           | 0.0015       | 0.0020       | 0.0005  |              |
| Atrial fibrillation and flutter                     | B.2.8  | 0.0008           | -0.0012           | -0.0004      | 0.0010       | 0.0014  |              |
| Aortic aneurysm                                     | B.2.9  | 0.0007           | 0.0000            | 0.0007       | 0.0009       | 0.0002  |              |
| Peripheral artery disease                           | B.2.10 | 0.0000           | 0.0002            | 0.0002       | 0.0000       | -0.0002 |              |
| Endocarditis                                        | B.2.11 | 0.0006           | 0.0000            | 0.0005       | 0.0007       | 0.0001  |              |
| Other cardiovascular and circulatory diseases       | B.2.12 | 0.0034           | -0.0010           | 0.0024       | 0.0043       | 0.0019  |              |
| Chronic respiratory diseases                        | B.3    | 0.3215           | 0.0445            | 0.3660       | 0.4058       | 0.0398  |              |
| Chronic obstructive pulmonary disease               | B.3.1  | 0.3047           | 0.0391            | 0.3438       | 0.3849       | 0.0411  |              |
| Pneumoconiosis                                      | B.3.2  | 0.0046           | 0.0017            | 0.0063       | 0.0057       | -0.0006 |              |
| Asthma                                              | B.3.3  | 0.0118           | 0.0038            | 0.0156       | 0.0147       | -0.0009 |              |
| Interstitial lung disease and pulmonary sarcoidosis | B.3.4  | 0.0004           | -0.0001           | 0.0003       | 0.0005       | 0.0002  |              |
| Other chronic respiratory diseases                  | B.3.5  | 0.0001           | 0.0000            | 0.0000       | 0.0001       | 0.0001  |              |
| Digestive diseases                                  | B.4    | 0.1503           | 0.0182            | 0.1685       | 0.1867       | 0.0182  |              |
| Cirrhosis and other chronic liver diseases          | B.4.1  | 0.0947           | 0.0015            | 0.0962       | 0.1173       | 0.0211  |              |
| Upper digestive system diseases                     | B.4.2  | 0.0340           | 0.0082            | 0.0423       | 0.0424       | 0.0002  |              |
| Appendicitis                                        | B.4.3  | 0.0014           | -0.0002           | 0.0012       | 0.0017       | 0.0005  |              |
| Paralytic ileus and intestinal obstruction          | B.4.4  | 0.0029           | 0.0000            | 0.0029       | 0.0036       | 0.0007  |              |
| Inguinal, femoral, and abdominal hernia             | B.4.5  | 0.0004           | 0.0007            | 0.0010       | 0.0005       | -0.0006 |              |
| Inflammatory bowel disease                          | B.4.6  | 0.0012           | -0.0014           | -0.0002      | 0.0015       | 0.0017  |              |
| Vascular intestinal disorders                       | B.4.7  | 0.0004           | 0.0000            | 0.0004       | 0.0005       | 0.0001  |              |
| Gallbladder and biliary diseases                    | B.4.8  | 0.0067           | 0.0090            | 0.0157       | 0.0084       | -0.0073 |              |
| Pancreatitis                                        | B.4.9  | 0.0030           | 0.0001            | 0.0031       | 0.0037       | 0.0006  |              |
| Other digestive diseases                            | B.4.10 | 0.0057           | 0.0002            | 0.0059       | 0.0071       | 0.0012  |              |
| Neurological disorders                              | B.5    | 0.0076           | -0.0141           | -0.0065      | 0.0094       | 0.0159  |              |
| Alzheimer's disease and other dementias             | B.5.1  | 0.0008           | -0.0019           | -0.0011      | 0.0011       | 0.0022  |              |
| Parkinson's disease                                 | B.5.2  | 0.0029           | -0.0020           | 0.0009       | 0.0037       | 0.0028  |              |
| Idiopathic epilepsy                                 | B.5.3  | 0.0027           | -0.0014           | 0.0013       | 0.0032       | 0.0019  |              |
| Multiple sclerosis                                  | B.5.4  | 0.0003           | -0.0001           | 0.0003       | 0.0004       | 0.0001  |              |
| Motor neuron disease                                | B.5.5  | 0.0004           | 0.0000            | 0.0004       | 0.0005       | 0.0001  |              |
| Headache disorders                                  | B.5.6  | 0.0000           | -0.0076           | -0.0076      | 0.0000       | 0.0076  |              |
| Other neurological disorders                        | B.5.7  | 0.0004           | -0.0011           | -0.0007      | 0.0005       | 0.0012  |              |

| Causes                                           | Level  | $\Delta$ HALE    |                   |              | $\Delta$ LE  |         | $\Delta$ LED |
|--------------------------------------------------|--------|------------------|-------------------|--------------|--------------|---------|--------------|
|                                                  |        | Mortality Effect | Disability Effect | Total Effect | Total Effect |         |              |
| Mental disorders                                 | B.6    | 0.0000           | -0.0068           | -0.0068      | 0.0000       | 0.0068  |              |
| Schizophrenia                                    | B.6.1  | 0.0000           | -0.0014           | -0.0014      | 0.0000       | 0.0014  |              |
| Depressive disorders                             | B.6.2  | 0.0000           | -0.0113           | -0.0113      | 0.0000       | 0.0113  |              |
| Bipolar disorder                                 | B.6.3  | 0.0000           | -0.0001           | -0.0001      | 0.0000       | 0.0001  |              |
| Anxiety disorders                                | B.6.4  | 0.0000           | 0.0046            | 0.0046       | 0.0000       | -0.0046 |              |
| Eating disorders                                 | B.6.5  | 0.0000           | -0.0003           | -0.0003      | 0.0000       | 0.0003  |              |
| Autism spectrum disorders                        | B.6.6  | 0.0000           | -0.0001           | -0.0001      | 0.0000       | 0.0001  |              |
| Attention-deficit/hyperactivity disorder         | B.6.7  | 0.0000           | 0.0001            | 0.0001       | 0.0000       | -0.0001 |              |
| Conduct disorder                                 | B.6.8  | 0.0000           | 0.0000            | 0.0000       | 0.0000       | 0.0000  |              |
| Idiopathic developmental intellectual disability | B.6.9  | 0.0000           | 0.0015            | 0.0015       | 0.0000       | -0.0015 |              |
| Other mental disorders                           | B.6.10 | 0.0000           | 0.0001            | 0.0001       | 0.0000       | -0.0001 |              |
| Substance use disorders                          | B.7    | 0.0091           | -0.0028           | 0.0062       | 0.0111       | 0.0048  |              |
| Alcohol use disorders                            | B.7.1  | -0.0009          | -0.0009           | -0.0019      | -0.0010      | 0.0008  |              |
| Drug use disorders                               | B.7.2  | 0.0100           | -0.0019           | 0.0081       | 0.0121       | 0.0040  |              |
| Diabetes and kidney diseases                     | B.8    | 0.0380           | -0.0268           | 0.0112       | 0.0472       | 0.0359  |              |
| Diabetes mellitus                                | B.8.1  | 0.0133           | -0.0226           | -0.0093      | 0.0168       | 0.0261  |              |
| Chronic kidney disease                           | B.8.2  | 0.0207           | -0.0042           | 0.0166       | 0.0255       | 0.0089  |              |
| Acute glomerulonephritis                         | B.8.3  | 0.0040           | 0.0000            | 0.0040       | 0.0049       | 0.0009  |              |
| Skin and subcutaneous diseases                   | B.9    | 0.0013           | 0.0016            | 0.0029       | 0.0016       | -0.0013 |              |
| Dermatitis                                       | B.9.1  | 0.0000           | -0.0003           | -0.0003      | 0.0000       | 0.0003  |              |
| Psoriasis                                        | B.9.2  | 0.0000           | 0.0039            | 0.0039       | 0.0000       | -0.0039 |              |
| Bacterial skin diseases                          | B.9.3  | 0.0013           | 0.0000            | 0.0013       | 0.0016       | 0.0003  |              |
| Scabies                                          | B.9.4  | 0.0000           | 0.0002            | 0.0002       | 0.0000       | -0.0002 |              |
| Fungal skin diseases                             | B.9.5  | 0.0000           | 0.0001            | 0.0001       | 0.0000       | -0.0001 |              |
| Viral skin diseases                              | B.9.6  | 0.0000           | 0.0001            | 0.0001       | 0.0000       | -0.0001 |              |
| Acne vulgaris                                    | B.9.7  | 0.0000           | -0.0007           | -0.0007      | 0.0000       | 0.0007  |              |
| Alopecia areata                                  | B.9.8  | 0.0000           | 0.0000            | 0.0000       | 0.0000       | 0.0000  |              |
| Pruritus                                         | B.9.9  | 0.0000           | -0.0003           | -0.0003      | 0.0000       | 0.0003  |              |
| Urticaria                                        | B.9.10 | 0.0000           | -0.0001           | -0.0001      | 0.0000       | 0.0001  |              |
| Decubitus ulcer                                  | B.9.11 | -0.0001          | 0.0000            | -0.0001      | -0.0001      | 0.0000  |              |
| Other skin and subcutaneous diseases             | B.9.12 | 0.0000           | -0.0013           | -0.0012      | 0.0000       | 0.0013  |              |
| Sense organ diseases                             | B.10   | 0.0000           | 0.0077            | 0.0077       | 0.0000       | -0.0077 |              |
| Blindness and vision loss                        | B.10.1 | 0.0000           | 0.0002            | 0.0002       | 0.0000       | -0.0002 |              |
| Age-related and other hearing loss               | B.10.2 | 0.0000           | 0.0081            | 0.0081       | 0.0000       | -0.0081 |              |
| Other sense organ diseases                       | B.10.3 | 0.0000           | -0.0006           | -0.0006      | 0.0000       | 0.0006  |              |
| Musculoskeletal disorders                        | B.11   | 0.0003           | 0.0215            | 0.0217       | 0.0003       | -0.0214 |              |
| Rheumatoid arthritis                             | B.11.1 | 0.0005           | -0.0007           | -0.0002      | 0.0006       | 0.0009  |              |
| Osteoarthritis                                   | B.11.2 | 0.0000           | -0.0095           | -0.0095      | 0.0000       | 0.0095  |              |
| Low back pain                                    | B.11.3 | 0.0000           | 0.0814            | 0.0814       | 0.0000       | -0.0814 |              |
| Neck pain                                        | B.11.4 | 0.0000           | -0.0090           | -0.0090      | 0.0000       | 0.0090  |              |
| Gout                                             | B.11.5 | 0.0000           | -0.0021           | -0.0021      | 0.0000       | 0.0021  |              |
| Other musculoskeletal disorders                  | B.11.6 | -0.0002          | -0.0385           | -0.0388      | -0.0003      | 0.0385  |              |

| Causes                                            | Level  | $\Delta$ HALE    |                   |              | $\Delta$ LE  |         | $\Delta$ LED |
|---------------------------------------------------|--------|------------------|-------------------|--------------|--------------|---------|--------------|
|                                                   |        | Mortality Effect | Disability Effect | Total Effect | Total Effect |         |              |
| Other non-communicable diseases                   | B.12   | 0.0069           | 0.0326            | 0.0395       | 0.0086       | -0.0309 |              |
| Congenital birth defects                          | B.12.1 | 0.0007           | 0.0017            | 0.0023       | 0.0008       | -0.0015 |              |
| Urinary diseases and male infertility             | B.12.2 | 0.0033           | 0.0032            | 0.0065       | 0.0041       | -0.0024 |              |
| Gynecological diseases                            | B.12.3 | -0.0001          | 0.0171            | 0.0170       | -0.0001      | -0.0171 |              |
| Hemoglobinopathies and hemolytic anemias          | B.12.4 | 0.0022           | 0.0117            | 0.0139       | 0.0027       | -0.0112 |              |
| Endocrine, metabolic, blood, and immune disorders | B.12.5 | 0.0009           | -0.0027           | -0.0018      | 0.0011       | 0.0029  |              |
| Oral disorders                                    | B.12.6 | 0.0000           | 0.0016            | 0.0016       | 0.0000       | -0.0016 |              |
| <b>Injuries</b>                                   | C      | 0.1336           | -0.0102           | 0.1234       | 0.1624       | 0.0390  |              |
| Transport injuries                                | C.1    | 0.0251           | -0.0199           | 0.0052       | 0.0302       | 0.0250  |              |
| Road injuries                                     | C.1.1  | 0.0203           | -0.0212           | -0.0009      | 0.0244       | 0.0253  |              |
| Other transport injuries                          | C.1.2  | 0.0048           | 0.0013            | 0.0061       | 0.0058       | -0.0003 |              |
| Unintentional injuries                            | C.2    | 0.0271           | 0.0058            | 0.0328       | 0.0331       | 0.0002  |              |
| Falls                                             | C.2.1  | 0.0015           | 0.0040            | 0.0055       | 0.0019       | -0.0036 |              |
| Drowning                                          | C.2.2  | 0.0090           | 0.0004            | 0.0094       | 0.0109       | 0.0015  |              |
| Fire, heat, and hot substances                    | C.2.3  | 0.0025           | 0.0000            | 0.0025       | 0.0031       | 0.0005  |              |
| Poisonings                                        | C.2.4  | 0.0002           | 0.0000            | 0.0001       | 0.0002       | 0.0000  |              |
| Exposure to mechanical forces                     | C.2.5  | 0.0034           | -0.0037           | -0.0003      | 0.0041       | 0.0044  |              |
| Adverse effects of medical treatment              | C.2.6  | 0.0027           | 0.0000            | 0.0027       | 0.0033       | 0.0006  |              |
| Animal contact                                    | C.2.7  | 0.0033           | 0.0010            | 0.0043       | 0.0040       | -0.0002 |              |
| Foreign body                                      | C.2.8  | 0.0002           | 0.0031            | 0.0033       | 0.0003       | -0.0031 |              |
| Environmental heat and cold exposure              | C.2.9  | 0.0037           | 0.0005            | 0.0042       | 0.0045       | 0.0003  |              |
| Exposure to forces of nature                      | C.2.10 | 0.0004           | -0.0005           | -0.0001      | 0.0005       | 0.0006  |              |
| Other unintentional injuries                      | C.2.11 | 0.0002           | 0.0009            | 0.0011       | 0.0003       | -0.0008 |              |
| Self-harm and interpersonal violence              | C.3    | 0.0814           | 0.0039            | 0.0853       | 0.0991       | 0.0138  |              |
| Self-harm                                         | C.3.1  | 0.0724           | 0.0020            | 0.0744       | 0.0883       | 0.0139  |              |
| Interpersonal violence                            | C.3.2  | 0.0083           | 0.0019            | 0.0102       | 0.0099       | -0.0003 |              |
| Conflict and terrorism                            | C.3.3  | 0.0000           | 0.0000            | 0.0000       | 0.0000       | 0.0000  |              |
| Executions and police conflict                    | C.3.4  | 0.0008           | 0.0000            | 0.0008       | 0.0009       | 0.0002  |              |

**Table S7d | Cause-specific effects of mortality and disability (years) on changes in life expectancy (LE) and health-adjusted life expectancy (HALE) for those aged 65+ years from 1990 to 2019.**

| Causes                                                            | Level  | $\Delta$ HALE    |                   |              | $\Delta$ LE  | $\Delta$ LED |
|-------------------------------------------------------------------|--------|------------------|-------------------|--------------|--------------|--------------|
|                                                                   |        | Mortality Effect | Disability Effect | Total Effect | Total Effect |              |
| <b>Communicable, maternal, neonatal, and nutritional diseases</b> | A      | 0.4670           | 0.0708            | 0.5378       | 0.3158       | -0.2220      |
| HIV/AIDS and sexually transmitted infections                      | A.1    | -0.0035          | -0.0009           | -0.0044      | -0.0034      | 0.0009       |
| HIV/AIDS                                                          | A.1.1  | -0.0041          | -0.0009           | -0.0050      | -0.0039      | 0.0011       |
| Sexually transmitted infections excluding HIV                     | A.1.2  | 0.0006           | 0.0000            | 0.0007       | 0.0005       | -0.0002      |
| Respiratory infections and tuberculosis                           | A.2    | 0.3966           | 0.0163            | 0.4129       | 0.2707       | -0.1422      |
| Tuberculosis                                                      | A.2.1  | 0.1455           | 0.0145            | 0.1600       | 0.1205       | -0.0395      |
| Lower respiratory infections                                      | A.2.2  | 0.2258           | 0.0011            | 0.2269       | 0.1368       | -0.0901      |
| Upper respiratory infections                                      | A.2.3  | 0.0253           | -0.0001           | 0.0252       | 0.0133       | -0.0118      |
| Otitis media                                                      | A.2.4  | 0.0001           | 0.0007            | 0.0008       | 0.0001       | -0.0007      |
| Enteric infections                                                | A.3    | 0.0241           | 0.0005            | 0.0246       | 0.0153       | -0.0093      |
| Diarrheal diseases                                                | A.3.1  | 0.0239           | 0.0005            | 0.0244       | 0.0151       | -0.0093      |
| Typhoid and paratyphoid                                           | A.3.2  | 0.0000           | 0.0000            | 0.0000       | 0.0000       | 0.0000       |
| Invasive Non-typhoidal Salmonella (iNTS)                          | A.3.3  | 0.0001           | 0.0000            | 0.0001       | 0.0001       | 0.0000       |
| Other intestinal infectious diseases                              | A.3.4  | 0.0001           | 0.0000            | 0.0000       | 0.0000       | 0.0000       |
| Neglected tropical diseases and malaria                           | A.4    | 0.0026           | 0.0196            | 0.0222       | 0.0022       | -0.0200      |
| Malaria                                                           | A.4.1  | 0.0002           | 0.0001            | 0.0002       | 0.0002       | -0.0001      |
| Chagas disease                                                    | A.4.2  | 0.0000           | 0.0000            | 0.0000       | 0.0000       | 0.0000       |
| Leishmaniasis                                                     | A.4.3  | 0.0000           | 0.0000            | 0.0000       | 0.0000       | 0.0000       |
| African trypanosomiasis                                           | A.4.4  | 0.0000           | 0.0000            | 0.0000       | 0.0000       | 0.0000       |
| Schistosomiasis                                                   | A.4.5  | 0.0020           | 0.0004            | 0.0024       | 0.0017       | -0.0007      |
| Cysticercosis                                                     | A.4.6  | 0.0000           | 0.0027            | 0.0027       | 0.0000       | -0.0027      |
| Cystic echinococcosis                                             | A.4.7  | 0.0000           | 0.0000            | 0.0000       | 0.0000       | 0.0000       |
| Lymphatic filariasis                                              | A.4.8  | 0.0000           | 0.0000            | 0.0000       | 0.0000       | 0.0000       |
| Onchocerciasis                                                    | A.4.9  | 0.0000           | 0.0000            | 0.0000       | 0.0000       | 0.0000       |
| Trachoma                                                          | A.4.10 | 0.0000           | 0.0022            | 0.0022       | 0.0000       | -0.0022      |
| Dengue                                                            | A.4.11 | 0.0000           | -0.0002           | -0.0002      | 0.0000       | 0.0002       |
| Yellow fever                                                      | A.4.12 | 0.0000           | 0.0000            | 0.0000       | 0.0000       | 0.0000       |
| Rabies                                                            | A.4.13 | 0.0001           | 0.0000            | 0.0001       | 0.0001       | 0.0000       |
| Intestinal nematode infections                                    | A.4.14 | 0.0001           | 0.0043            | 0.0044       | 0.0000       | -0.0043      |
| Food-borne trematodiasis                                          | A.4.15 | 0.0000           | 0.0091            | 0.0091       | 0.0000       | -0.0091      |
| Leprosy                                                           | A.4.16 | 0.0000           | 0.0000            | 0.0000       | 0.0000       | 0.0000       |
| Ebola                                                             | A.4.17 | 0.0000           | 0.0000            | 0.0000       | 0.0000       | 0.0000       |
| Zika virus                                                        | A.4.18 | 0.0000           | 0.0000            | 0.0000       | 0.0000       | 0.0000       |
| Guinea worm disease                                               | A.4.19 | 0.0000           | 0.0000            | 0.0000       | 0.0000       | 0.0000       |
| Other neglected tropical diseases                                 | A.4.20 | 0.0002           | 0.0011            | 0.0013       | 0.0002       | -0.0011      |
| Other infectious diseases                                         | A.5    | 0.0264           | 0.0021            | 0.0284       | 0.0201       | -0.0083      |
| Meningitis                                                        | A.5.1  | 0.0049           | 0.0006            | 0.0055       | 0.0036       | -0.0019      |
| Encephalitis                                                      | A.5.2  | 0.0003           | 0.0002            | 0.0005       | 0.0003       | -0.0002      |
| Diphtheria                                                        | A.5.3  | 0.0000           | 0.0000            | 0.0000       | 0.0000       | 0.0000       |

| Causes                                  | Level    | $\Delta$ HALE    |                   | $\Delta$ LE   |               | $\Delta$ LED   |
|-----------------------------------------|----------|------------------|-------------------|---------------|---------------|----------------|
|                                         |          | Mortality Effect | Disability Effect | Total Effect  | Total Effect  |                |
| Whooping cough                          | A.5.4    | 0.0000           | 0.0000            | 0.0000        | 0.0000        | 0.0000         |
| Tetanus                                 | A.5.5    | 0.0033           | 0.0000            | 0.0033        | 0.0026        | -0.0007        |
| Measles                                 | A.5.6    | 0.0000           | 0.0000            | 0.0000        | 0.0000        | 0.0000         |
| Varicella and herpes zoster             | A.5.7    | 0.0036           | 0.0000            | 0.0036        | 0.0018        | -0.0018        |
| Acute hepatitis                         | A.5.8    | 0.0120           | 0.0002            | 0.0121        | 0.0102        | -0.0020        |
| Other unspecified infectious diseases   | A.5.9    | 0.0023           | 0.0011            | 0.0034        | 0.0016        | -0.0018        |
| Maternal and neonatal disorders         | A.6      | 0.0000           | -0.0081           | -0.0081       | 0.0000        | 0.0081         |
| Maternal disorders                      | A.6.1    | 0.0000           | 0.0000            | 0.0000        | 0.0000        | 0.0000         |
| Neonatal disorders                      | A.6.2    | 0.0000           | -0.0081           | -0.0081       | 0.0000        | 0.0081         |
| Nutritional deficiencies                | A.7      | 0.0208           | 0.0413            | 0.0621        | 0.0109        | -0.0512        |
| Protein-energy malnutrition             | A.7.1    | 0.0222           | -0.0032           | 0.0190        | 0.0115        | -0.0076        |
| Iodine deficiency                       | A.7.2    | 0.0000           | 0.0003            | 0.0003        | 0.0000        | -0.0003        |
| Vitamin A deficiency                    | A.7.3    | 0.0000           | 0.0000            | 0.0000        | 0.0000        | 0.0000         |
| Dietary iron deficiency                 | A.7.4    | 0.0000           | 0.0445            | 0.0445        | 0.0000        | -0.0445        |
| Other nutritional deficiencies          | A.7.5    | -0.0014          | -0.0002           | -0.0016       | -0.0005       | 0.0010         |
| <b>Non-communicable diseases</b>        | <b>B</b> | <b>3.6646</b>    | <b>0.0146</b>     | <b>3.6791</b> | <b>2.7537</b> | <b>-0.9254</b> |
| Neoplasms                               | B.1      | 0.0653           | -0.0265           | 0.0388        | 0.1150        | 0.0762         |
| Lip and oral cavity cancer              | B.1.1    | -0.0032          | -0.0003           | -0.0035       | -0.0026       | 0.0008         |
| Nasopharynx cancer                      | B.1.2    | 0.0081           | -0.0004           | 0.0077        | 0.0068        | -0.0009        |
| Other pharynx cancer                    | B.1.3    | 0.0005           | 0.0000            | 0.0005        | 0.0004        | -0.0001        |
| Esophageal cancer                       | B.1.4    | 0.0760           | 0.0007            | 0.0767        | 0.0726        | -0.0040        |
| Stomach cancer                          | B.1.5    | 0.1296           | -0.0002           | 0.1294        | 0.1197        | -0.0096        |
| Colon and rectum cancer                 | B.1.6    | -0.0520          | -0.0075           | -0.0595       | -0.0372       | 0.0223         |
| Liver cancer                            | B.1.7    | 0.1042           | 0.0014            | 0.1056        | 0.0939        | -0.0118        |
| Gallbladder and biliary tract cancer    | B.1.8    | -0.0034          | -0.0001           | -0.0036       | -0.0024       | 0.0012         |
| Pancreatic cancer                       | B.1.9    | -0.0324          | -0.0005           | -0.0329       | -0.0255       | 0.0074         |
| Larynx cancer                           | B.1.10   | 0.0025           | -0.0003           | 0.0021        | 0.0023        | 0.0002         |
| Tracheal, bronchus, and lung cancer     | B.1.11   | -0.1490          | -0.0040           | -0.1530       | -0.1055       | 0.0475         |
| Malignant skin melanoma                 | B.1.12   | 0.0002           | -0.0001           | 0.0001        | 0.0002        | 0.0001         |
| Non-melanoma skin cancer                | B.1.13   | -0.0030          | -0.0001           | -0.0031       | -0.0017       | 0.0014         |
| Breast cancer                           | B.1.14   | -0.0071          | -0.0029           | -0.0100       | -0.0057       | 0.0043         |
| Cervical cancer                         | B.1.15   | 0.0041           | 0.0000            | 0.0041        | 0.0035        | -0.0005        |
| Uterine cancer                          | B.1.16   | 0.0046           | -0.0001           | 0.0044        | 0.0040        | -0.0005        |
| Ovarian cancer                          | B.1.17   | -0.0048          | -0.0002           | -0.0050       | -0.0044       | 0.0006         |
| Prostate cancer                         | B.1.18   | -0.0010          | -0.0038           | -0.0047       | 0.0010        | 0.0057         |
| Testicular cancer                       | B.1.19   | -0.0001          | -0.0001           | -0.0002       | -0.0001       | 0.0001         |
| Kidney cancer                           | B.1.20   | -0.0065          | -0.0004           | -0.0069       | -0.0048       | 0.0021         |
| Bladder cancer                          | B.1.21   | 0.0028           | -0.0012           | 0.0017        | 0.0025        | 0.0008         |
| Brain and central nervous system cancer | B.1.22   | -0.0038          | -0.0003           | -0.0041       | -0.0026       | 0.0015         |
| Thyroid cancer                          | B.1.23   | -0.0002          | -0.0002           | -0.0003       | 0.0000        | 0.0003         |
| Mesothelioma                            | B.1.24   | 0.0000           | 0.0000            | 0.0000        | 0.0000        | 0.0000         |
| Hodgkin lymphoma                        | B.1.25   | 0.0023           | -0.0001           | 0.0023        | 0.0021        | -0.0002        |

| Causes                                              | Level  | $\Delta$ HALE    |                   |              | $\Delta$ LE  |         | $\Delta$ LED |
|-----------------------------------------------------|--------|------------------|-------------------|--------------|--------------|---------|--------------|
|                                                     |        | Mortality Effect | Disability Effect | Total Effect | Total Effect |         |              |
| Non-Hodgkin lymphoma                                | B.1.26 | -0.0061          | -0.0019           | -0.0079      | -0.0053      | 0.0026  |              |
| Multiple myeloma                                    | B.1.27 | -0.0006          | -0.0002           | -0.0008      | -0.0004      | 0.0004  |              |
| Leukemia                                            | B.1.28 | 0.0031           | -0.0007           | 0.0025       | 0.0030       | 0.0005  |              |
| Other malignant neoplasms                           | B.1.29 | 0.0013           | -0.0022           | -0.0009      | 0.0019       | 0.0028  |              |
| Other neoplasms                                     | B.1.30 | -0.0007          | -0.0010           | -0.0016      | -0.0005      | 0.0012  |              |
| Cardiovascular diseases                             | B.2    | 1.0592           | -0.0771           | 0.9821       | 0.9082       | -0.0739 |              |
| Rheumatic heart disease                             | B.2.1  | 0.1484           | -0.0003           | 0.1481       | 0.1085       | -0.0396 |              |
| Ischemic heart disease                              | B.2.2  | -0.3870          | -0.0022           | -0.3892      | -0.1663      | 0.2228  |              |
| Stroke                                              | B.2.3  | 0.9916           | -0.0771           | 0.9145       | 0.7485       | -0.1660 |              |
| Hypertensive heart disease                          | B.2.4  | 0.2947           | 0.0049            | 0.2996       | 0.2075       | -0.0921 |              |
| Non-rheumatic valvular heart disease                | B.2.5  | 0.0032           | -0.0010           | 0.0022       | 0.0020       | -0.0002 |              |
| Cardiomyopathy and myocarditis                      | B.2.6  | -0.0028          | 0.0001            | -0.0027      | -0.0007      | 0.0020  |              |
| Atrial fibrillation and flutter                     | B.2.8  | 0.0027           | -0.0027           | 0.0000       | 0.0025       | 0.0025  |              |
| Aortic aneurysm                                     | B.2.9  | 0.0005           | 0.0000            | 0.0005       | 0.0005       | 0.0000  |              |
| Peripheral artery disease                           | B.2.10 | -0.0004          | 0.0014            | 0.0010       | -0.0002      | -0.0012 |              |
| Endocarditis                                        | B.2.11 | 0.0012           | 0.0000            | 0.0011       | 0.0008       | -0.0003 |              |
| Other cardiovascular and circulatory diseases       | B.2.12 | 0.0071           | -0.0002           | 0.0070       | 0.0052       | -0.0017 |              |
| Chronic respiratory diseases                        | B.3    | 2.3184           | 0.0559            | 2.3743       | 1.5502       | -0.8241 |              |
| Chronic obstructive pulmonary disease               | B.3.1  | 2.2457           | 0.0489            | 2.2946       | 1.4994       | -0.7952 |              |
| Pneumoconiosis                                      | B.3.2  | 0.0080           | -0.0005           | 0.0075       | 0.0069       | -0.0006 |              |
| Asthma                                              | B.3.3  | 0.0657           | 0.0085            | 0.0743       | 0.0444       | -0.0299 |              |
| Interstitial lung disease and pulmonary sarcoidosis | B.3.4  | -0.0004          | -0.0009           | -0.0013      | -0.0001      | 0.0013  |              |
| Other chronic respiratory diseases                  | B.3.5  | -0.0006          | -0.0001           | -0.0007      | -0.0003      | 0.0003  |              |
| Digestive diseases                                  | B.4    | 0.2080           | 0.0202            | 0.2282       | 0.1597       | -0.0685 |              |
| Cirrhosis and other chronic liver diseases          | B.4.1  | 0.0663           | 0.0008            | 0.0671       | 0.0580       | -0.0092 |              |
| Upper digestive system diseases                     | B.4.2  | 0.0673           | 0.0072            | 0.0745       | 0.0513       | -0.0233 |              |
| Appendicitis                                        | B.4.3  | 0.0042           | -0.0001           | 0.0041       | 0.0029       | -0.0012 |              |
| Paralytic ileus and intestinal obstruction          | B.4.4  | 0.0116           | -0.0001           | 0.0116       | 0.0079       | -0.0037 |              |
| Inguinal, femoral, and abdominal hernia             | B.4.5  | 0.0019           | 0.0000            | 0.0019       | 0.0013       | -0.0006 |              |
| Inflammatory bowel disease                          | B.4.6  | 0.0068           | -0.0008           | 0.0060       | 0.0041       | -0.0020 |              |
| Vascular intestinal disorders                       | B.4.7  | 0.0011           | 0.0000            | 0.0011       | 0.0008       | -0.0002 |              |
| Gallbladder and biliary diseases                    | B.4.8  | 0.0241           | 0.0125            | 0.0366       | 0.0169       | -0.0197 |              |
| Pancreatitis                                        | B.4.9  | 0.0036           | 0.0001            | 0.0037       | 0.0029       | -0.0007 |              |
| Other digestive diseases                            | B.4.10 | 0.0211           | 0.0005            | 0.0217       | 0.0137       | -0.0079 |              |
| Neurological disorders                              | B.5    | 0.0172           | -0.0494           | -0.0322      | 0.0143       | 0.0466  |              |
| Alzheimer's disease and other dementias             | B.5.1  | 0.0035           | -0.0384           | -0.0349      | 0.0032       | 0.0381  |              |
| Parkinson's disease                                 | B.5.2  | 0.0130           | -0.0052           | 0.0077       | 0.0103       | 0.0026  |              |
| Idiopathic epilepsy                                 | B.5.3  | 0.0009           | -0.0020           | -0.0011      | 0.0008       | 0.0019  |              |
| Multiple sclerosis                                  | B.5.4  | 0.0001           | 0.0000            | 0.0001       | 0.0001       | 0.0000  |              |
| Motor neuron disease                                | B.5.5  | 0.0001           | 0.0000            | 0.0001       | 0.0001       | 0.0000  |              |
| Headache disorders                                  | B.5.6  | 0.0000           | -0.0027           | -0.0027      | 0.0000       | 0.0027  |              |
| Other neurological disorders                        | B.5.7  | -0.0004          | -0.0010           | -0.0014      | -0.0002      | 0.0012  |              |

| Causes                                           | Level  | $\Delta$ HALE    |                   |              | $\Delta$ LE  |         | $\Delta$ LED |
|--------------------------------------------------|--------|------------------|-------------------|--------------|--------------|---------|--------------|
|                                                  |        | Mortality Effect | Disability Effect | Total Effect | Total Effect |         |              |
| Mental disorders                                 | B.6    | 0.0000           | -0.0151           | -0.0151      | 0.0000       | 0.0151  |              |
| Schizophrenia                                    | B.6.1  | 0.0000           | -0.0007           | -0.0007      | 0.0000       | 0.0007  |              |
| Depressive disorders                             | B.6.2  | 0.0000           | -0.0200           | -0.0200      | 0.0000       | 0.0200  |              |
| Bipolar disorder                                 | B.6.3  | 0.0000           | 0.0000            | 0.0000       | 0.0000       | 0.0000  |              |
| Anxiety disorders                                | B.6.4  | 0.0000           | 0.0054            | 0.0054       | 0.0000       | -0.0054 |              |
| Eating disorders                                 | B.6.5  | 0.0000           | 0.0000            | 0.0000       | 0.0000       | 0.0000  |              |
| Autism spectrum disorders                        | B.6.6  | 0.0000           | -0.0002           | -0.0002      | 0.0000       | 0.0002  |              |
| Attention-deficit/hyperactivity disorder         | B.6.7  | 0.0000           | 0.0000            | 0.0000       | 0.0000       | 0.0000  |              |
| Conduct disorder                                 | B.6.8  | 0.0000           | 0.0000            | 0.0000       | 0.0000       | 0.0000  |              |
| Idiopathic developmental intellectual disability | B.6.9  | 0.0000           | 0.0007            | 0.0007       | 0.0000       | -0.0007 |              |
| Other mental disorders                           | B.6.10 | 0.0000           | -0.0002           | -0.0002      | 0.0000       | 0.0002  |              |
| Substance use disorders                          | B.7    | 0.0053           | -0.0059           | -0.0006      | 0.0045       | 0.0052  |              |
| Alcohol use disorders                            | B.7.1  | -0.0004          | -0.0034           | -0.0038      | -0.0003      | 0.0035  |              |
| Drug use disorders                               | B.7.2  | 0.0056           | -0.0025           | 0.0032       | 0.0049       | 0.0017  |              |
| Diabetes and kidney diseases                     | B.8    | -0.0238          | -0.0167           | -0.0405      | -0.0083      | 0.0322  |              |
| Diabetes mellitus                                | B.8.1  | -0.0212          | -0.0142           | -0.0354      | -0.0094      | 0.0259  |              |
| Chronic kidney disease                           | B.8.2  | -0.0086          | -0.0026           | -0.0112      | -0.0037      | 0.0076  |              |
| Acute glomerulonephritis                         | B.8.3  | 0.0061           | 0.0000            | 0.0061       | 0.0048       | -0.0013 |              |
| Skin and subcutaneous diseases                   | B.9    | 0.0093           | 0.0008            | 0.0102       | 0.0050       | -0.0052 |              |
| Dermatitis                                       | B.9.1  | 0.0000           | 0.0000            | 0.0000       | 0.0000       | 0.0000  |              |
| Psoriasis                                        | B.9.2  | 0.0000           | 0.0027            | 0.0027       | 0.0000       | -0.0027 |              |
| Bacterial skin diseases                          | B.9.3  | 0.0103           | 0.0000            | 0.0103       | 0.0053       | -0.0049 |              |
| Scabies                                          | B.9.4  | 0.0000           | 0.0002            | 0.0002       | 0.0000       | -0.0002 |              |
| Fungal skin diseases                             | B.9.5  | 0.0000           | 0.0001            | 0.0001       | 0.0000       | -0.0001 |              |
| Viral skin diseases                              | B.9.6  | 0.0000           | -0.0001           | -0.0001      | 0.0000       | 0.0001  |              |
| Acne vulgaris                                    | B.9.7  | 0.0000           | -0.0002           | -0.0002      | 0.0000       | 0.0002  |              |
| Alopecia areata                                  | B.9.8  | 0.0000           | 0.0000            | 0.0000       | 0.0000       | 0.0000  |              |
| Pruritus                                         | B.9.9  | 0.0000           | -0.0003           | -0.0003      | 0.0000       | 0.0003  |              |
| Urticaria                                        | B.9.10 | 0.0000           | 0.0000            | 0.0000       | 0.0000       | 0.0000  |              |
| Decubitus ulcer                                  | B.9.11 | -0.0012          | -0.0003           | -0.0015      | -0.0006      | 0.0009  |              |
| Other skin and subcutaneous diseases             | B.9.12 | 0.0003           | -0.0012           | -0.0009      | 0.0002       | 0.0011  |              |
| Sense organ diseases                             | B.10   | 0.0000           | 0.0391            | 0.0391       | 0.0000       | -0.0391 |              |
| Blindness and vision loss                        | B.10.1 | 0.0000           | 0.0301            | 0.0301       | 0.0000       | -0.0301 |              |
| Age-related and other hearing loss               | B.10.2 | 0.0000           | 0.0099            | 0.0099       | 0.0000       | -0.0099 |              |
| Other sense organ diseases                       | B.10.3 | 0.0000           | -0.0008           | -0.0008      | 0.0000       | 0.0008  |              |
| Musculoskeletal disorders                        | B.11   | -0.0029          | 0.0574            | 0.0545       | -0.0013      | -0.0558 |              |
| Rheumatoid arthritis                             | B.11.1 | -0.0014          | -0.0004           | -0.0018      | -0.0005      | 0.0012  |              |
| Osteoarthritis                                   | B.11.2 | 0.0000           | -0.0113           | -0.0113      | 0.0000       | 0.0113  |              |
| Low back pain                                    | B.11.3 | 0.0000           | 0.0997            | 0.0997       | 0.0000       | -0.0997 |              |
| Neck pain                                        | B.11.4 | 0.0000           | -0.0058           | -0.0058      | 0.0000       | 0.0058  |              |
| Gout                                             | B.11.5 | 0.0000           | -0.0038           | -0.0038      | 0.0000       | 0.0038  |              |
| Other musculoskeletal disorders                  | B.11.6 | -0.0015          | -0.0210           | -0.0225      | -0.0008      | 0.0218  |              |



| Causes                                            | Level  | $\Delta$ HALE    |                   |              | $\Delta$ LE  |         | $\Delta$ LED |
|---------------------------------------------------|--------|------------------|-------------------|--------------|--------------|---------|--------------|
|                                                   |        | Mortality Effect | Disability Effect | Total Effect | Total Effect |         |              |
| Other non-communicable diseases                   | B.12   | 0.0085           | 0.0319            | 0.0404       | 0.0064       | -0.0339 |              |
| Congenital birth defects                          | B.12.1 | 0.0000           | 0.0009            | 0.0010       | 0.0001       | -0.0009 |              |
| Urinary diseases and male infertility             | B.12.2 | 0.0080           | 0.0019            | 0.0099       | 0.0054       | -0.0045 |              |
| Gynecological diseases                            | B.12.3 | -0.0002          | 0.0066            | 0.0064       | -0.0001      | -0.0065 |              |
| Hemoglobinopathies and hemolytic anemias          | B.12.4 | 0.0024           | 0.0135            | 0.0159       | 0.0020       | -0.0139 |              |
| Endocrine, metabolic, blood, and immune disorders | B.12.5 | -0.0018          | 0.0038            | 0.0021       | -0.0009      | -0.0030 |              |
| Oral disorders                                    | B.12.6 | 0.0000           | 0.0051            | 0.0051       | 0.0000       | -0.0051 |              |
| <b>Injuries</b>                                   | C      | 0.0534           | -0.0561           | -0.0026      | 0.0550       | 0.0576  |              |
| Transport injuries                                | C.1    | -0.0019          | -0.0285           | -0.0304      | -0.0001      | 0.0303  |              |
| Road injuries                                     | C.1.1  | -0.0040          | -0.0295           | -0.0335      | -0.0019      | 0.0316  |              |
| Other transport injuries                          | C.1.2  | 0.0021           | 0.0010            | 0.0031       | 0.0018       | -0.0013 |              |
| Unintentional injuries                            | C.2    | -0.0076          | -0.0295           | -0.0372      | 0.0042       | 0.0414  |              |
| Falls                                             | C.2.1  | -0.0275          | -0.0284           | -0.0560      | -0.0112      | 0.0448  |              |
| Drowning                                          | C.2.2  | 0.0056           | -0.0003           | 0.0054       | 0.0048       | -0.0006 |              |
| Fire, heat, and hot substances                    | C.2.3  | 0.0058           | -0.0001           | 0.0057       | 0.0039       | -0.0017 |              |
| Poisonings                                        | C.2.4  | -0.0023          | 0.0000            | -0.0023      | -0.0016      | 0.0007  |              |
| Exposure to mechanical forces                     | C.2.5  | -0.0002          | -0.0044           | -0.0046      | 0.0000       | 0.0046  |              |
| Adverse effects of medical treatment              | C.2.6  | 0.0039           | 0.0000            | 0.0039       | 0.0029       | -0.0010 |              |
| Animal contact                                    | C.2.7  | 0.0021           | 0.0009            | 0.0030       | 0.0019       | -0.0011 |              |
| Foreign body                                      | C.2.8  | -0.0014          | 0.0023            | 0.0009       | -0.0007      | -0.0016 |              |
| Environmental heat and cold exposure              | C.2.9  | 0.0064           | 0.0005            | 0.0070       | 0.0041       | -0.0028 |              |
| Exposure to forces of nature                      | C.2.10 | 0.0003           | -0.0004           | -0.0001      | 0.0002       | 0.0003  |              |
| Other unintentional injuries                      | C.2.11 | -0.0004          | 0.0004            | 0.0000       | -0.0003      | -0.0003 |              |
| Self-harm and interpersonal violence              | C.3    | 0.0630           | 0.0020            | 0.0650       | 0.0509       | -0.0141 |              |
| Self-harm                                         | C.3.1  | 0.0603           | 0.0015            | 0.0619       | 0.0483       | -0.0135 |              |
| Interpersonal violence                            | C.3.2  | 0.0026           | 0.0005            | 0.0031       | 0.0025       | -0.0006 |              |
| Conflict and terrorism                            | C.3.3  | 0.0000           | 0.0000            | 0.0000       | 0.0000       | 0.0000  |              |
| Executions and police conflict                    | C.3.4  | 0.0001           | 0.0000            | 0.0001       | 0.0001       | 0.0000  |              |
